# Supplementary material for: Chromene-dihydropyrimidinone and xanthene-dihydropyrimidinone hybrids: design, synthesis, and antibacterial and antibiofilm activities
Source: Royal Society of Chemistry journal article supplement (doi:10.1039/d2nj05211c), 2023-01-01
Supplement: d2nj05211c1.pdf [file d2nj05211c1.pdf]

## Supplementary Information

Chromene-Dihydropyrimidinone and Xanthene-Dihydropyrimidinone hybrids: design, synthesis, and antibacterial and antibiofilm activities.

Samuel J. Santos,<sup>a</sup> Fernanda C. P. Rossatto,<sup>b</sup> Natália S. Jardim,<sup>c</sup> Daiana S. de Ávila,<sup>c</sup> Rodrigo Ligabue-Braun,<sup>d</sup> Luiz A. M. Fontoura,<sup>e</sup> Karine R. Zimmer<sup>\*b</sup> and Dennis Russowsky<sup>\*a</sup>

<sup>a</sup> Laboratório de Sínteses Orgânicas, Instituto de Química, Universidade Federal do Rio Grande do Sul, Av. Bento Gonçalves 9500, CEP 91501-970, Porto Alegre, RS, Brazil.

<sup>b</sup> Departamento de Ciências Básicas da Saúde, Universidade Federal de Ciências da Saúde de Porto Alegre, R. Sarmiento Leite 245, CEP 90050-170, Centro Histórico, Porto Alegre, RS, Brazil.

<sup>c</sup> Grupo de Pesquisa em Bioquímica e Toxicologia em *Caenorhabditis elegans* (GBToxCe), Universidade Federal do Pampa, BR 472, Km 585, CEP 97501-970, Uruguaiana, RS, Brazil.

<sup>d</sup> Departamento de Farmacociências, Universidade Federal de Ciências da Saúde de Porto Alegre, R. Sarmiento Leite 245, CEP 90050-170, Centro Histórico, Porto Alegre, RS, Brazil.

<sup>e</sup> Centro de Pesquisa em Produto e Desenvolvimento, Universidade Luterana do Brasil, Av. Farroupilha 8001, CEP 92425-900, Canoas, RS, Brazil.

### Index

|                                                                                                     |            |
|-----------------------------------------------------------------------------------------------------|------------|
| <sup>1</sup> H NMR and <sup>13</sup> C NMR Spectra of Aldehydes <b>3a-d</b> .....                   | <b>S2</b>  |
| <sup>1</sup> H NMR and <sup>13</sup> C NMR Spectra of propargyloxy-chromenes <b>6a,d</b> .....      | <b>S10</b> |
| <sup>1</sup> H NMR and <sup>13</sup> C NMR Spectra of propargyloxy-xanthenediones <b>8a,d</b> ..... | <b>S18</b> |
| <sup>1</sup> H NMR and <sup>13</sup> C NMR Spectra of Chloro-DHPMs <b>12a,d</b> .....               | <b>S26</b> |
| <sup>1</sup> H NMR and <sup>13</sup> C NMR Spectra of Azido-DHPMs <b>14a,d</b> .....                | <b>S34</b> |
| <sup>1</sup> H NMR and <sup>13</sup> C NMR Spectra of Hybrids <b>15a-v</b> .....                    | <b>S42</b> |
| <b>Table S1</b> . Antibiofilm activity of hybrids compounds.....                                    | <b>S92</b> |

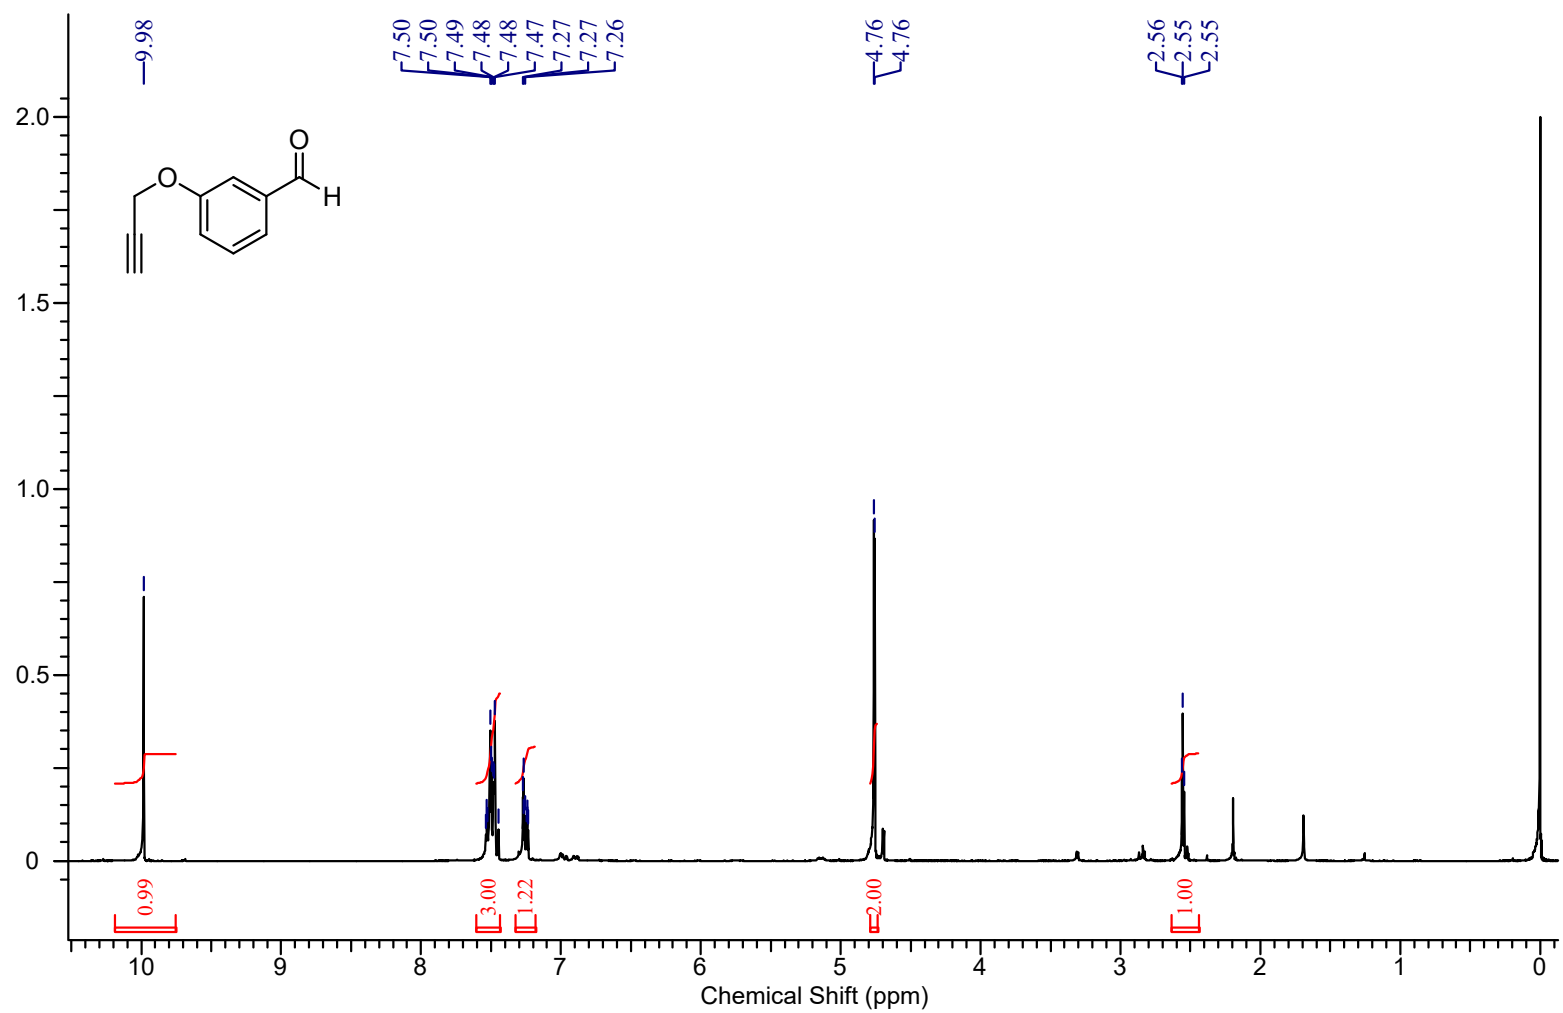

Figure S1: <sup>1</sup>H-NMR (300 MHz, CDCl<sub>3</sub>) of 3a.

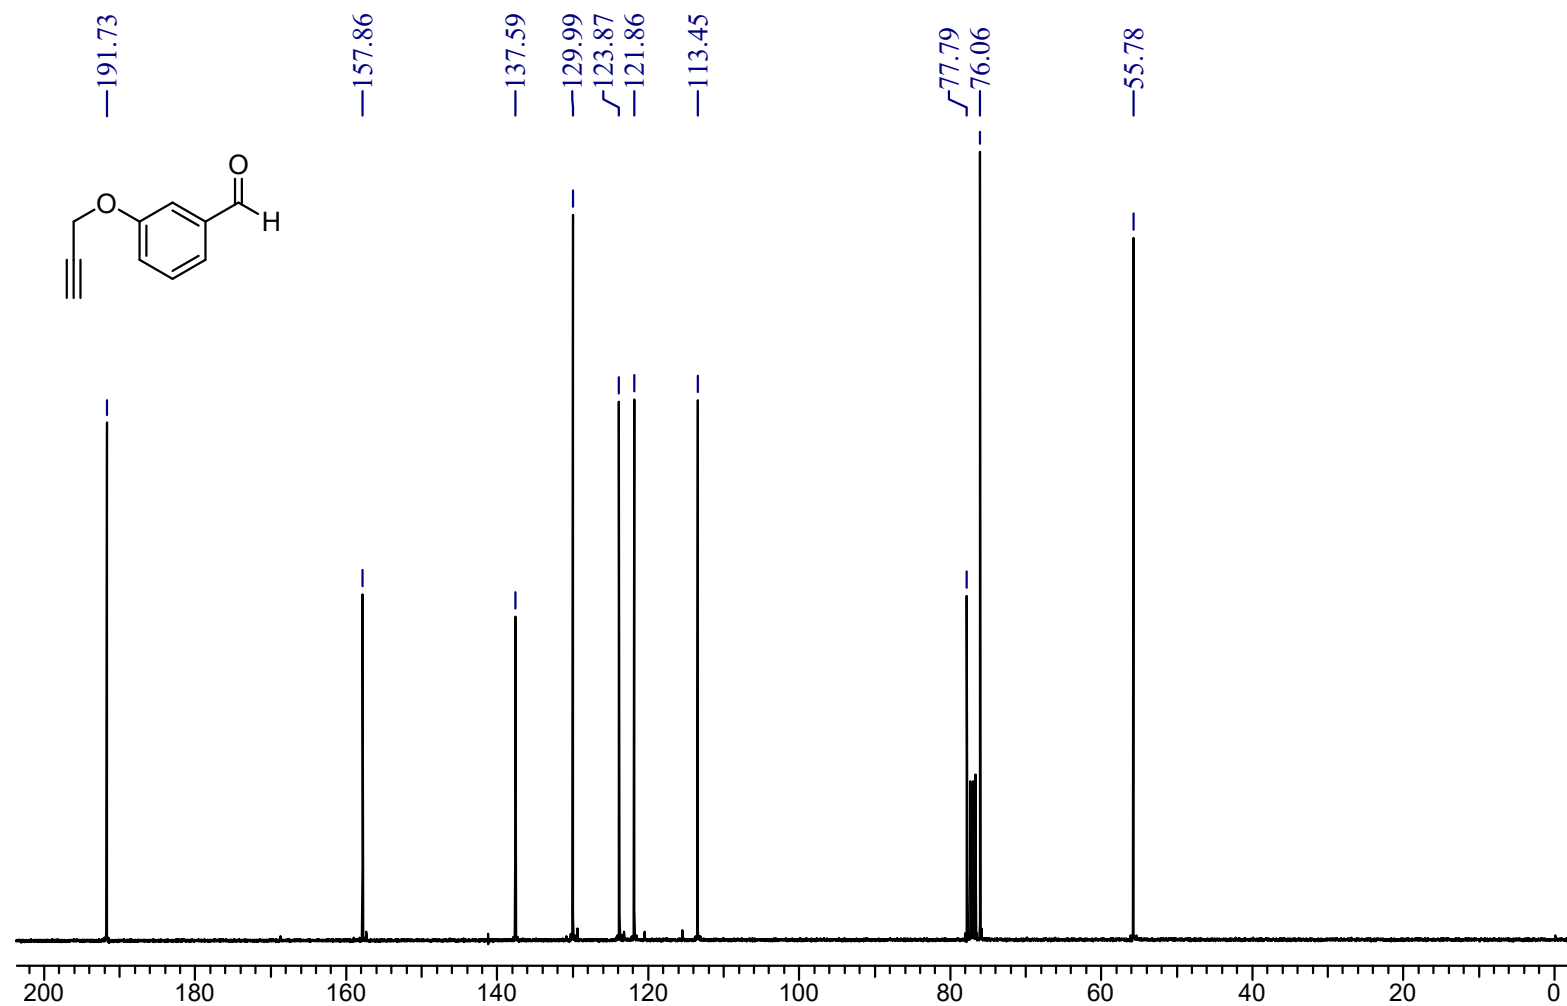

Figure S2:  $^{13}\text{C-NMR}$  (100 MHz,  $\text{CDCl}_3$ ) of 3a.

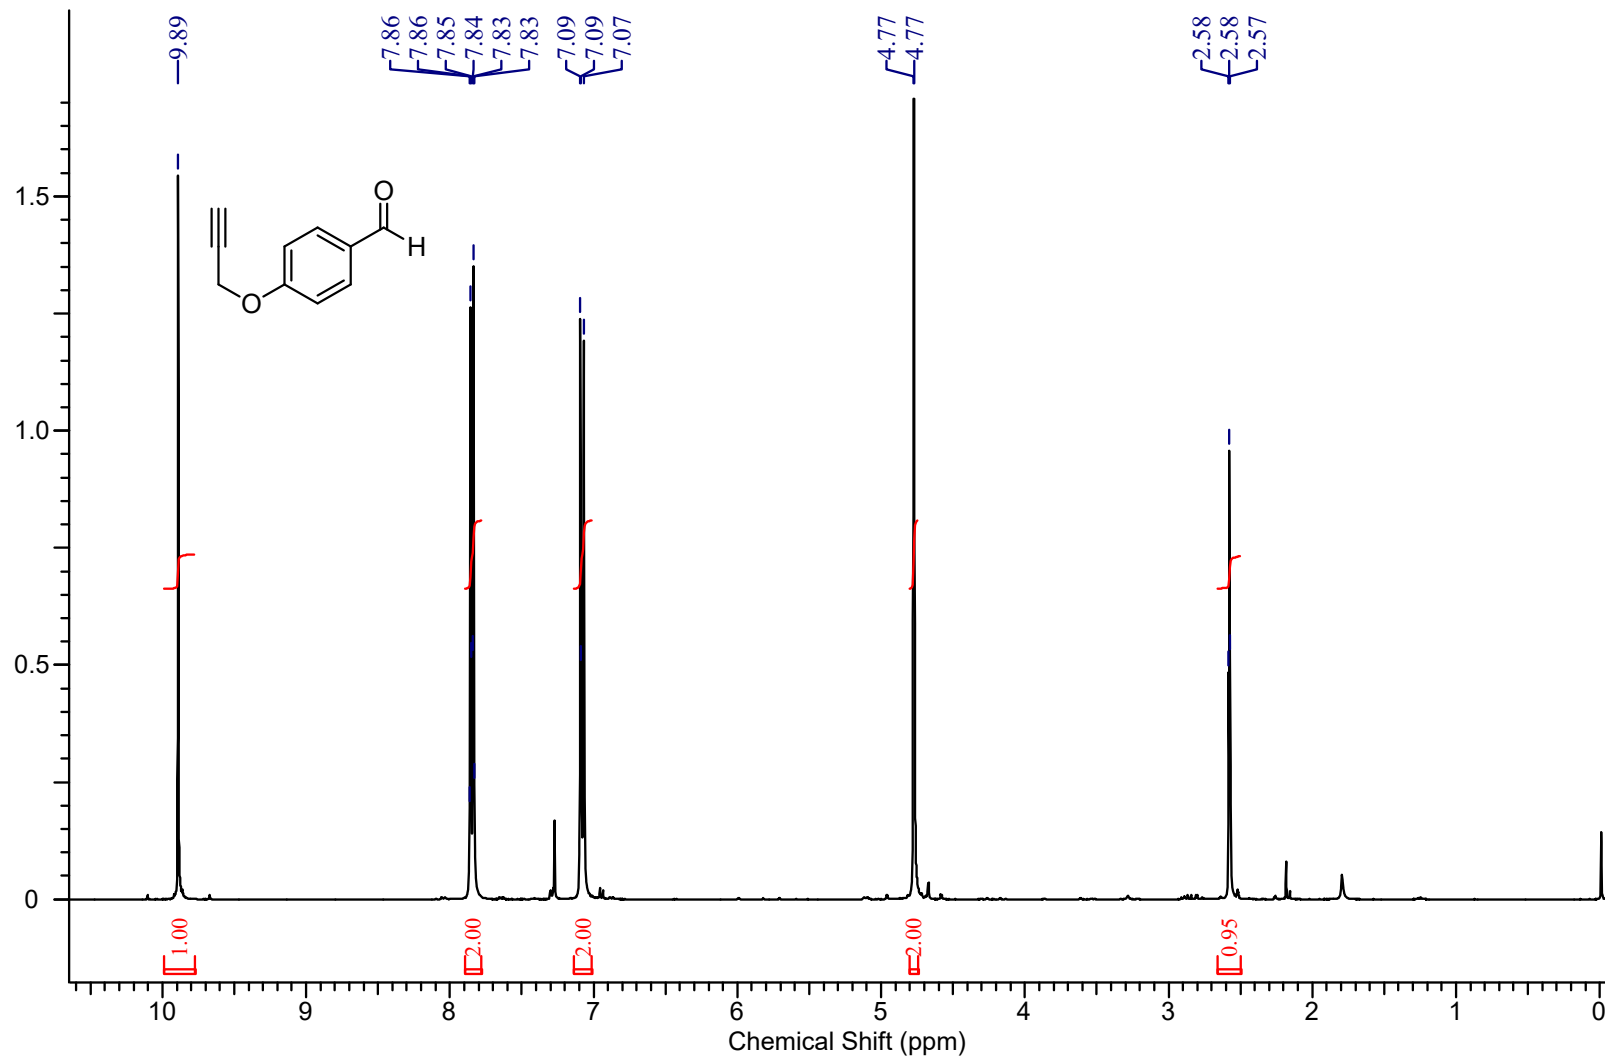

Figure S3:  $^1\text{H-NMR}$  (400 MHz,  $\text{CDCl}_3$ ) of 3b.

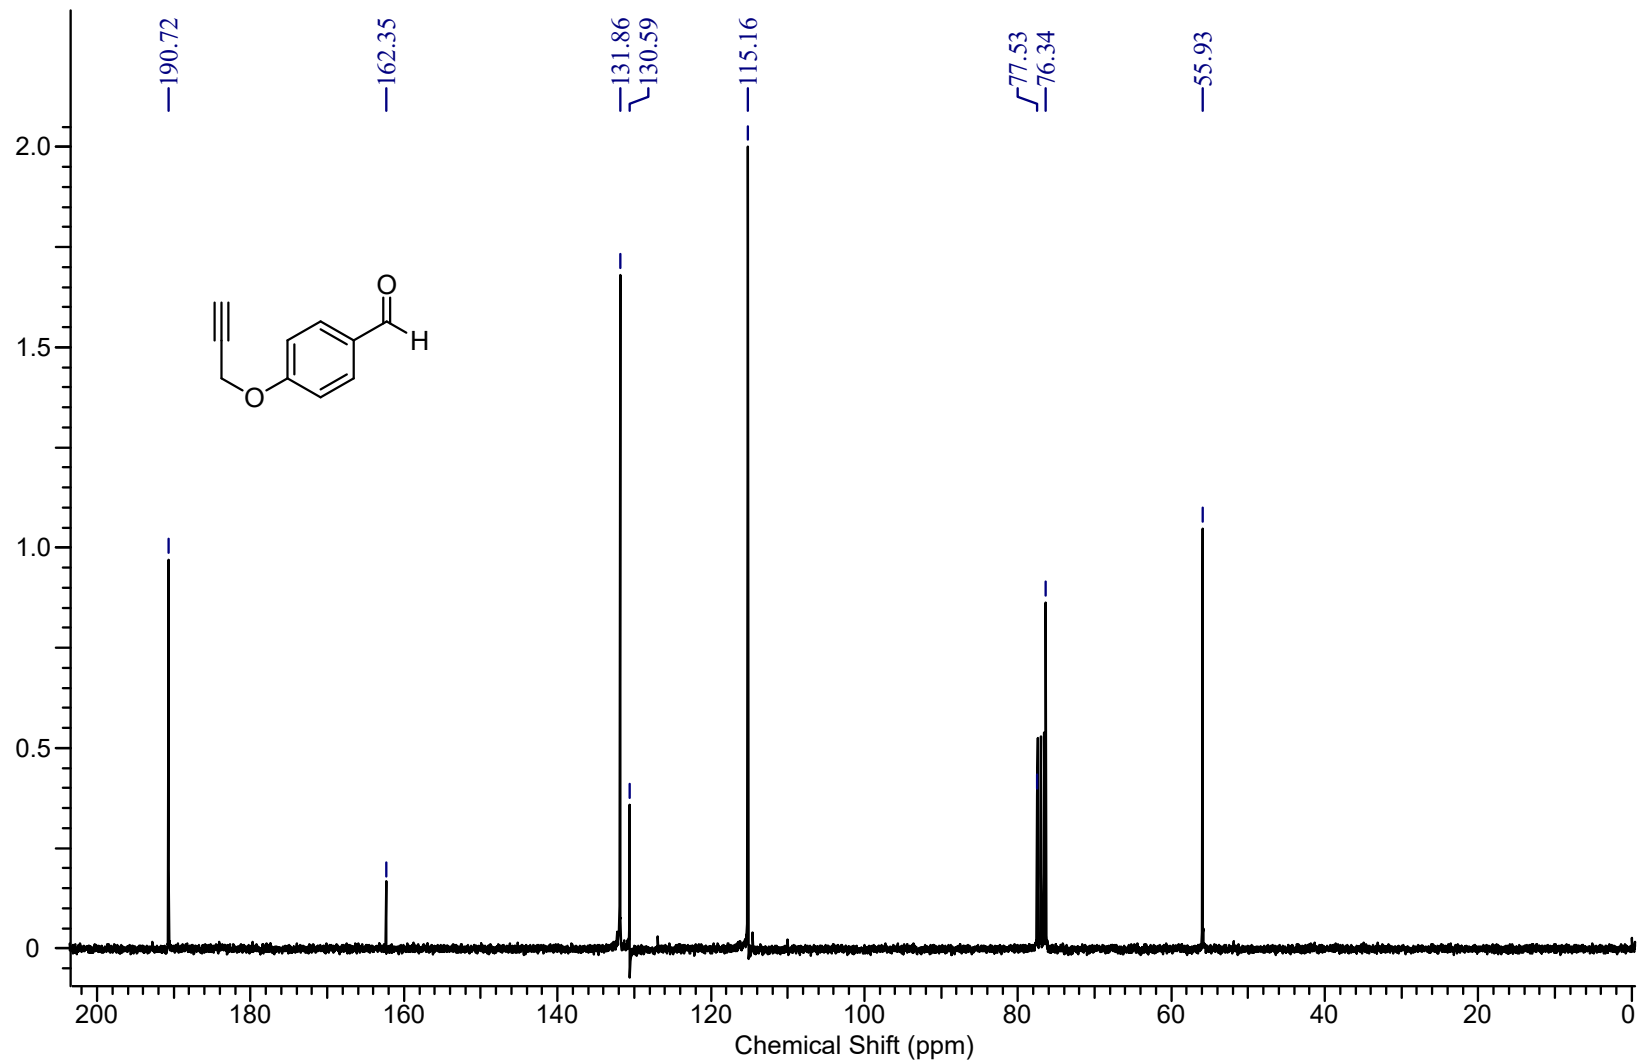

Figure S4:  $^{13}\text{C}$ -NMR (75 MHz,  $\text{CDCl}_3$ ) of 3b.

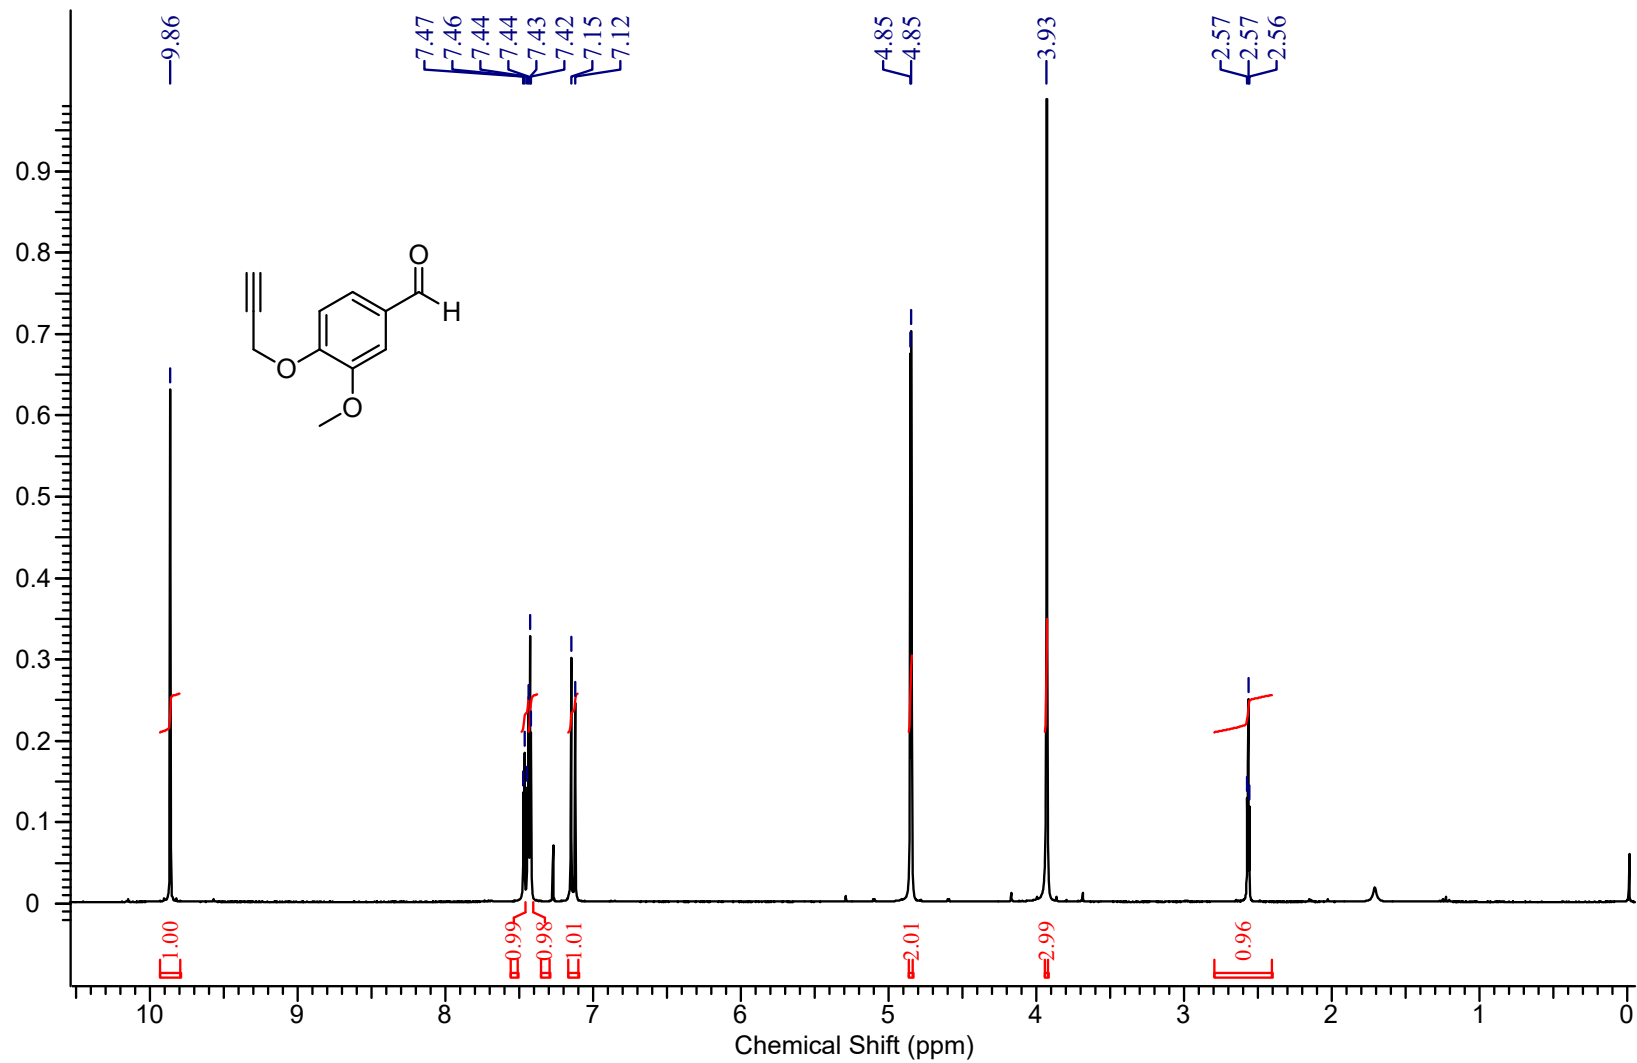

Figure S5:  $^1\text{H-NMR}$  (300 MHz,  $\text{CDCl}_3$ ) of 3c.

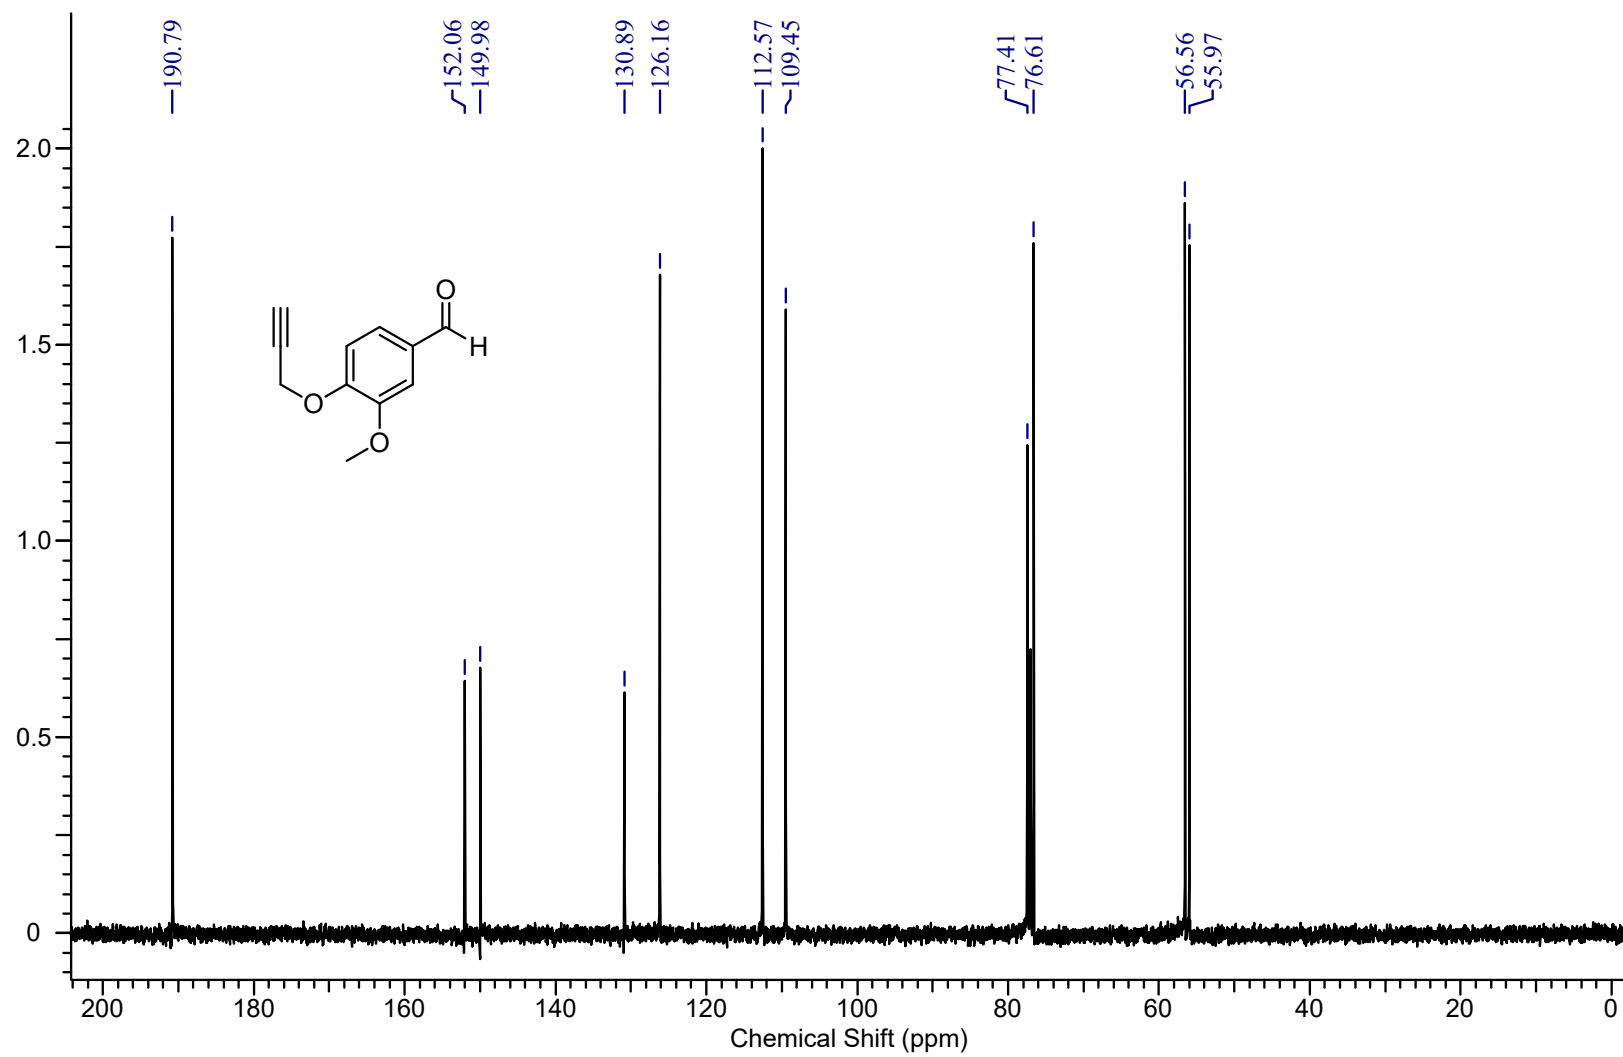

Figure S6:  $^{13}\text{C}$ -NMR (75 MHz,  $\text{CDCl}_3$ ) of 3c.

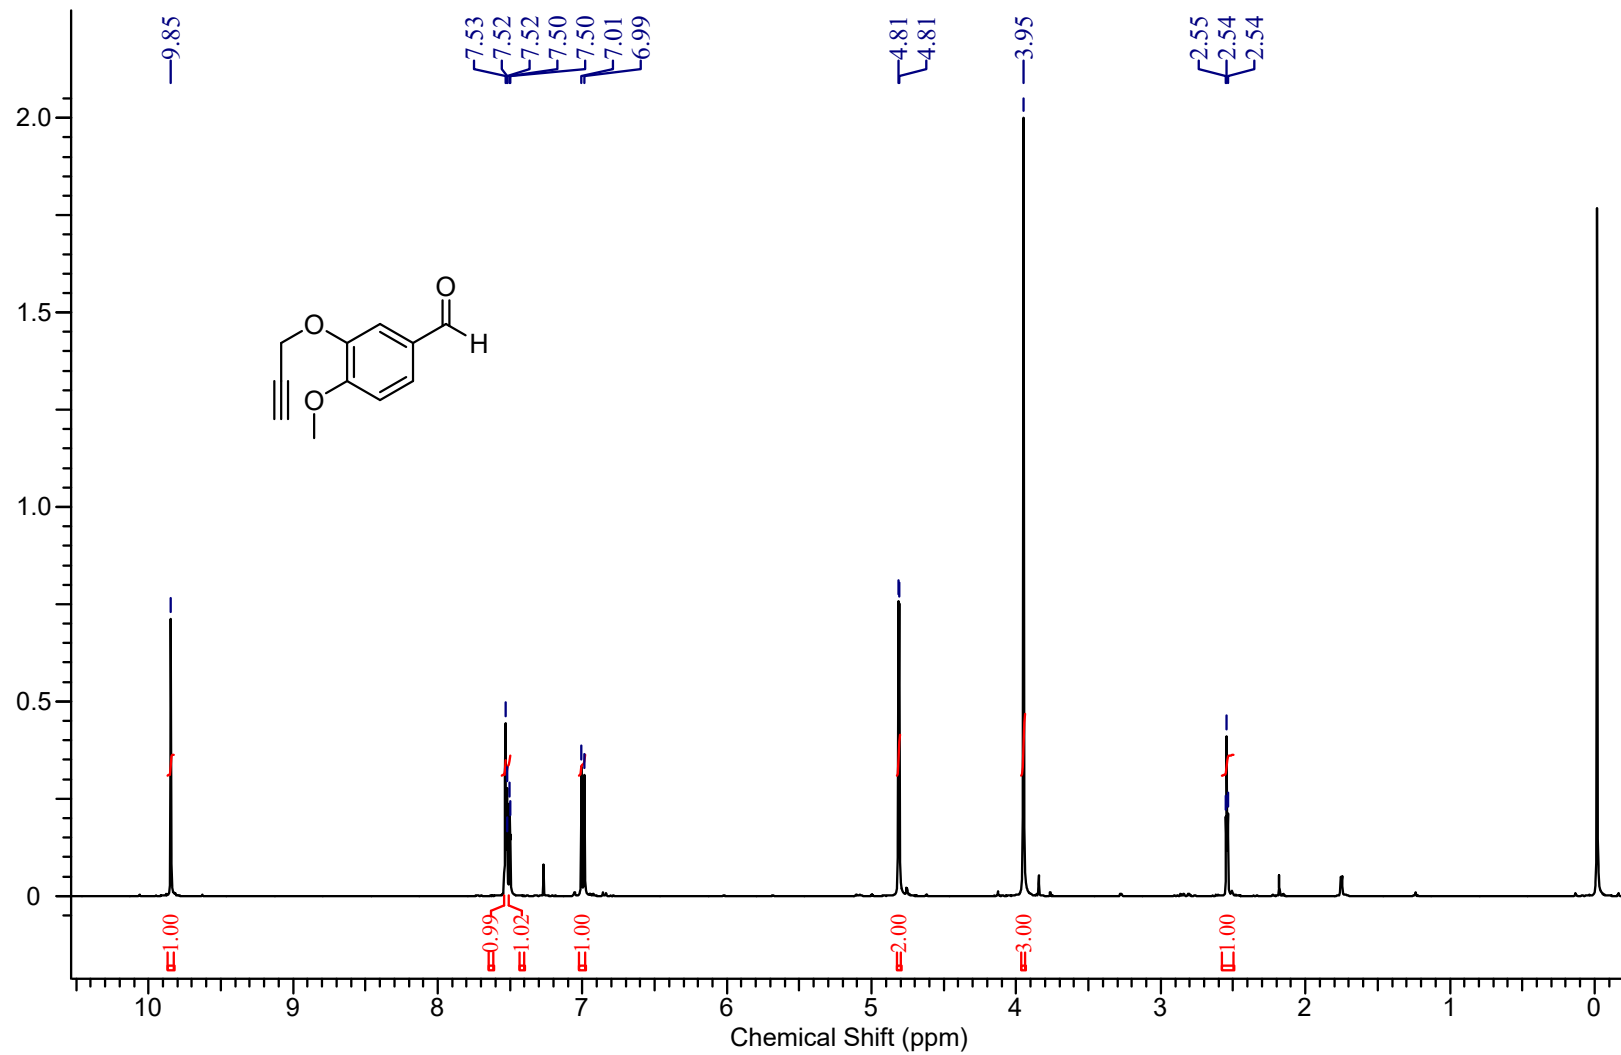

Figure S7:  $^1\text{H-NMR}$  (400 MHz,  $\text{CDCl}_3$ ) of 3d.



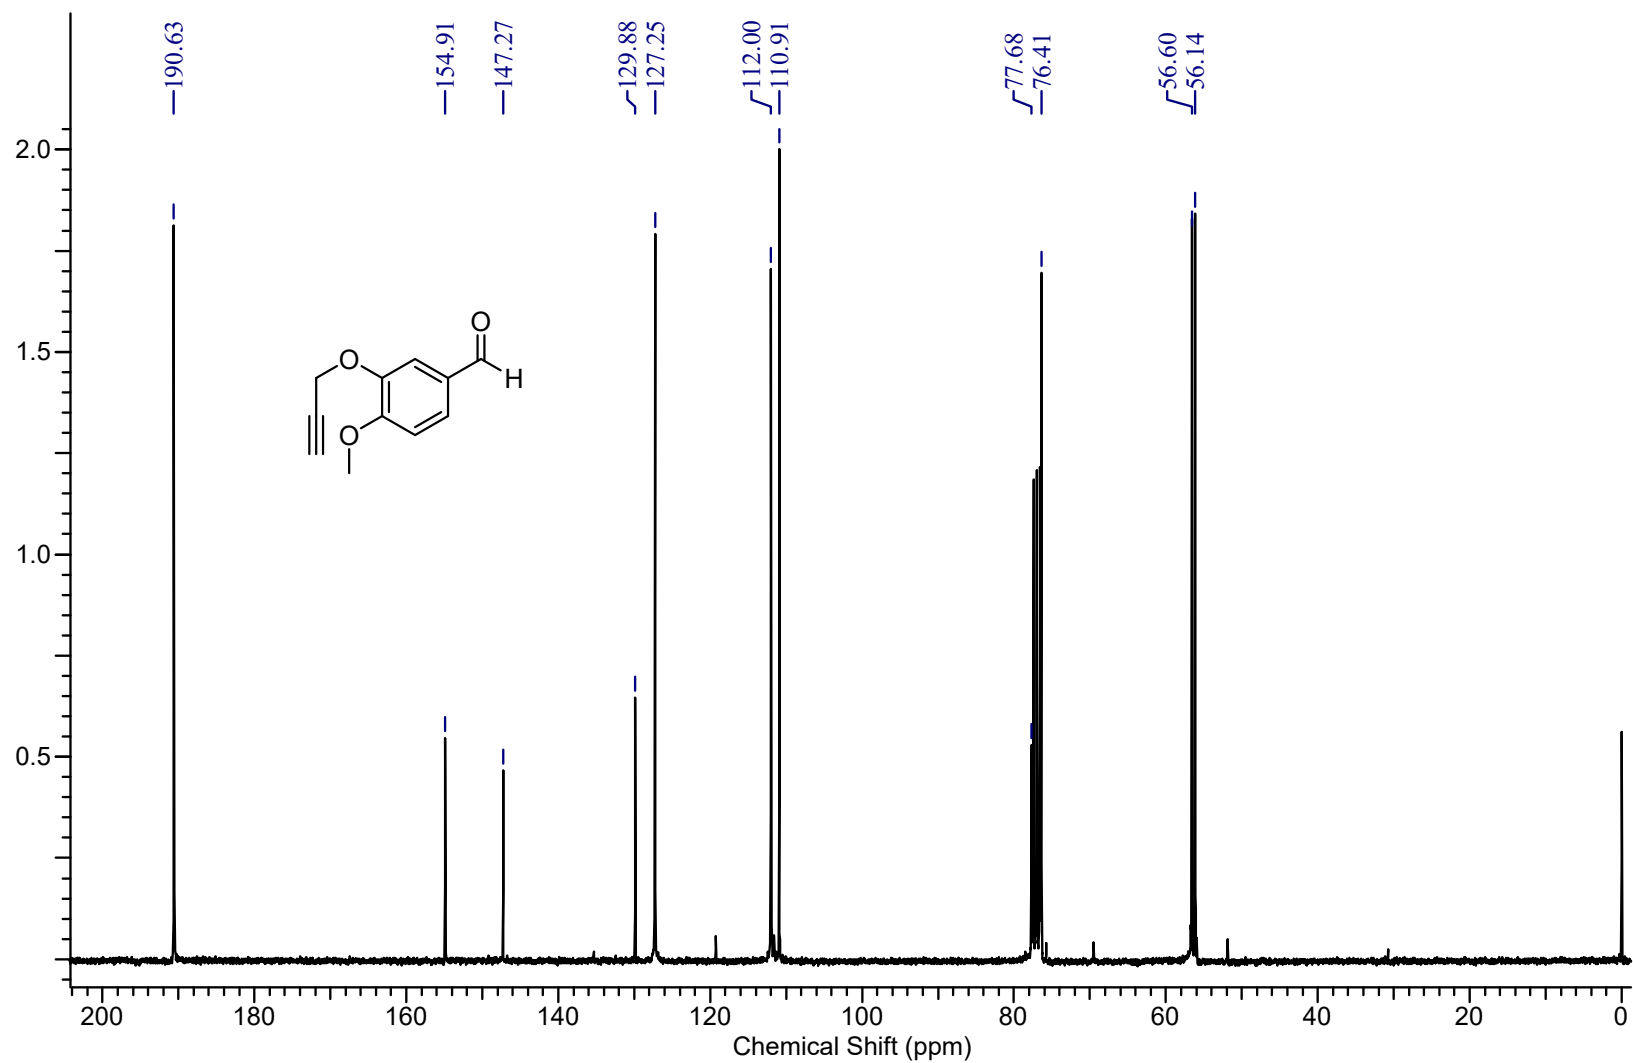

Figure S8:  $^{13}\text{C}$ -NMR (75 MHz,  $\text{CDCl}_3$ ) of 3d.

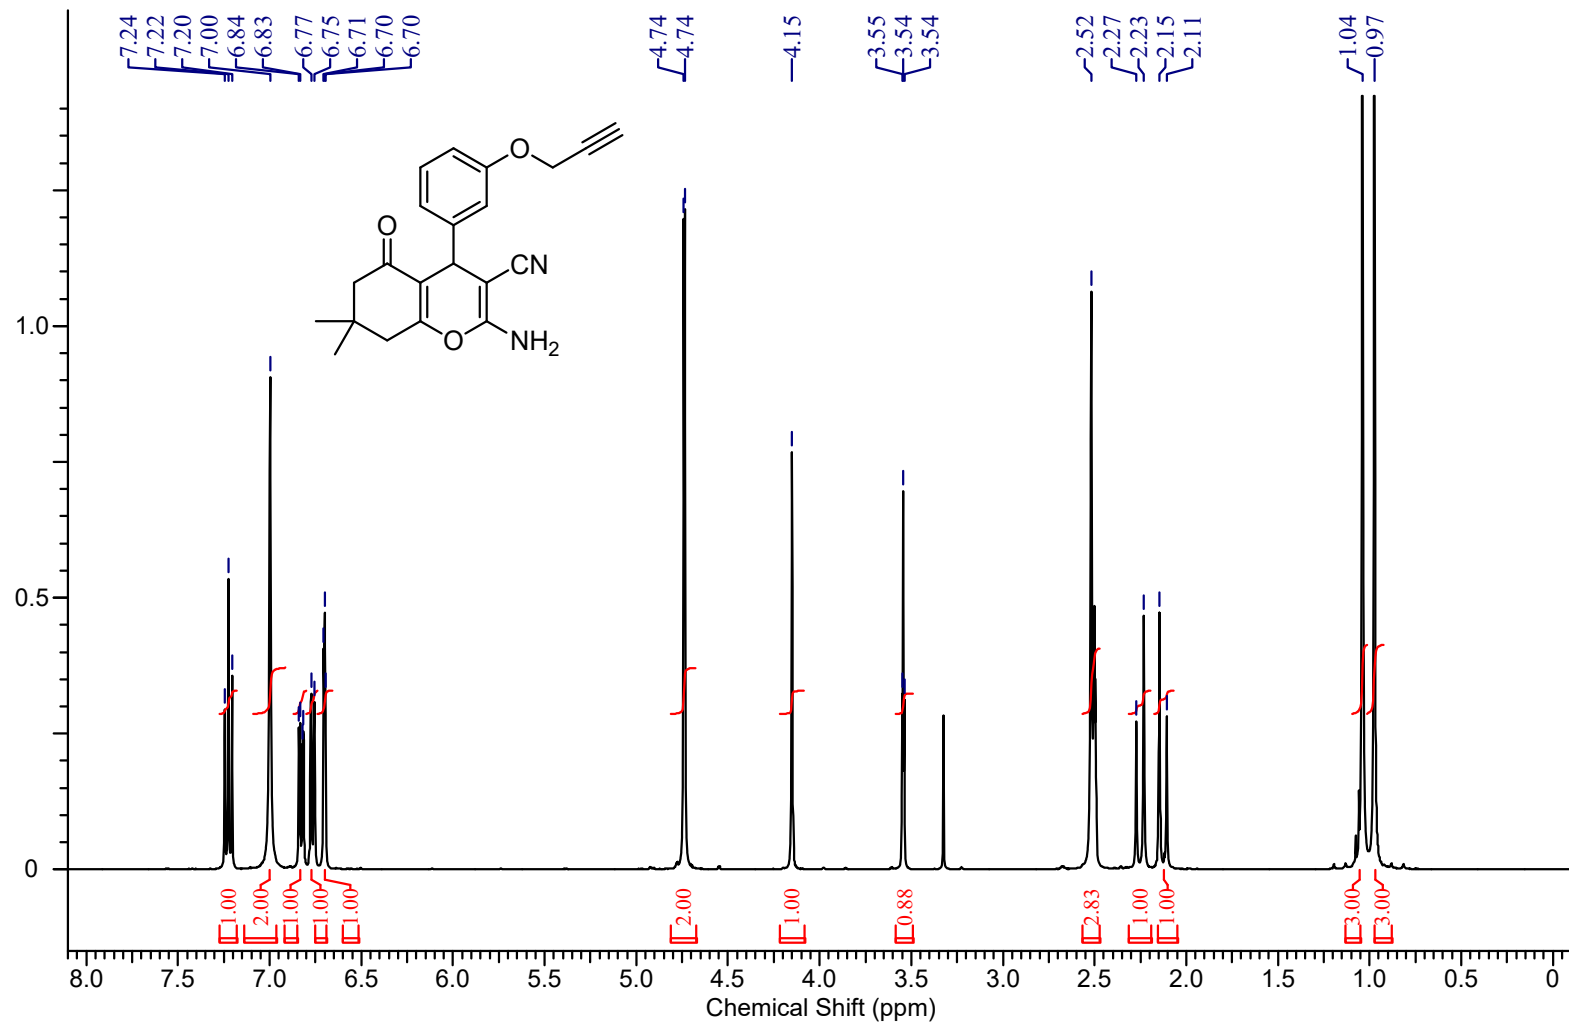

Figure S9: <sup>1</sup>H-NMR (400 MHz, DMSO-d<sub>6</sub>) of 6a.

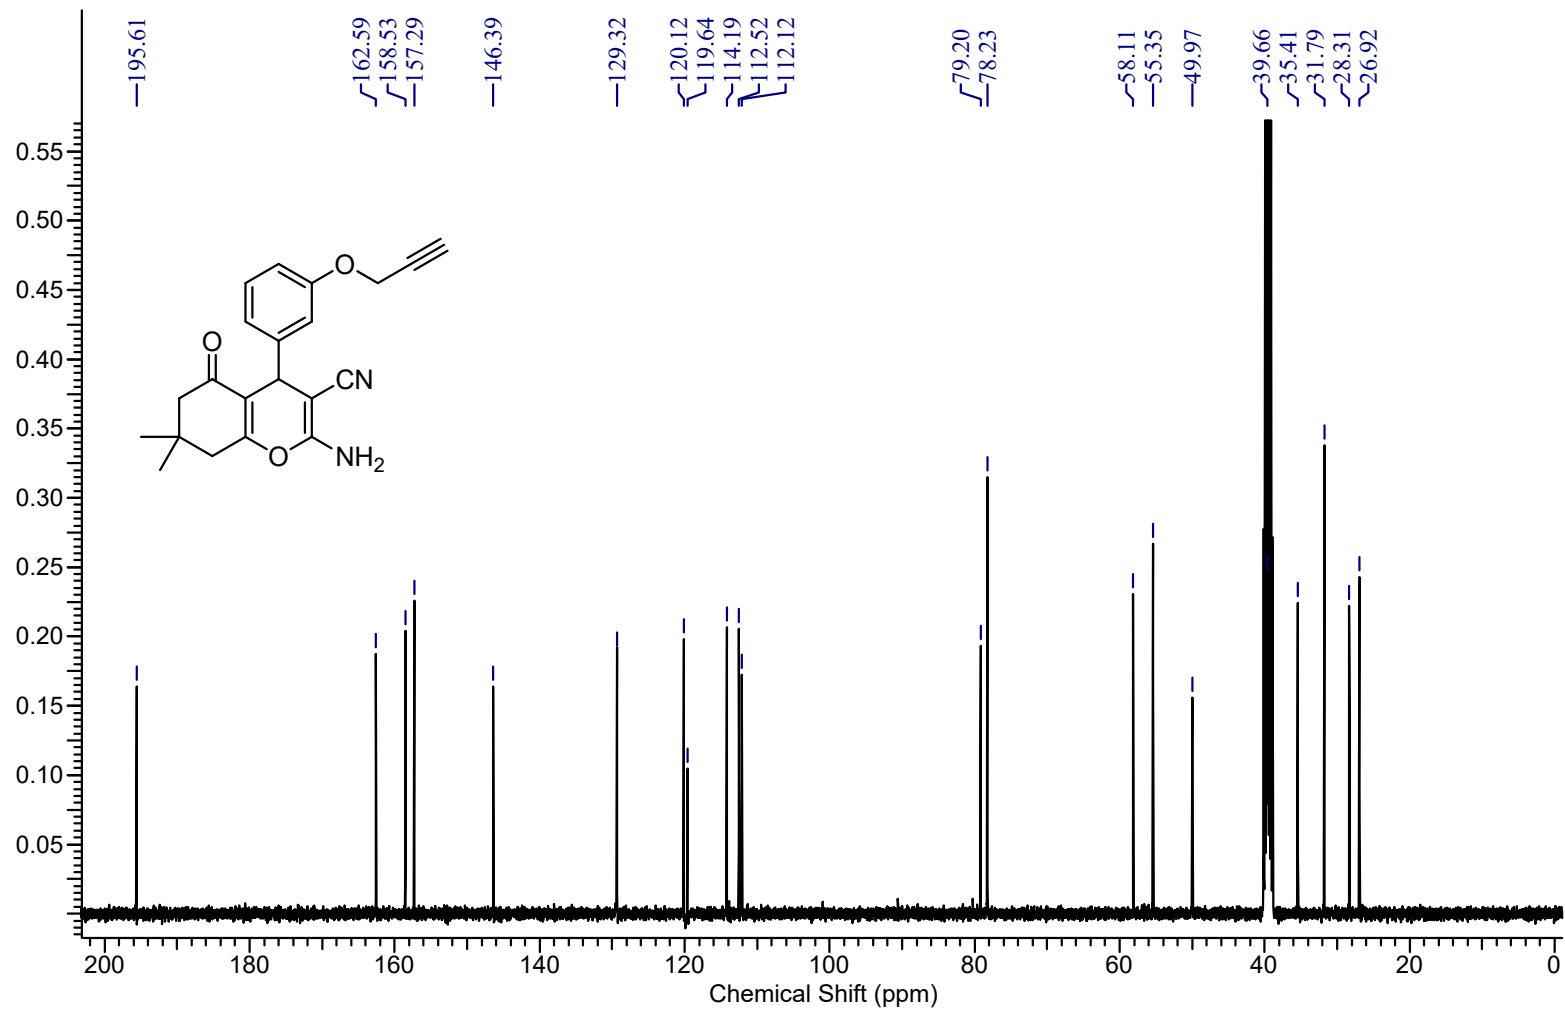

Figure S10:  $^{13}\text{C}$ -NMR (100 MHz,  $\text{DMSO-d}_6$ ) of 6a.

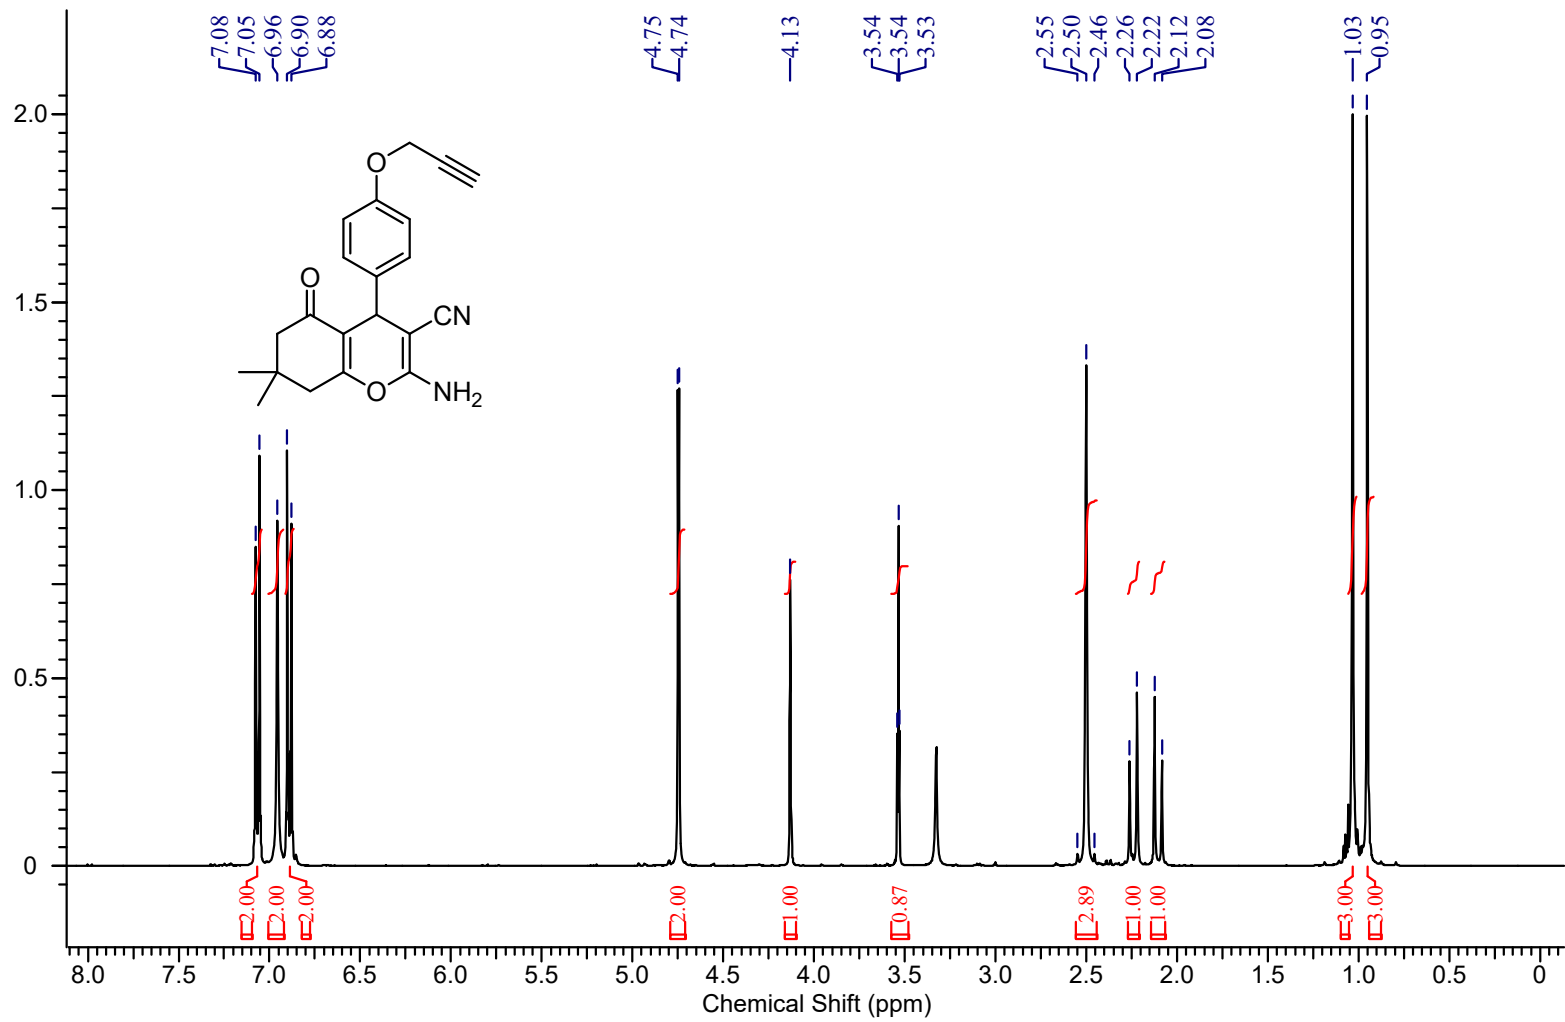

Figure S11:  $^1\text{H-NMR}$  (400 MHz,  $\text{DMSO-d}_6$ ) of 6b.

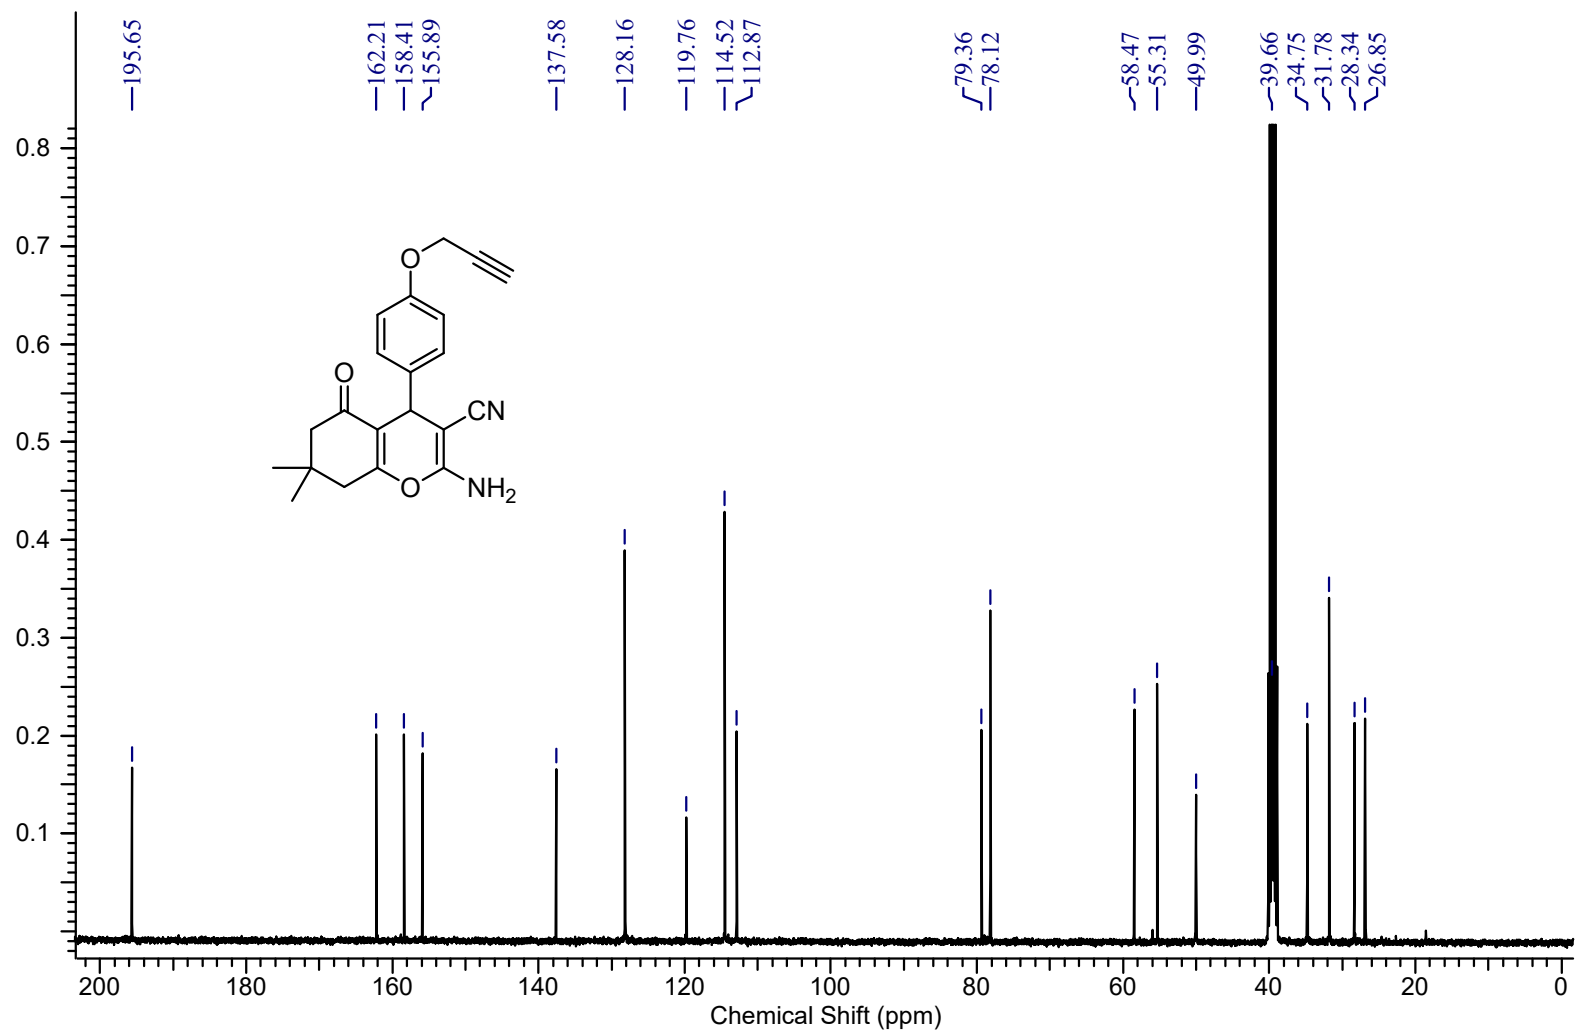

Figure S12: <sup>13</sup>C-NMR (100 MHz, DMSO-d<sub>6</sub>) of 6b.

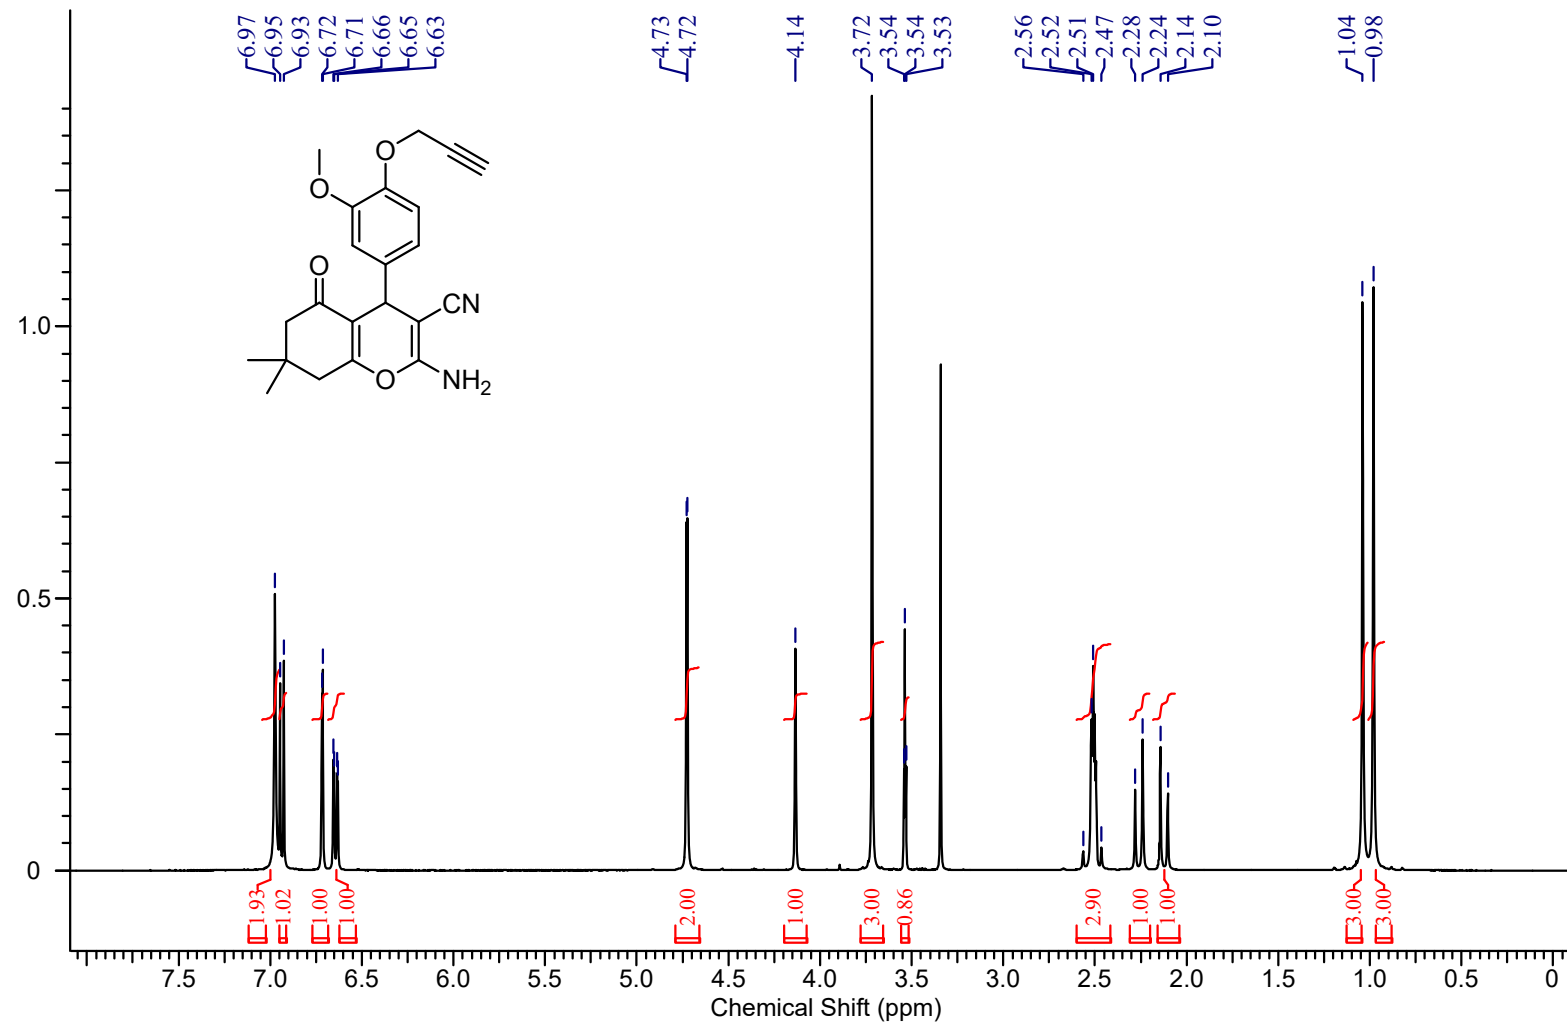

Figure S13: <sup>1</sup>H-NMR (400 MHz, DMSO-d<sub>6</sub>) of 6c.

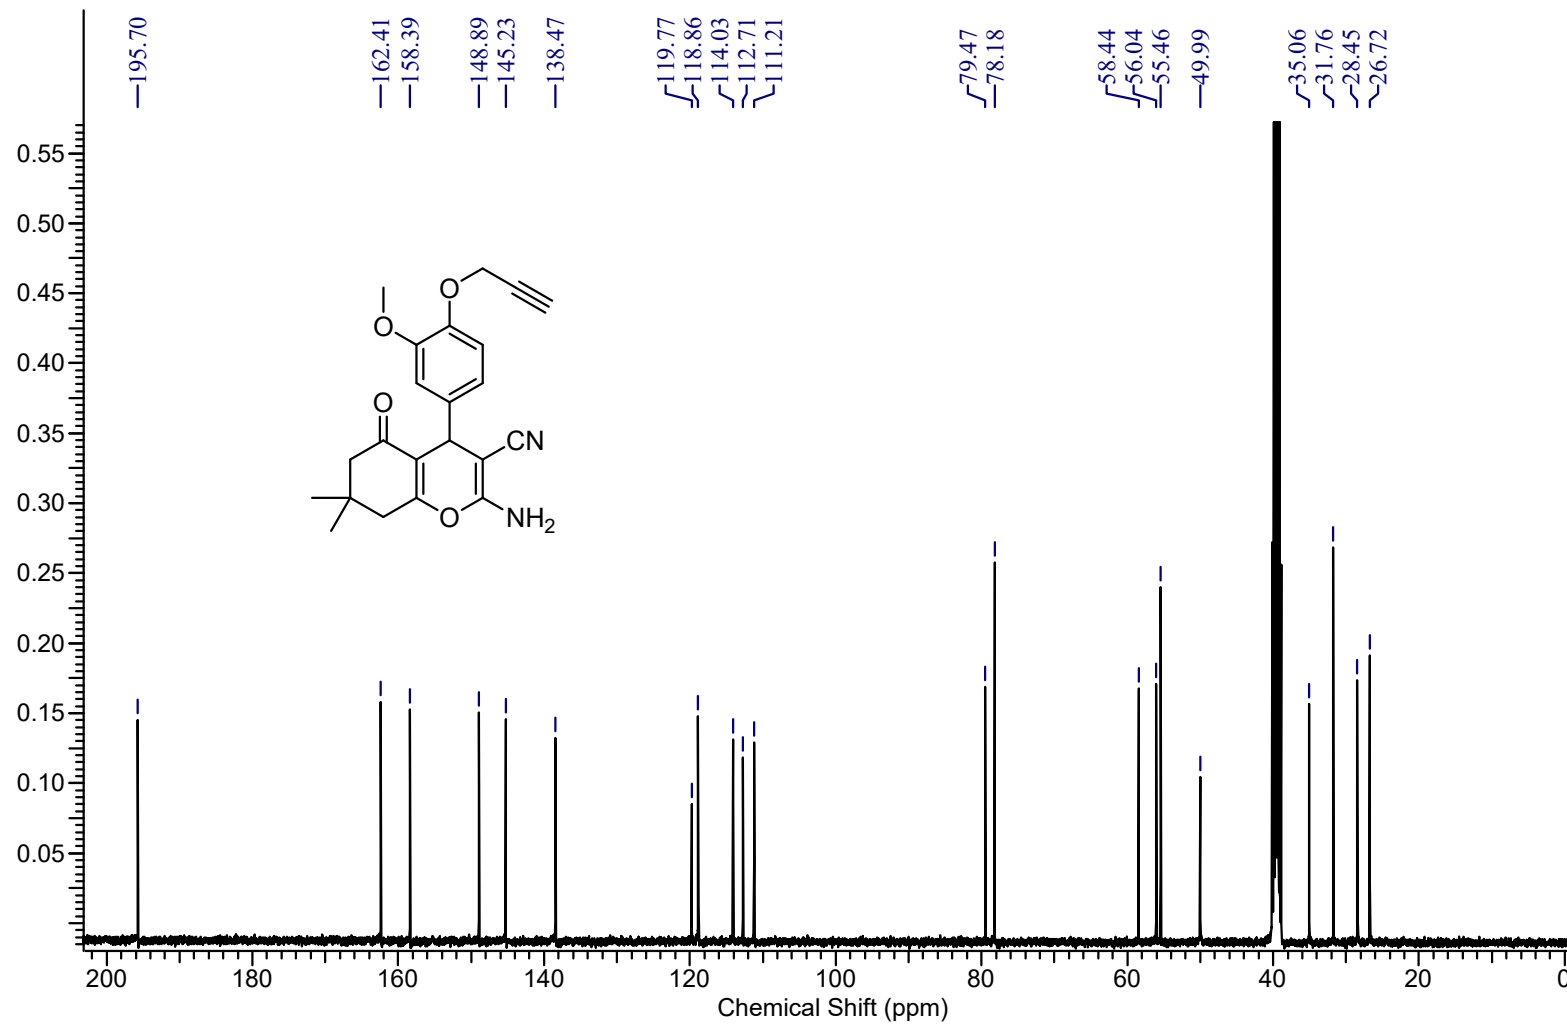

Figure S14:  $^{13}\text{C}$ -NMR (100 MHz,  $\text{DMSO-d}_6$ ) of 6c.

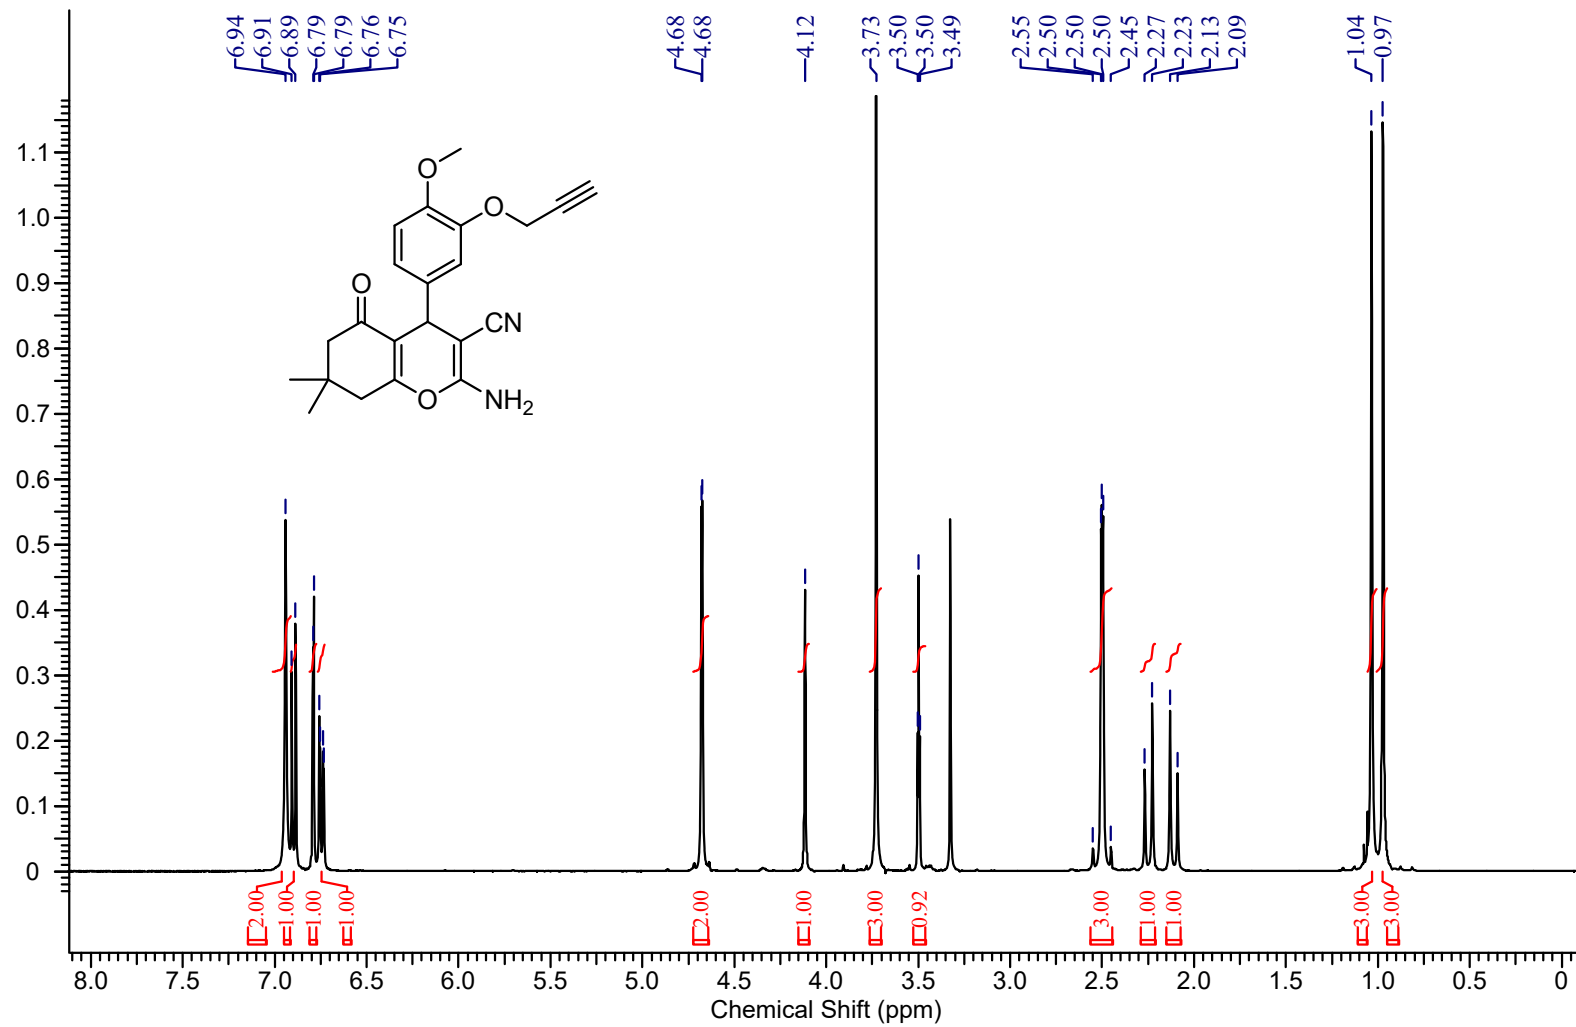

Figure S15:  $^1\text{H-NMR}$  (400 MHz,  $\text{DMSO-d}_6$ ) of 6d.



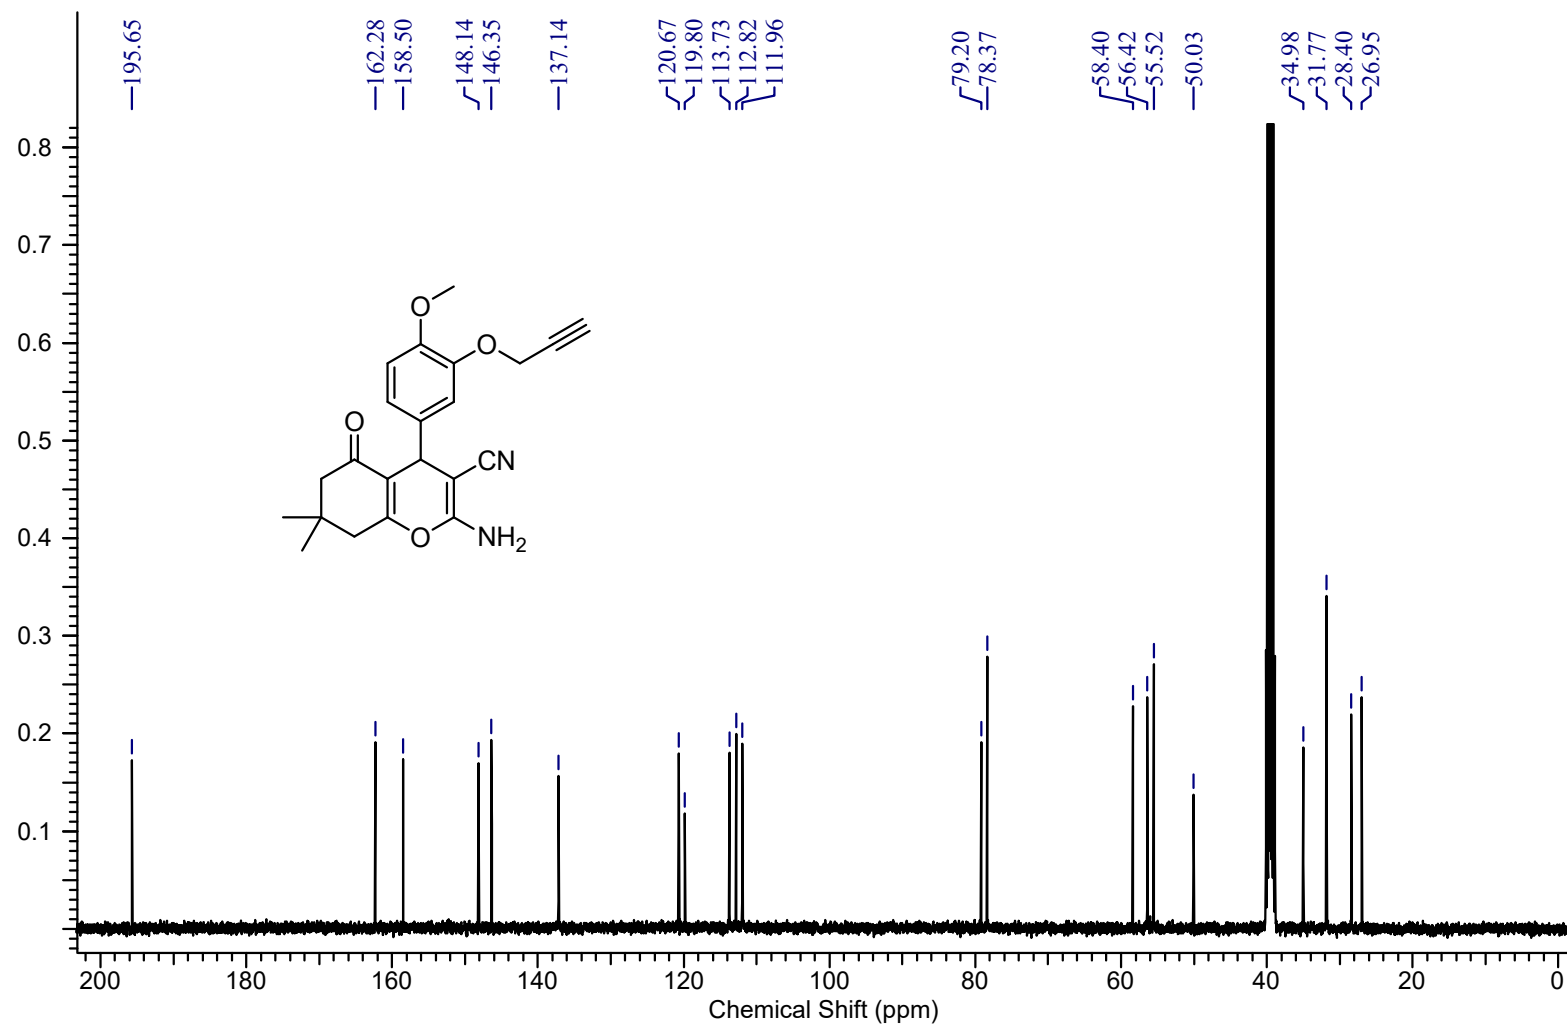

Figure S16:  $^{13}\text{C}$ -NMR (100 MHz,  $\text{DMSO-d}_6$ ) of 6d.

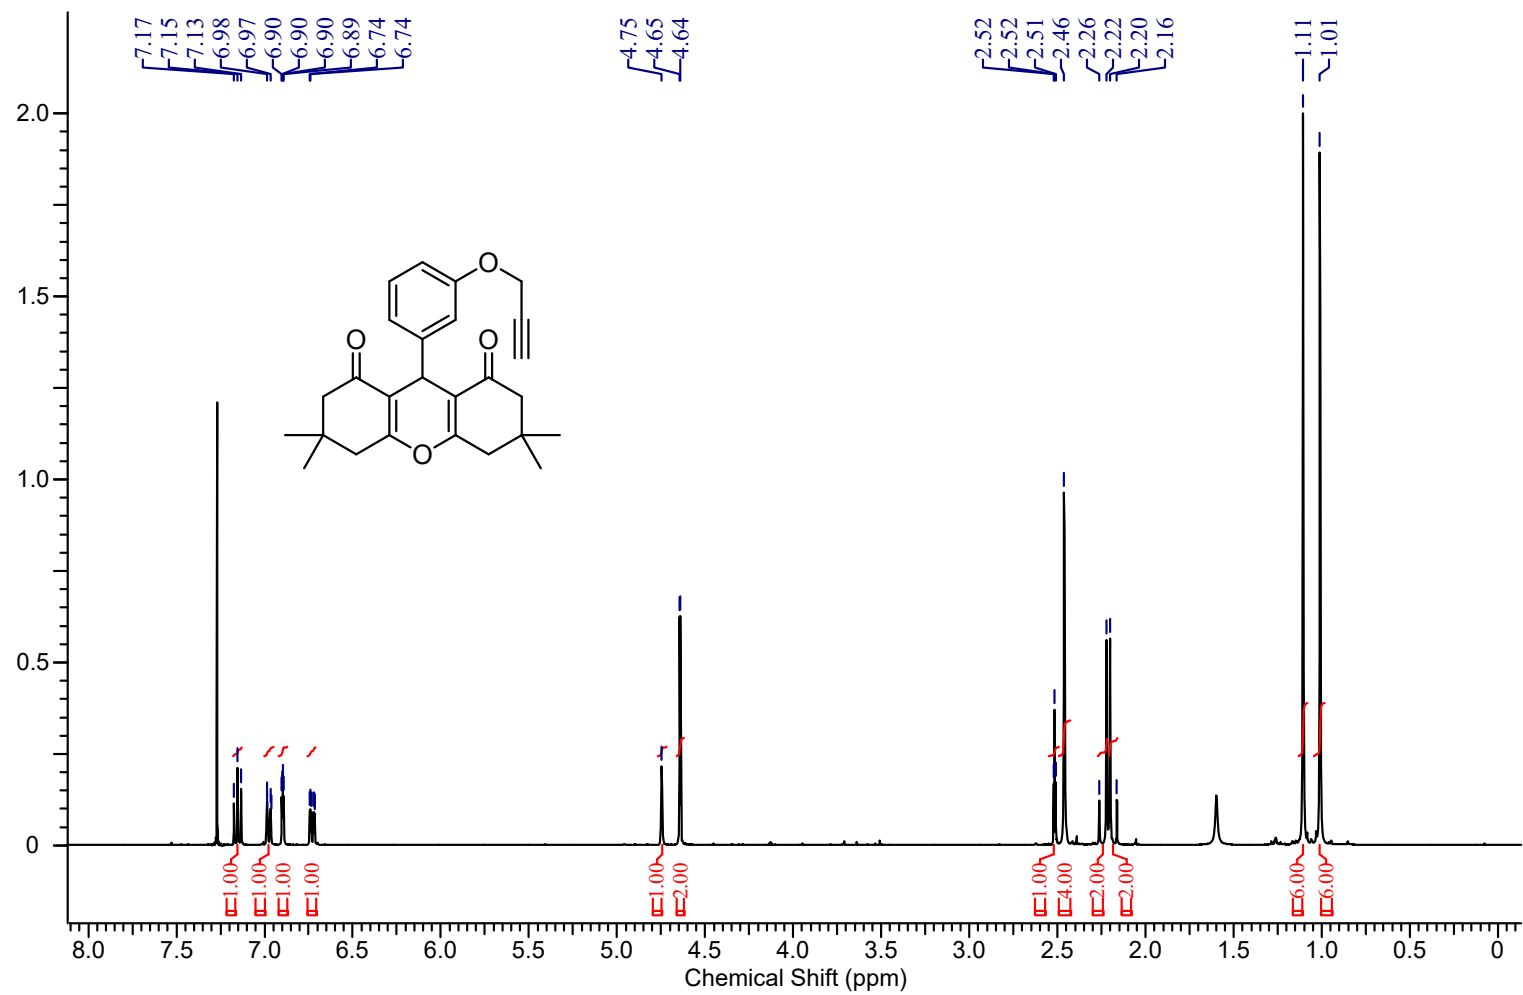

Figure S17: <sup>1</sup>H-NMR (400 MHz, CDCl<sub>3</sub>) of 8a.

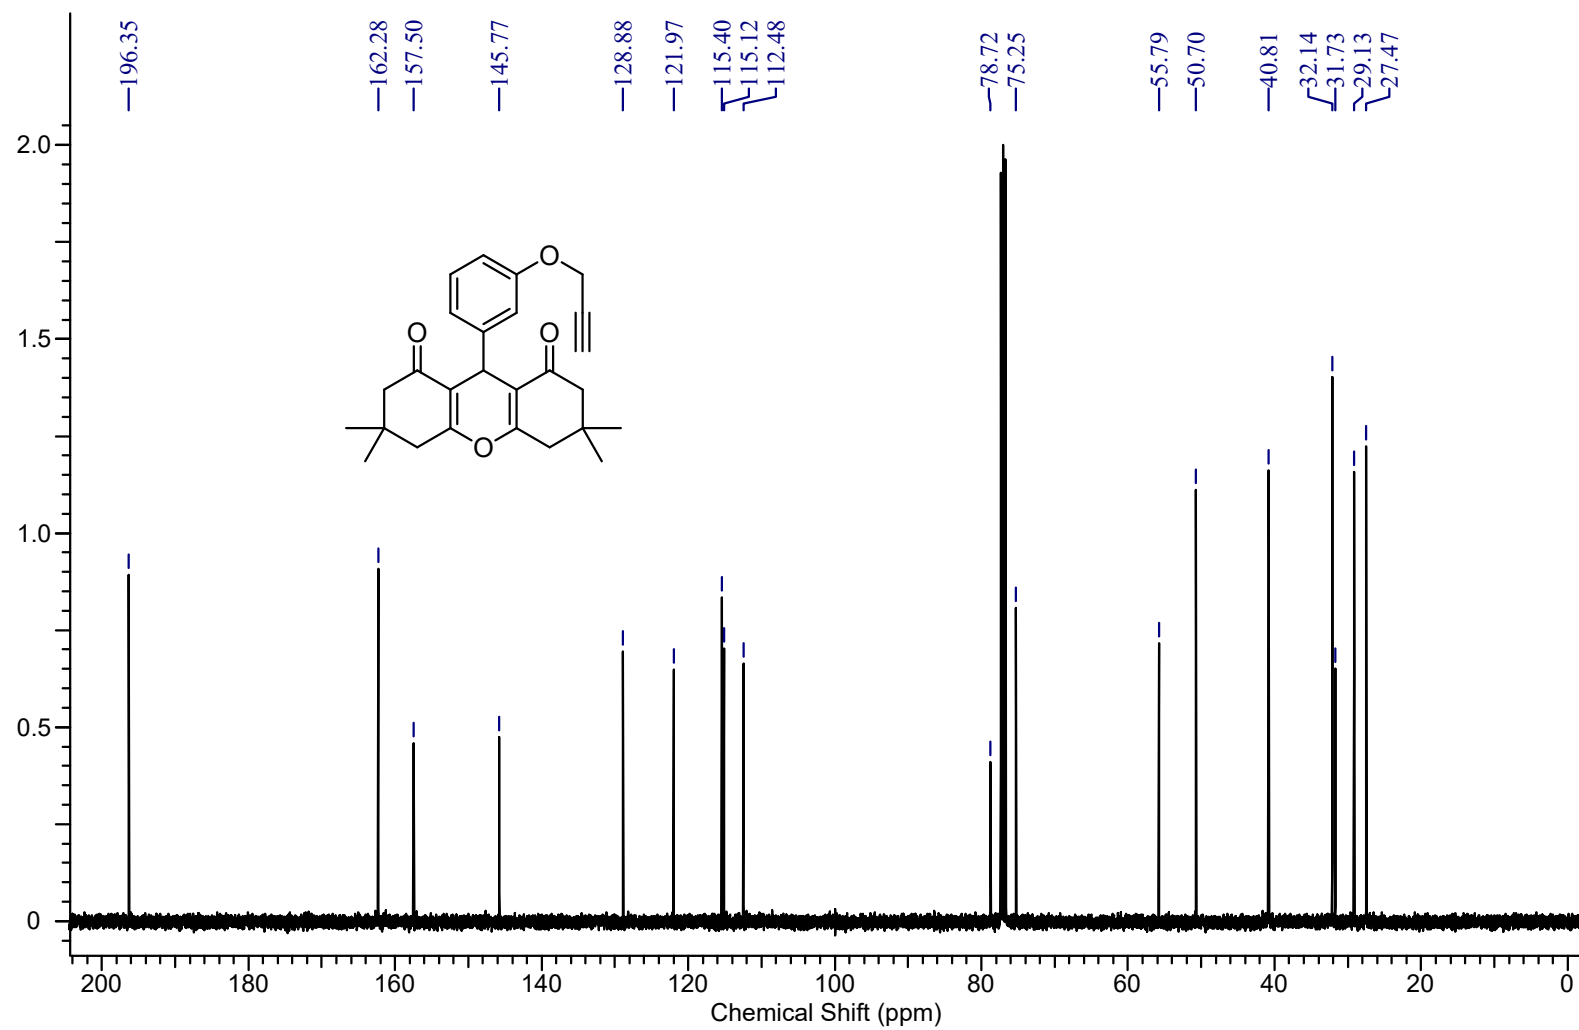

Figure S18:  $^{13}\text{C}$ -NMR (100 MHz,  $\text{CDCl}_3$ ) of 8a.

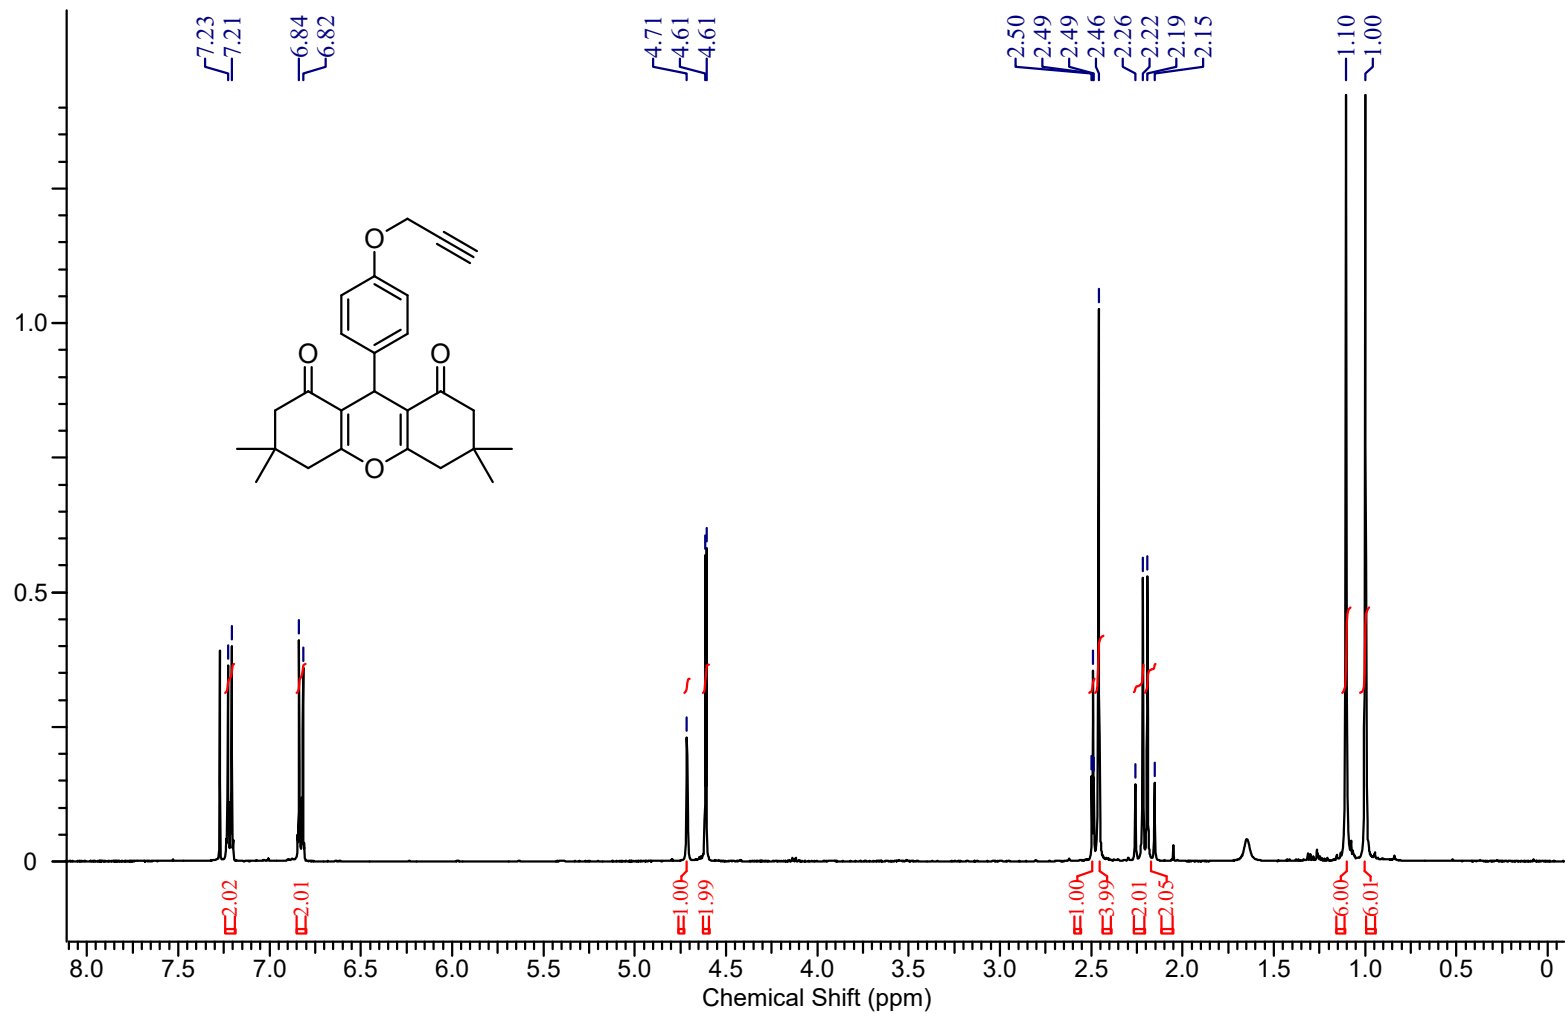

Figure S19:  $^1\text{H-NMR}$  (400 MHz,  $\text{CDCl}_3$ ) of 8b.

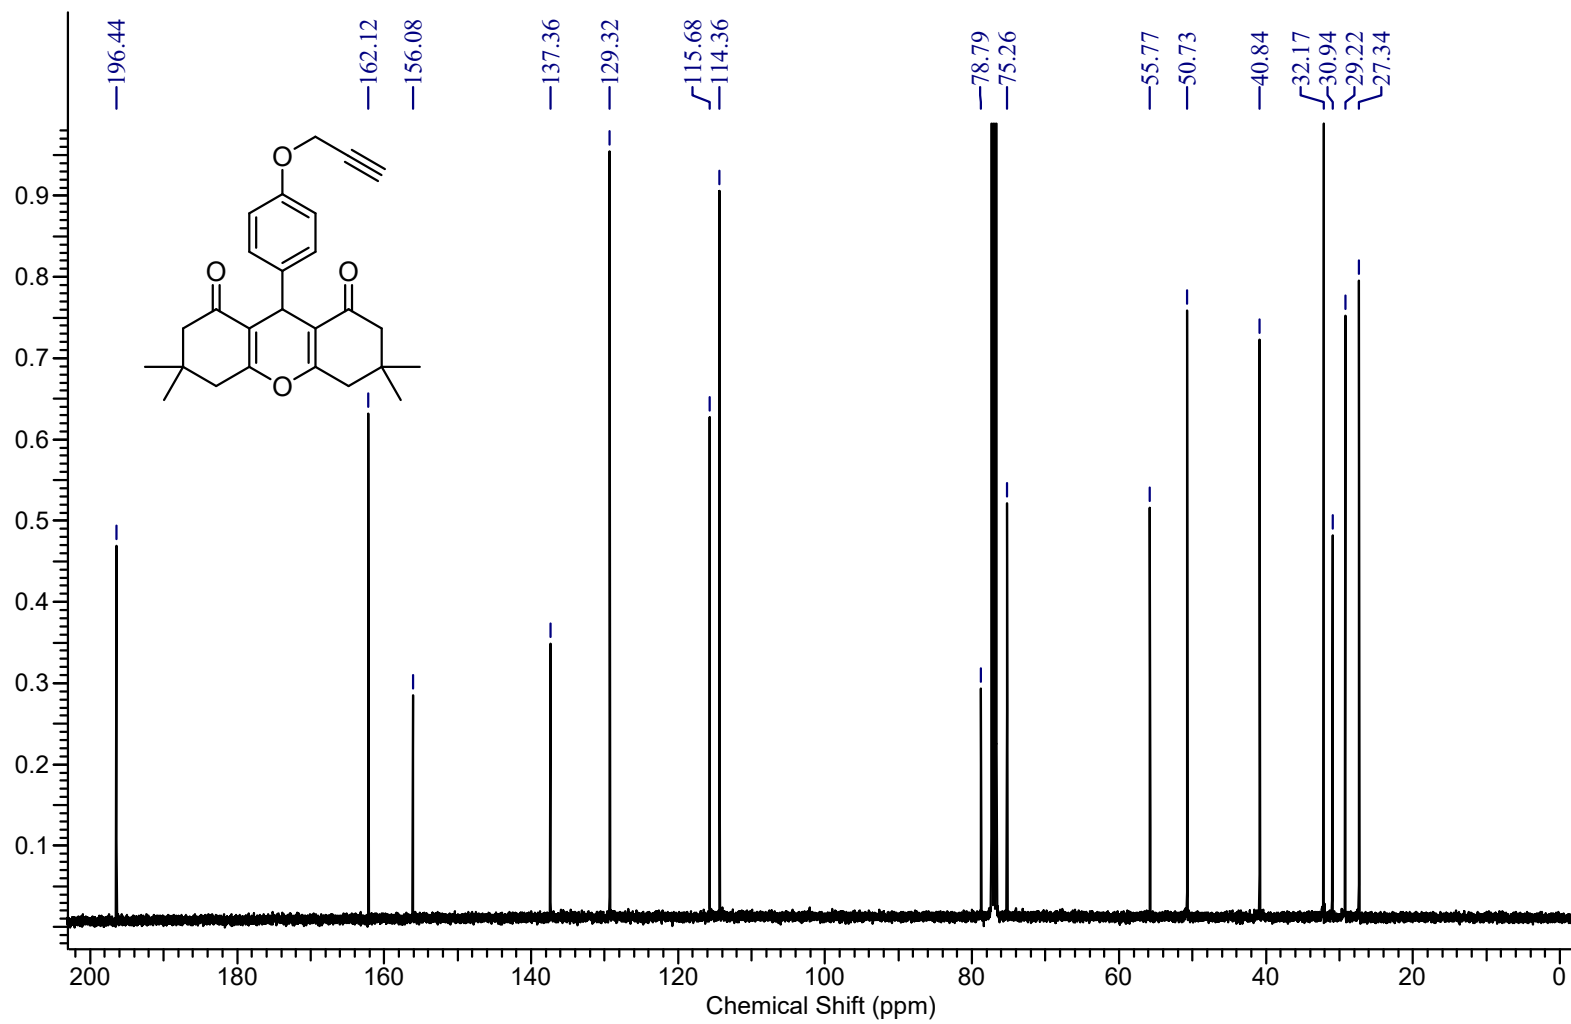

Figure S20:  $^{13}\text{C}$ -NMR (100 MHz,  $\text{CDCl}_3$ ) of 8b.

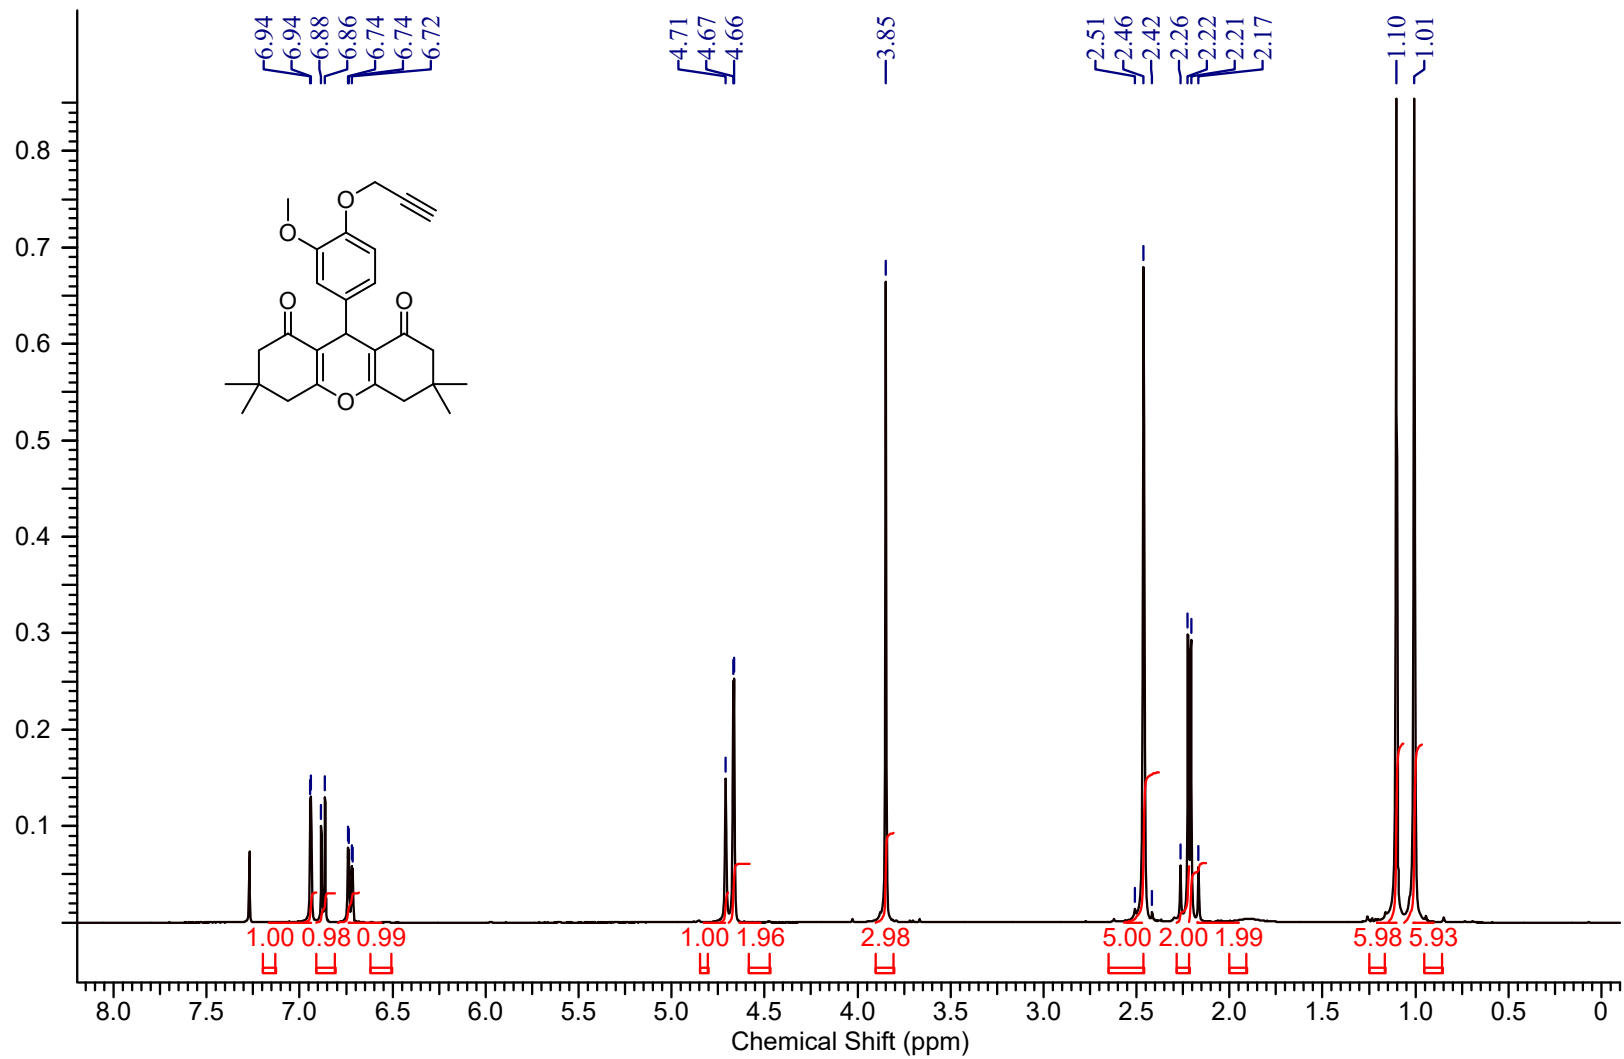

Figure S21:  $^1\text{H-NMR}$  (400 MHz,  $\text{CDCl}_3$ ) of 8c.

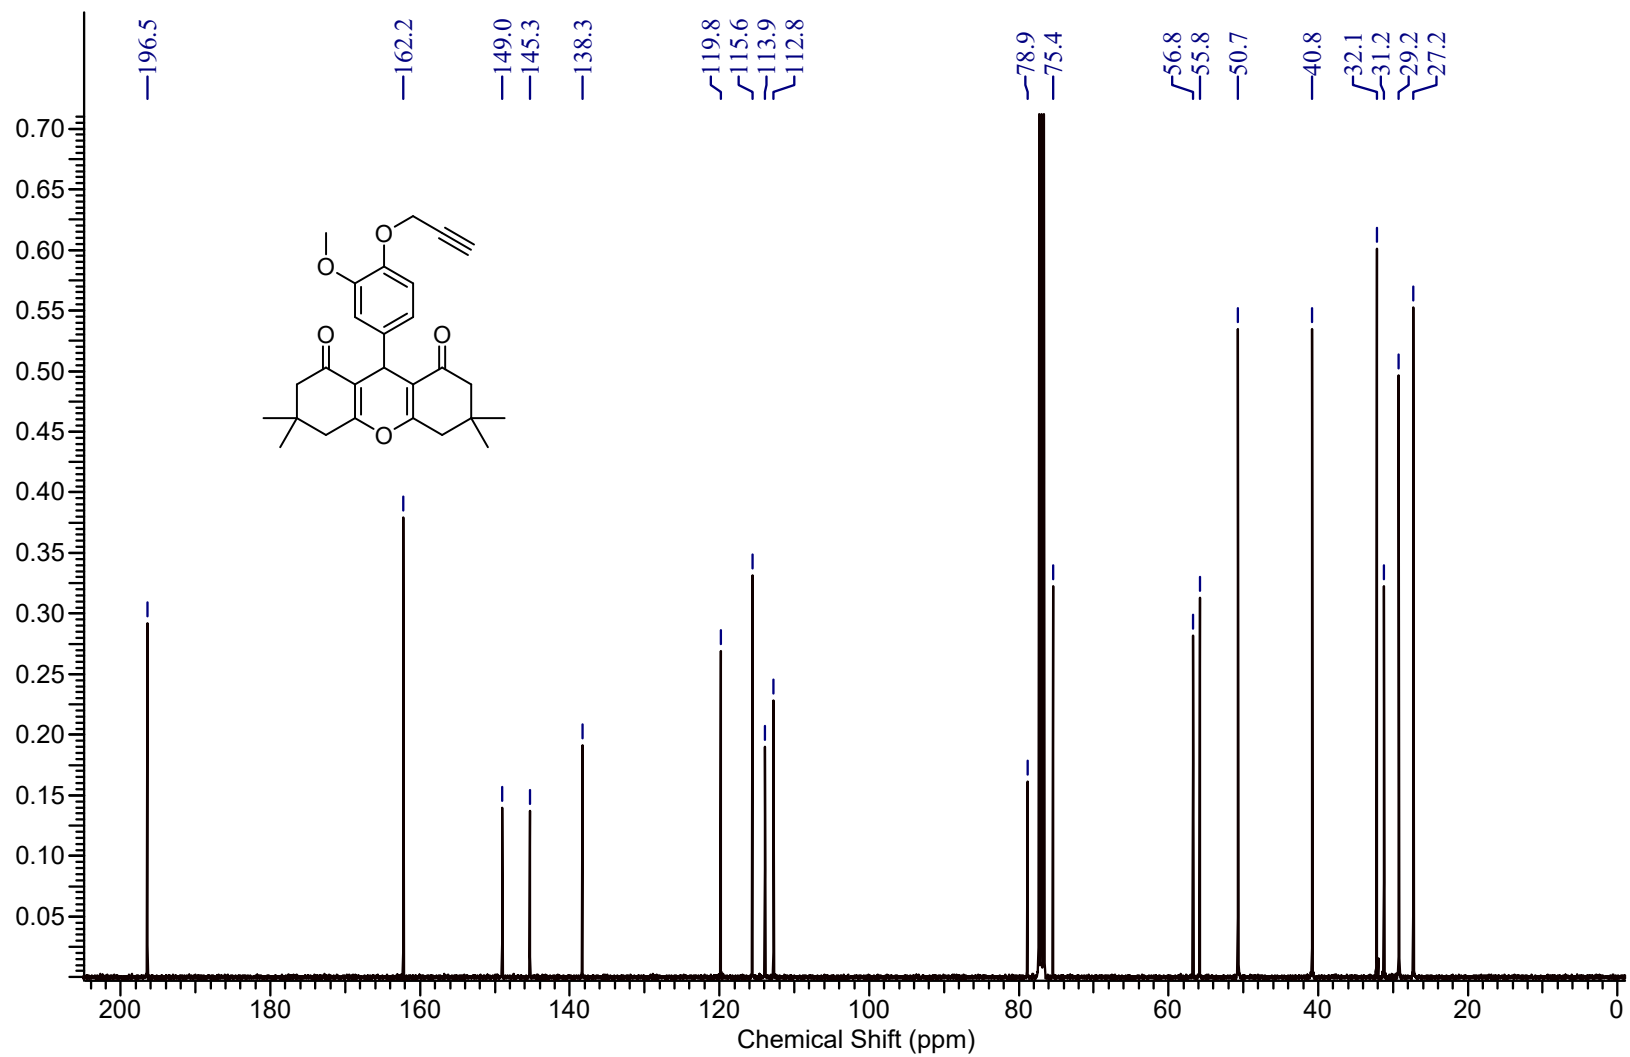

Figure S22:  $^{13}\text{C}$ -NMR (100 MHz,  $\text{CDCl}_3$ ) of 8c.

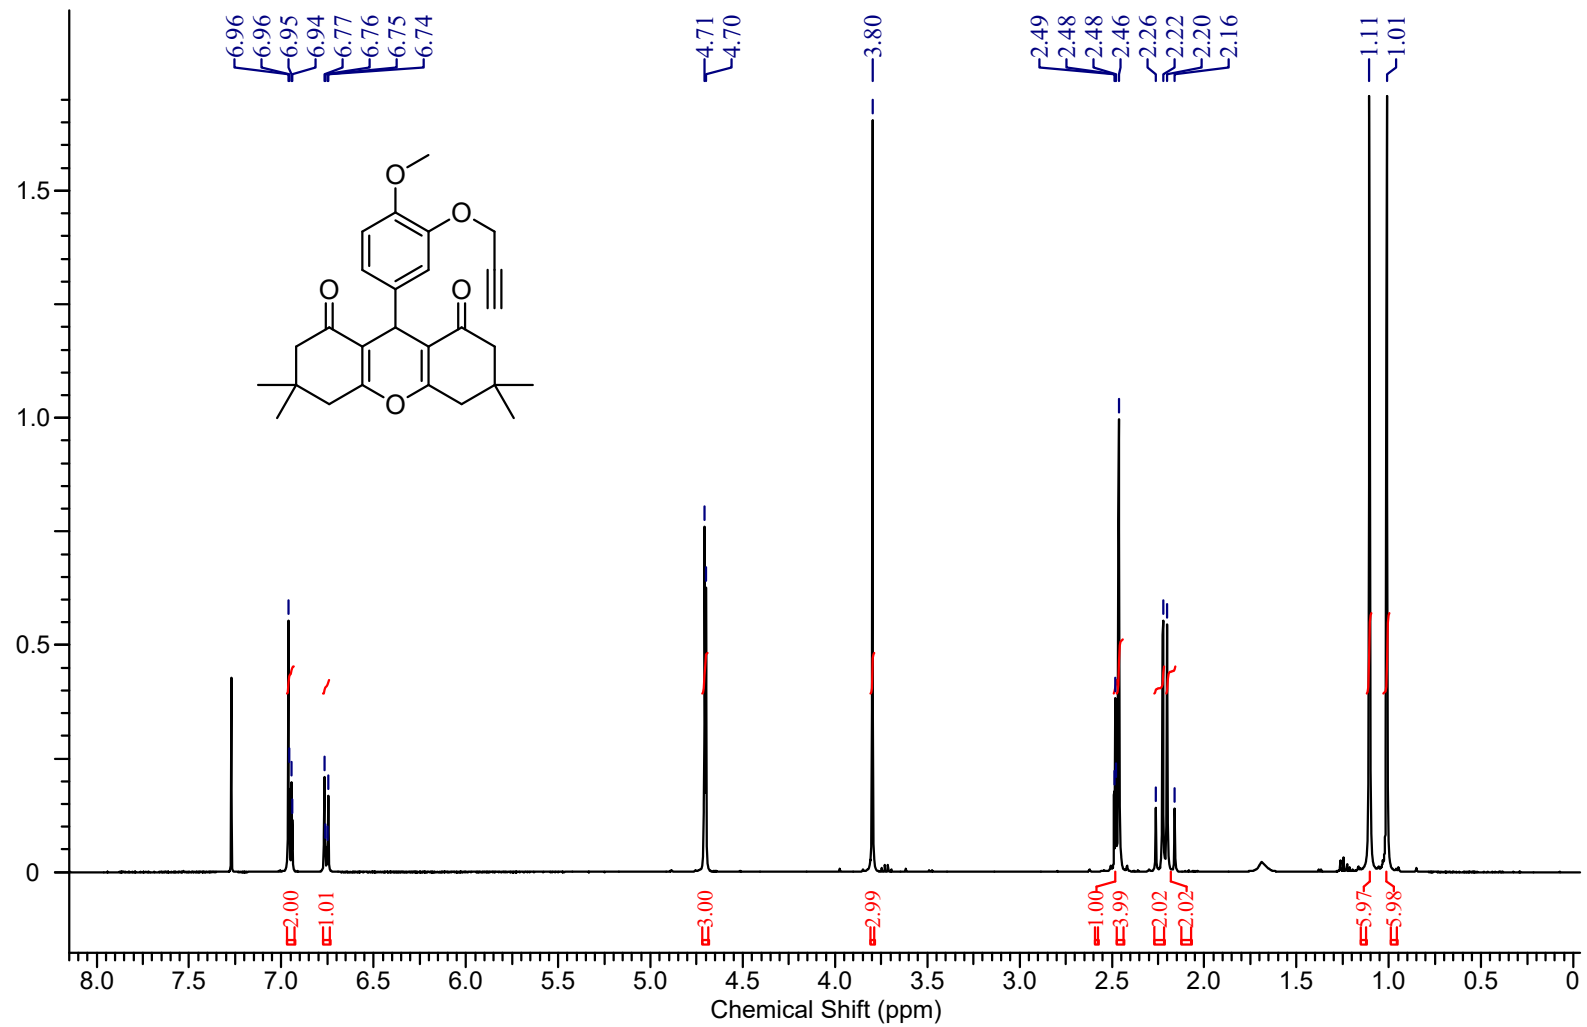

Figure S23: <sup>1</sup>H-NMR (400 MHz, CDCl<sub>3</sub>) of 8d.



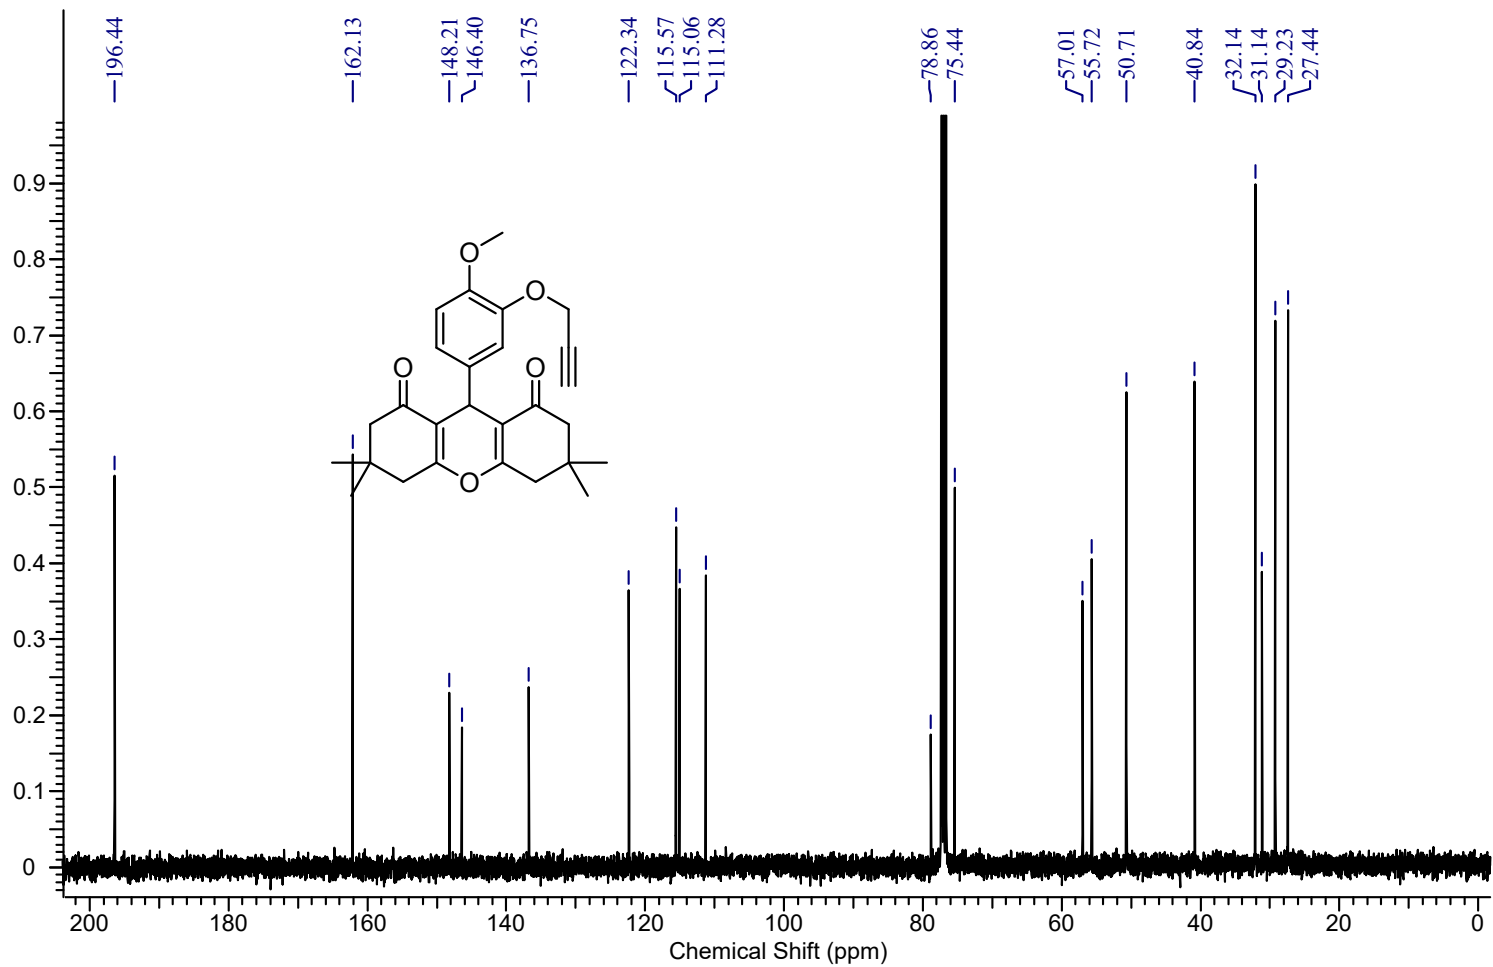

Figure S24:  $^{13}\text{C}$ -NMR (100 MHz,  $\text{CDCl}_3$ ) of 8d.

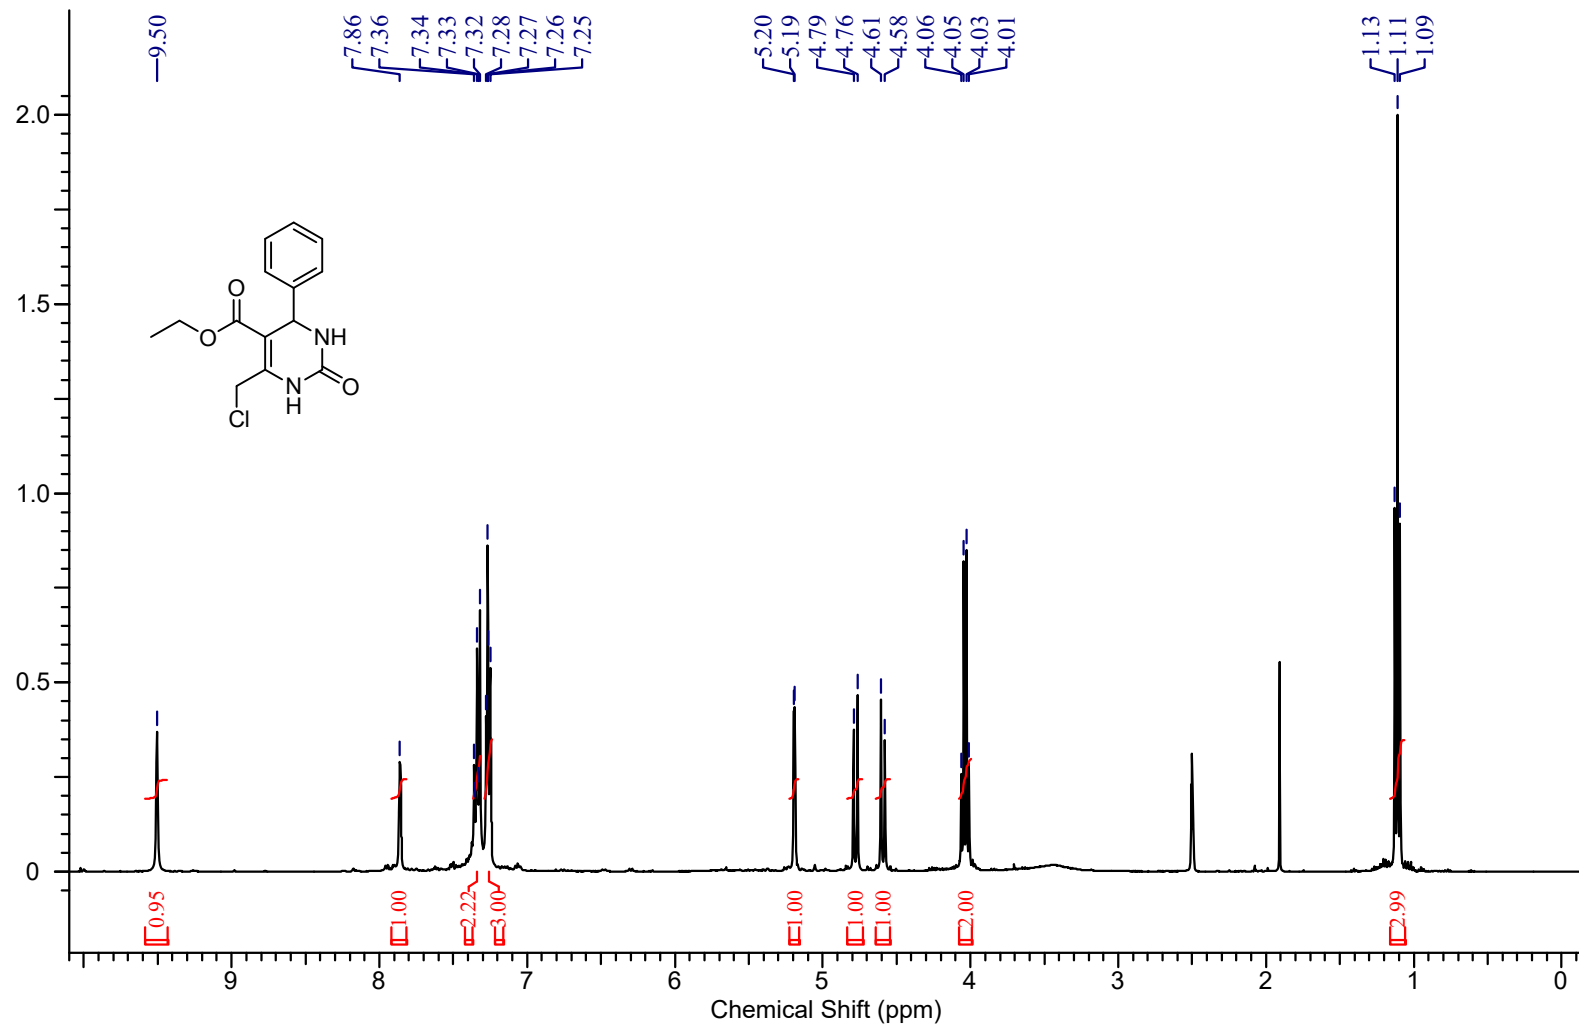

Figure S25: <sup>1</sup>H-NMR (400 MHz, DMSO-d<sub>6</sub>) of 12a.

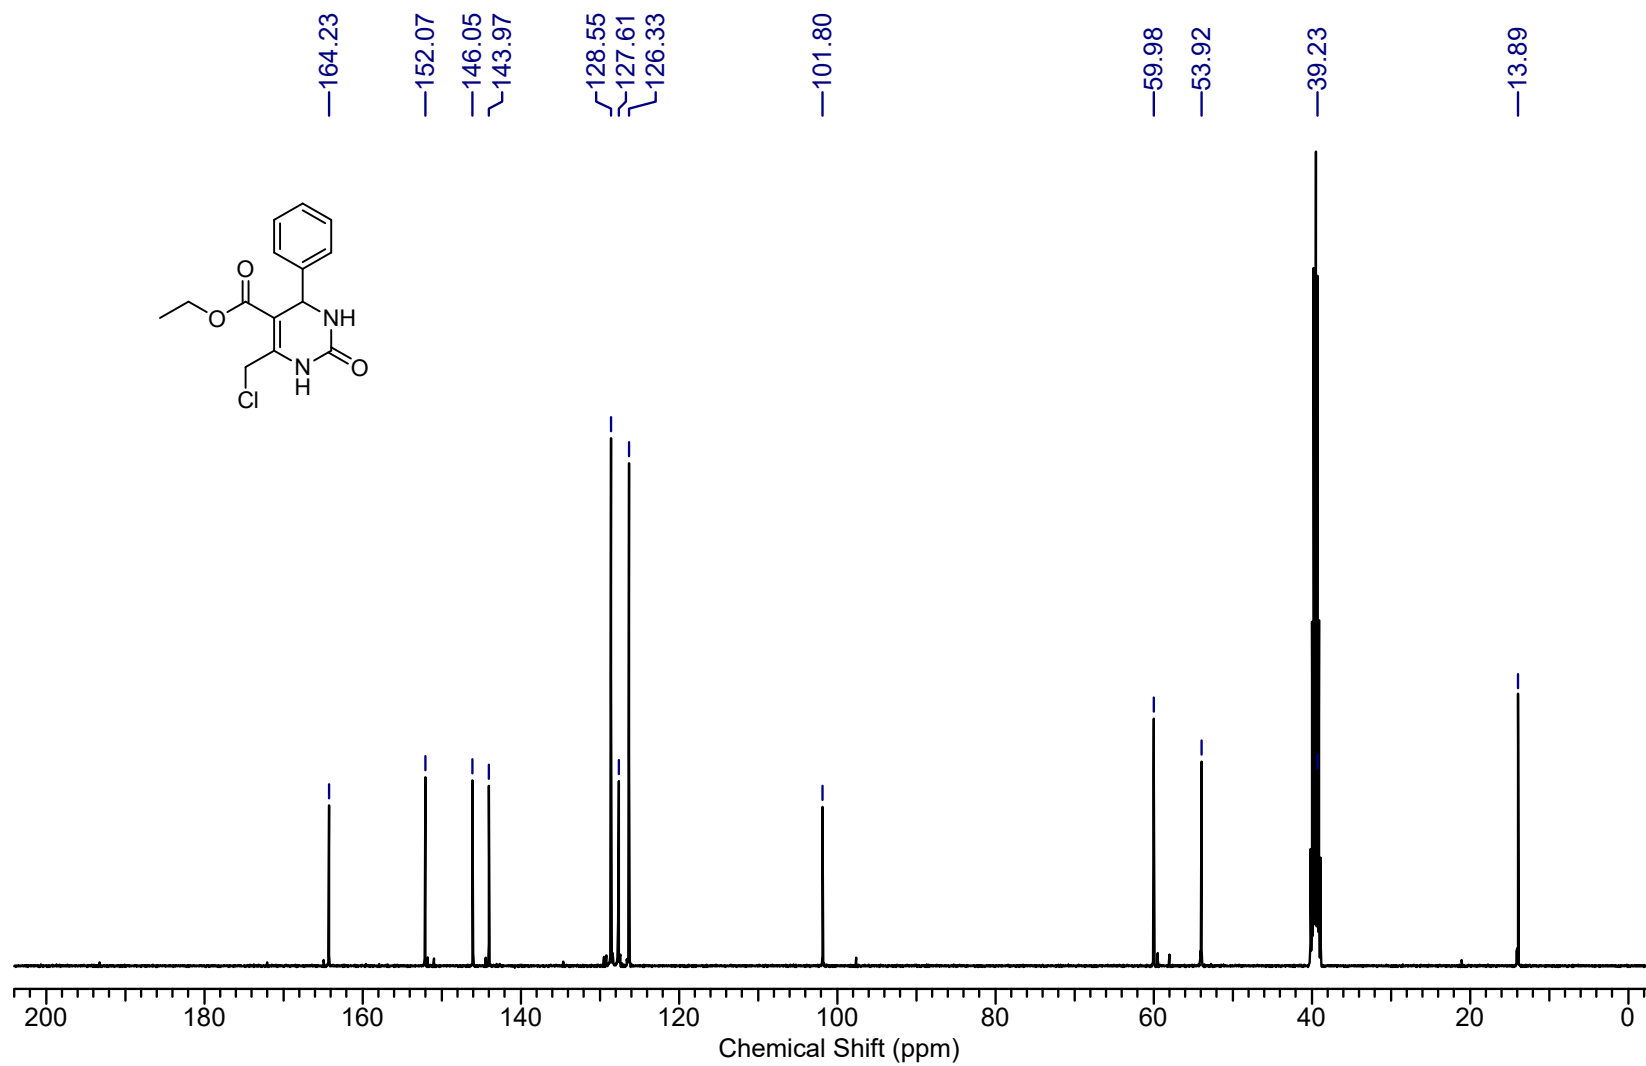

Figure S26:  $^{13}\text{C}$ -NMR (100 MHz,  $\text{DMSO-d}_6$ ) of 12a.

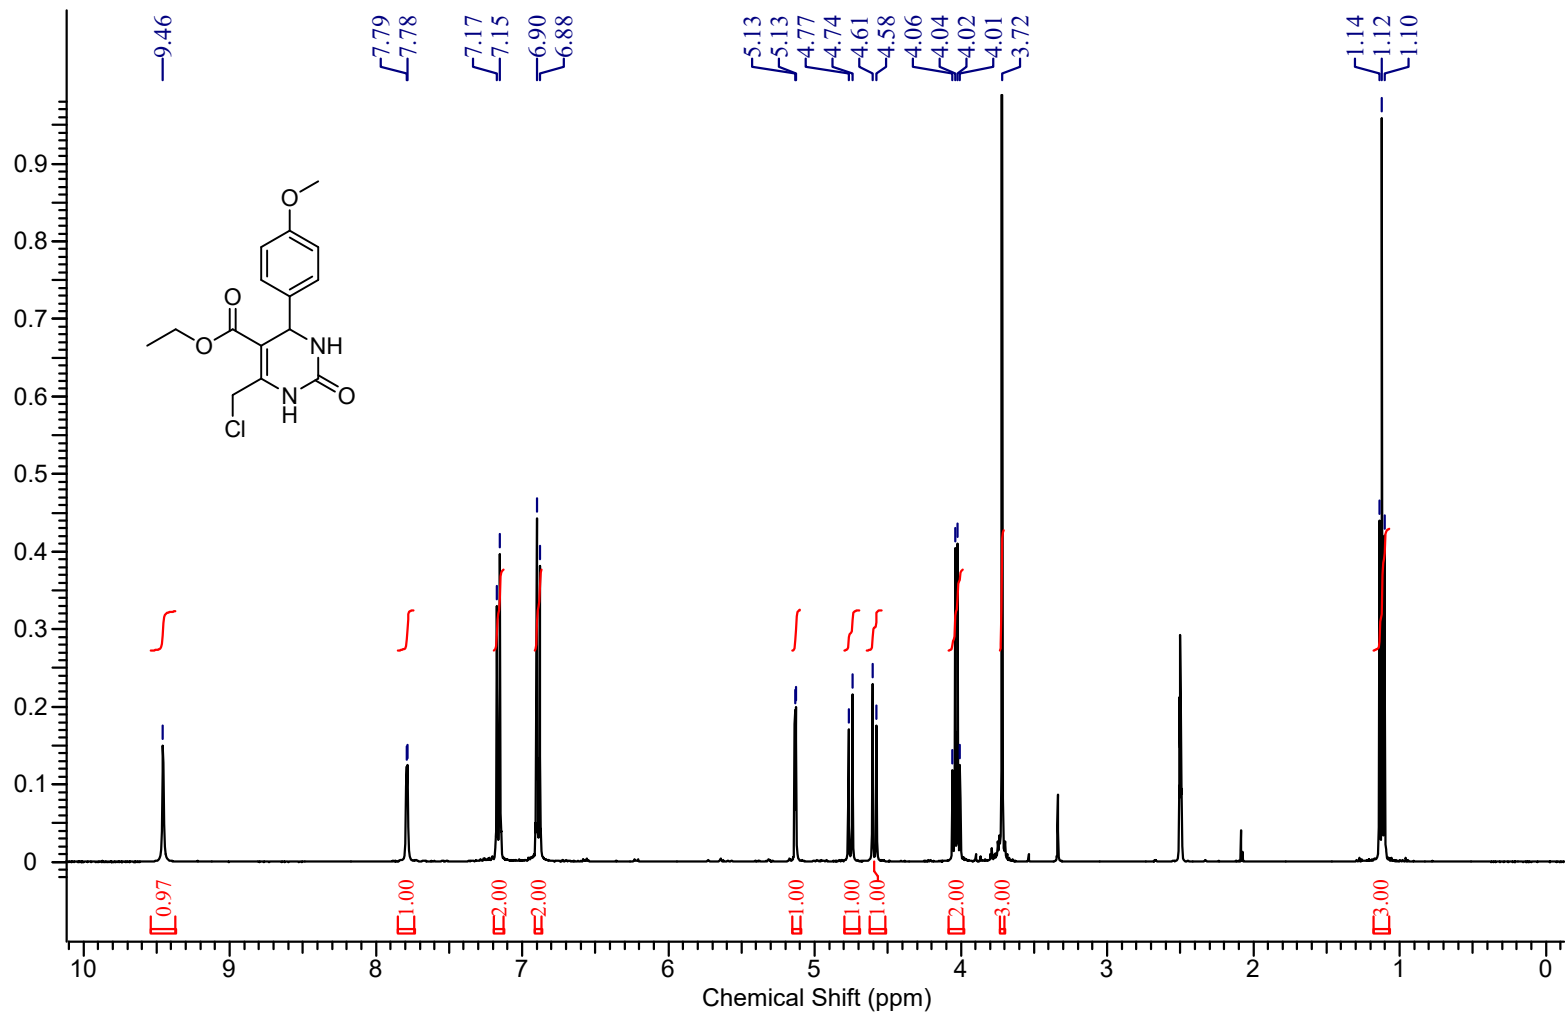

Figure S27:  $^1\text{H-NMR}$  (400 MHz,  $\text{DMSO-d}_6$ ) of 12b.

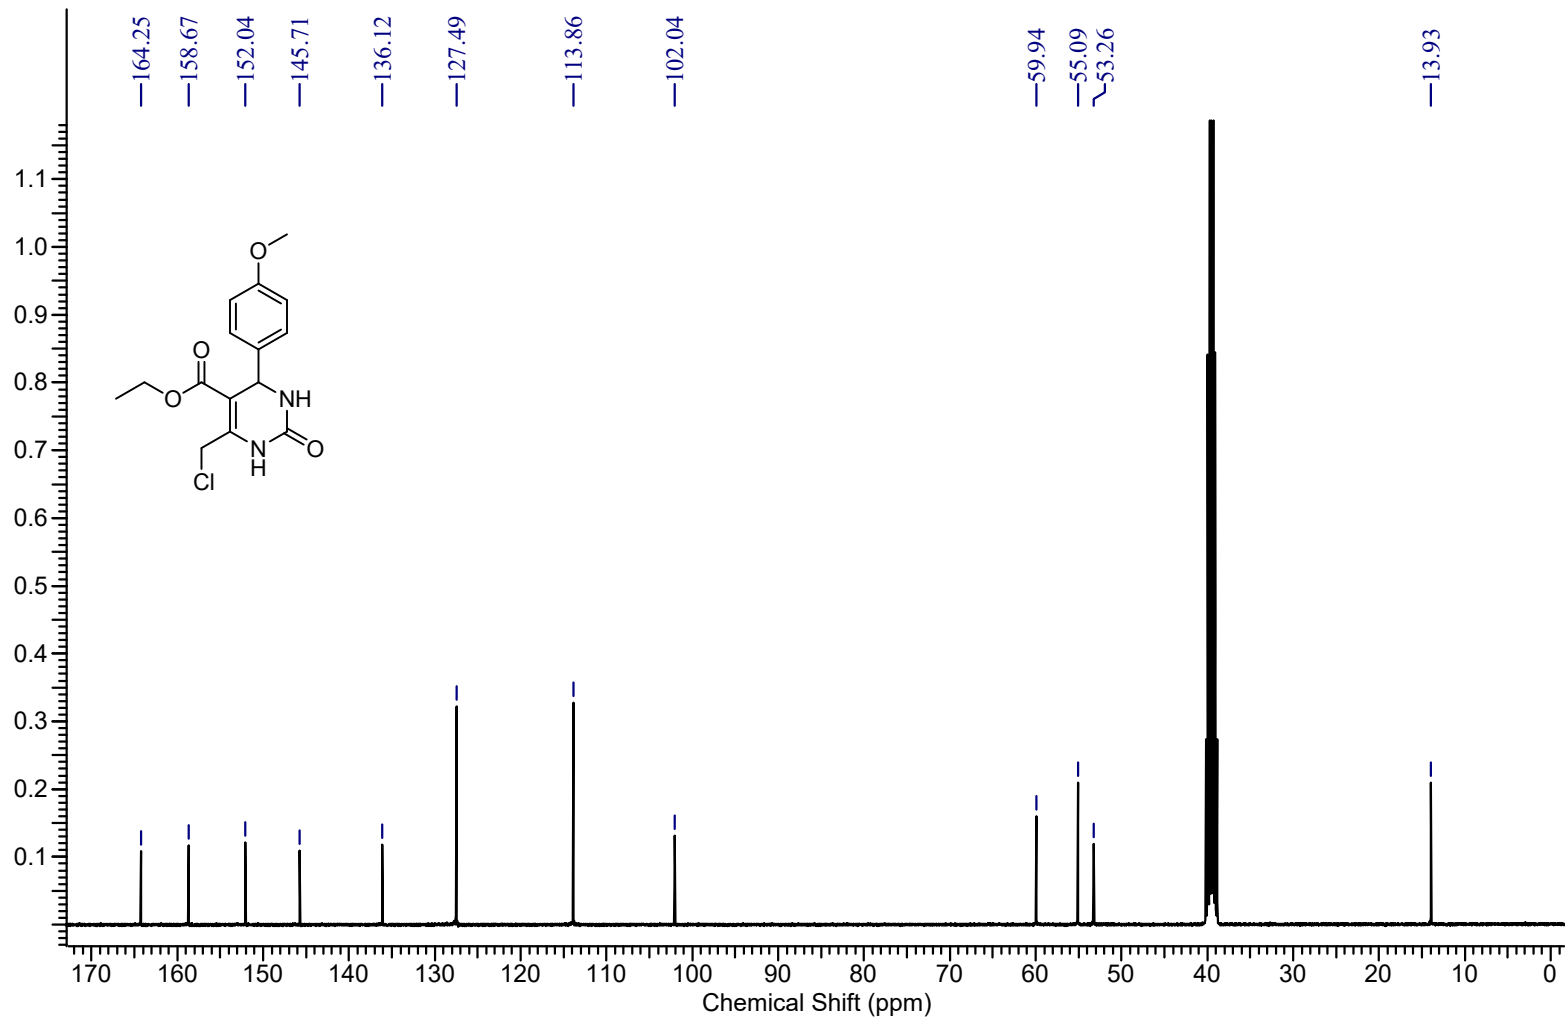

Figure S28:  $^{13}\text{C}$ -NMR (100 MHz,  $\text{DMSO-d}_6$ ) of 12b.

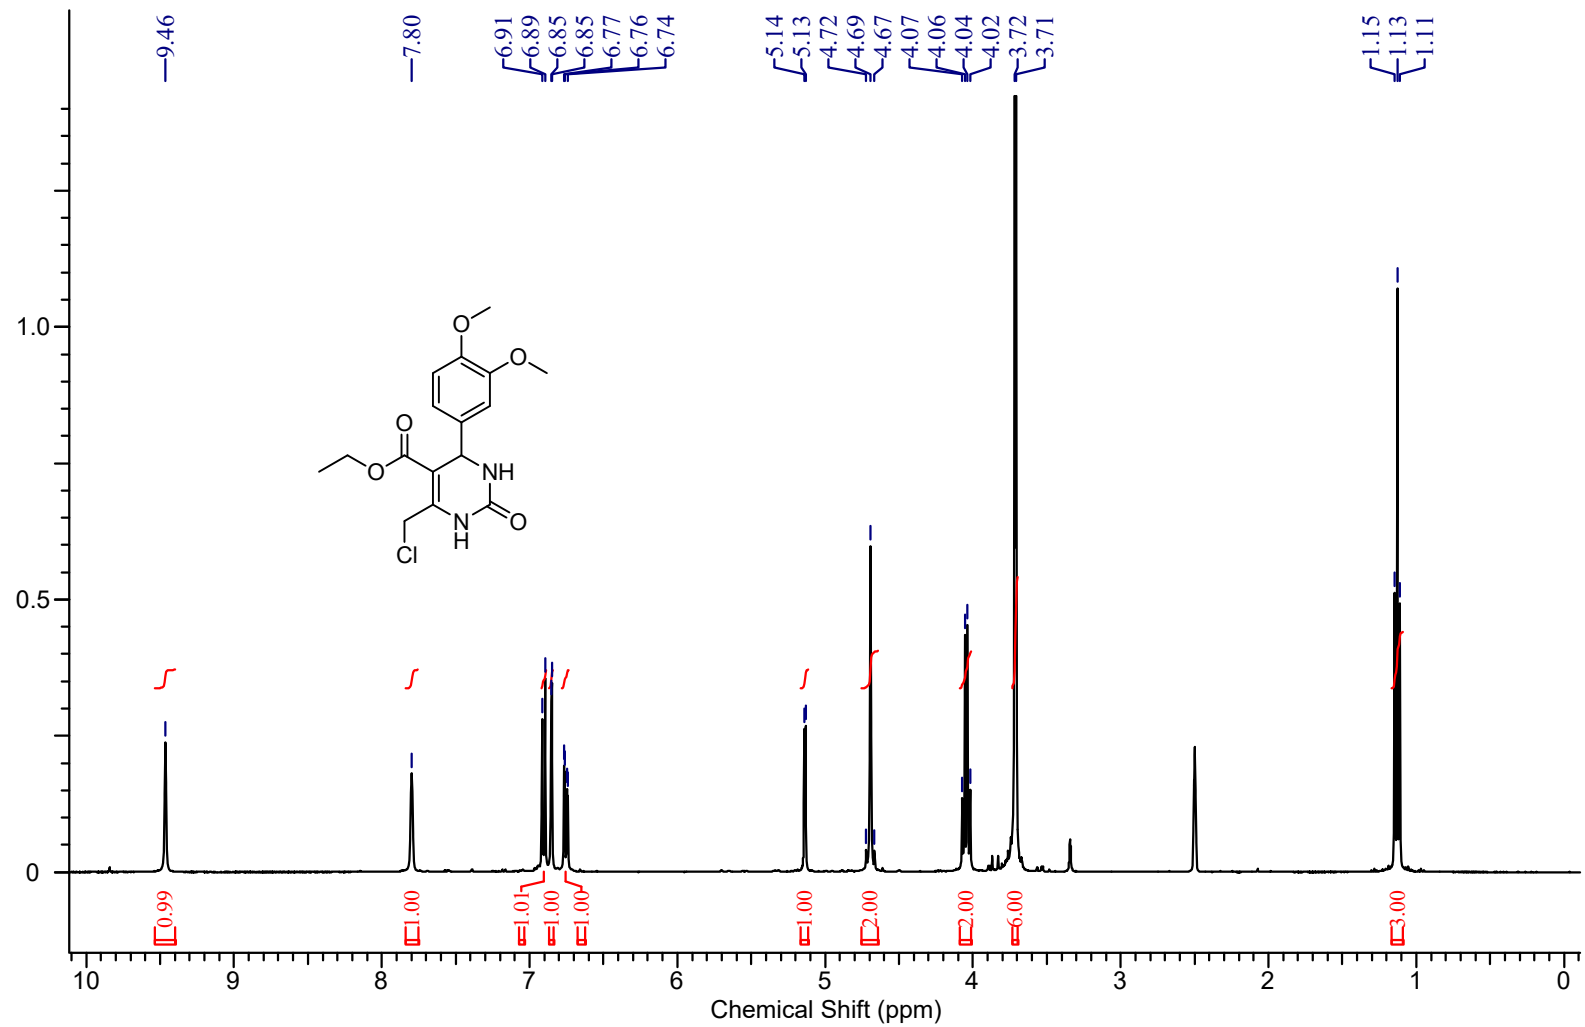

Figure S29: <sup>1</sup>H-NMR (400 MHz, DMSO-d<sub>6</sub>) of 12c.

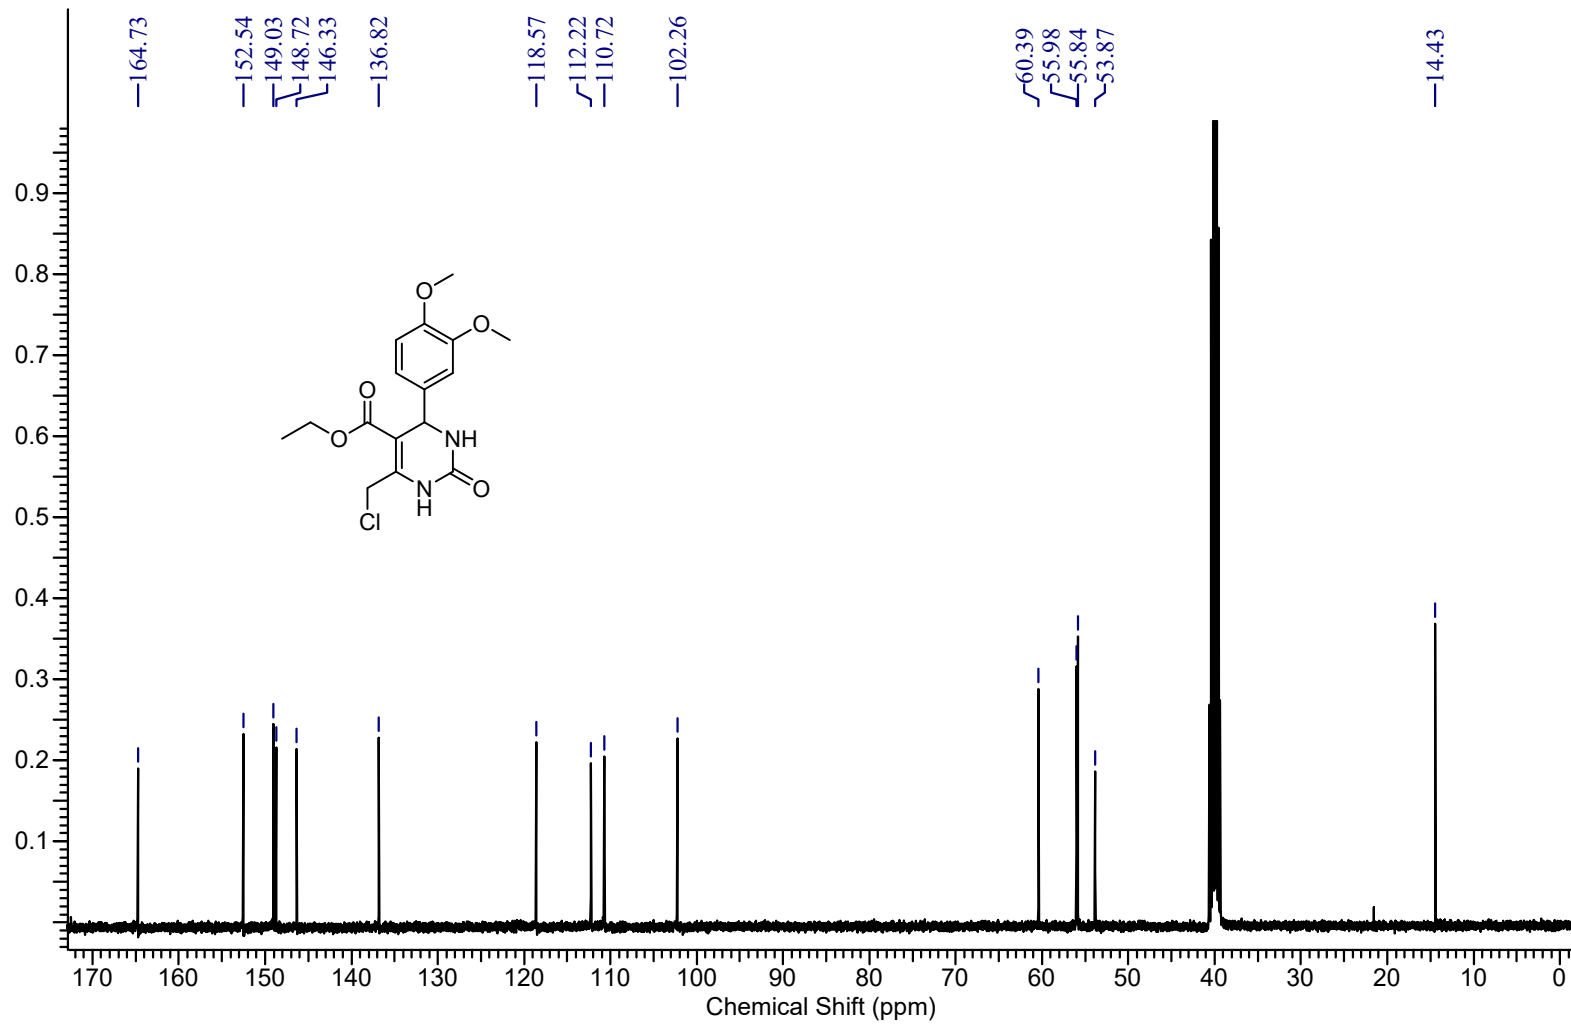

Figure S30:  $^{13}\text{C}$ -NMR (100 MHz,  $\text{DMSO-d}_6$ ) of 12c.

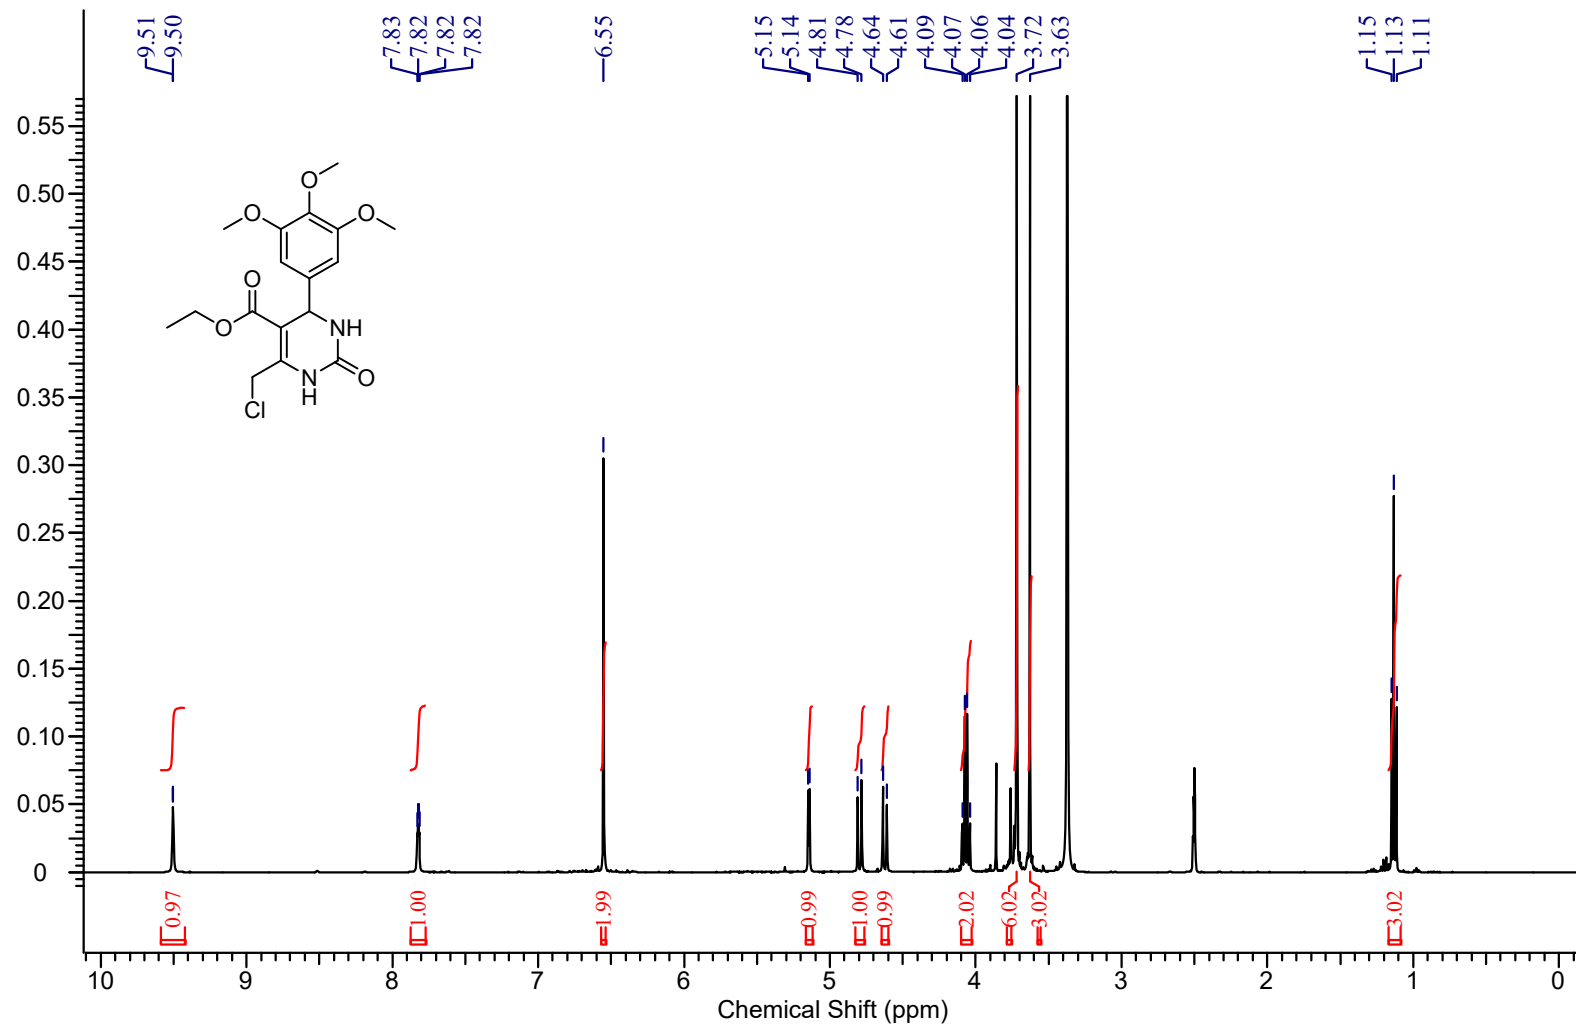

Figure S31: <sup>1</sup>H-NMR (400 MHz, DMSO-d<sub>6</sub>) of 12d.



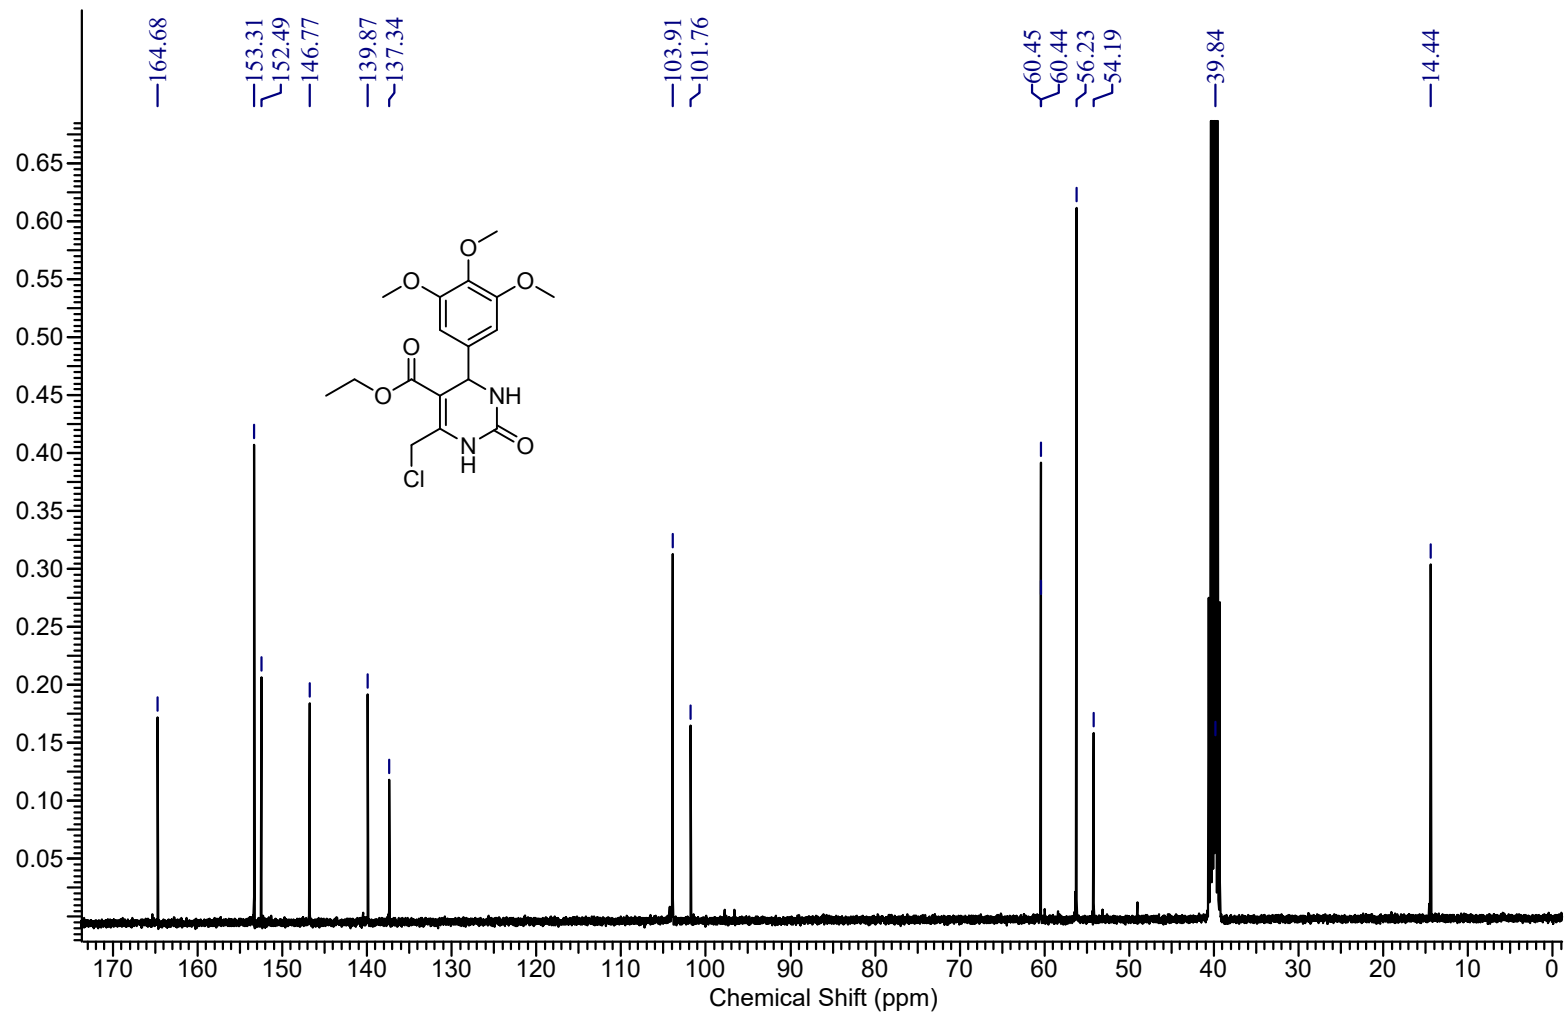

Figure S32:  $^{13}\text{C}$ -NMR (100 MHz,  $\text{DMSO-d}_6$ ) of 12d.

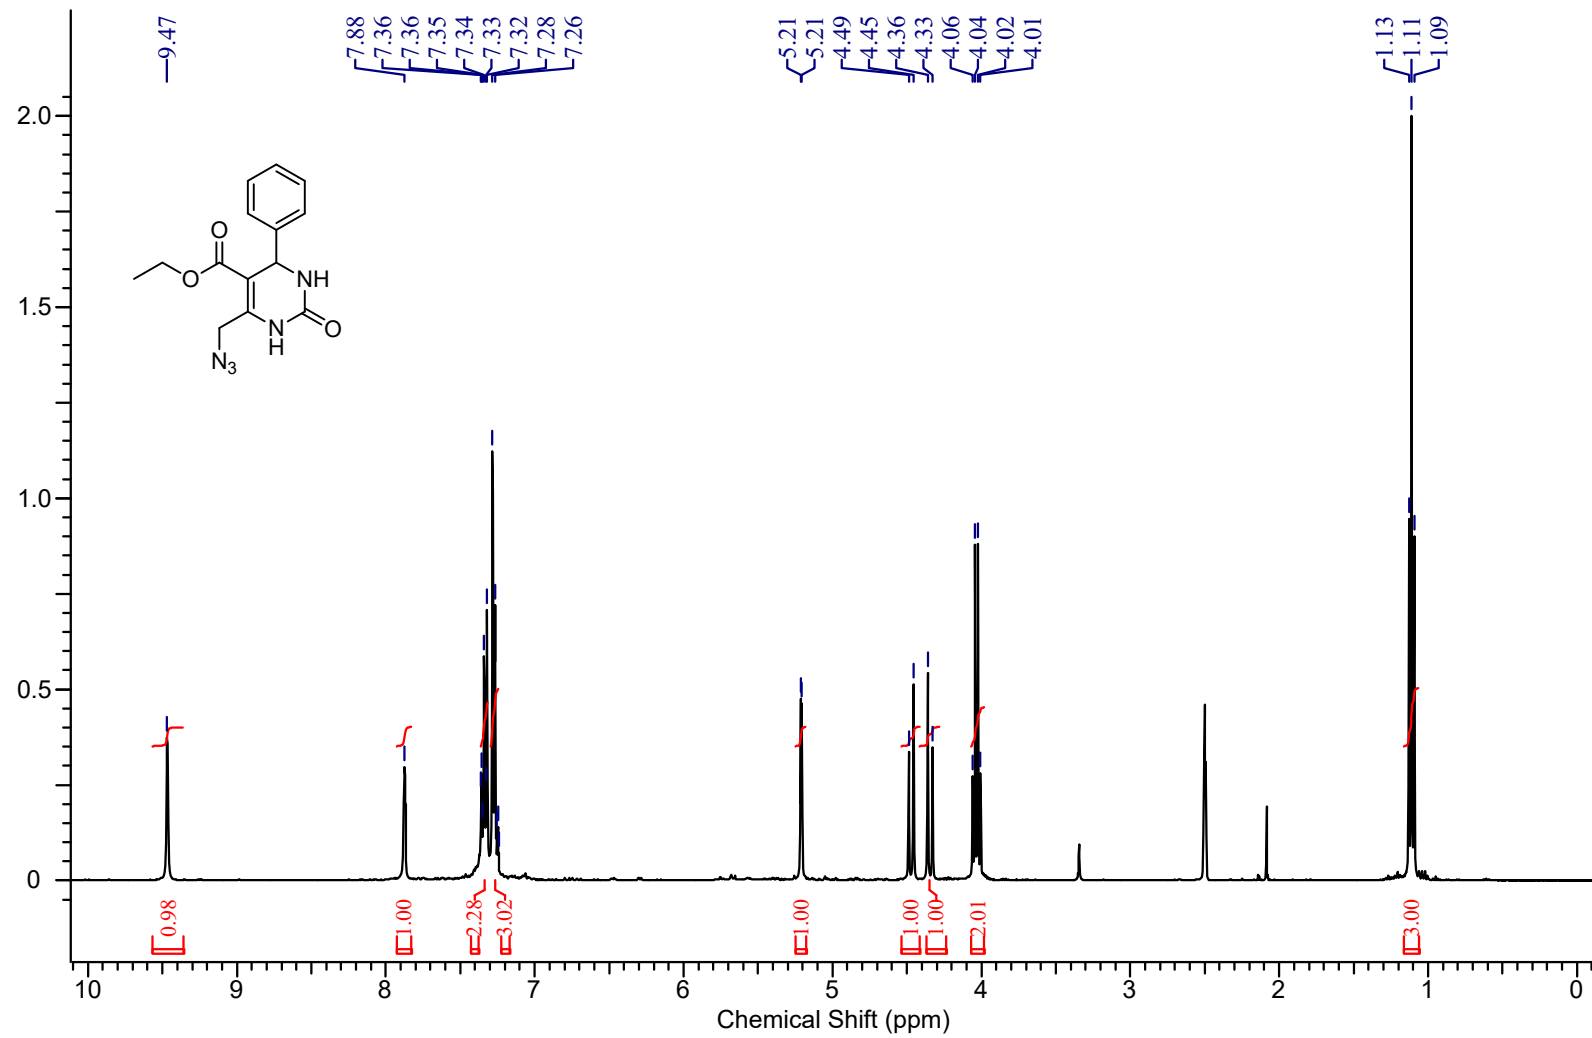

Figure S33: <sup>1</sup>H-NMR (400 MHz, DMSO-d<sub>6</sub>) of 14a.

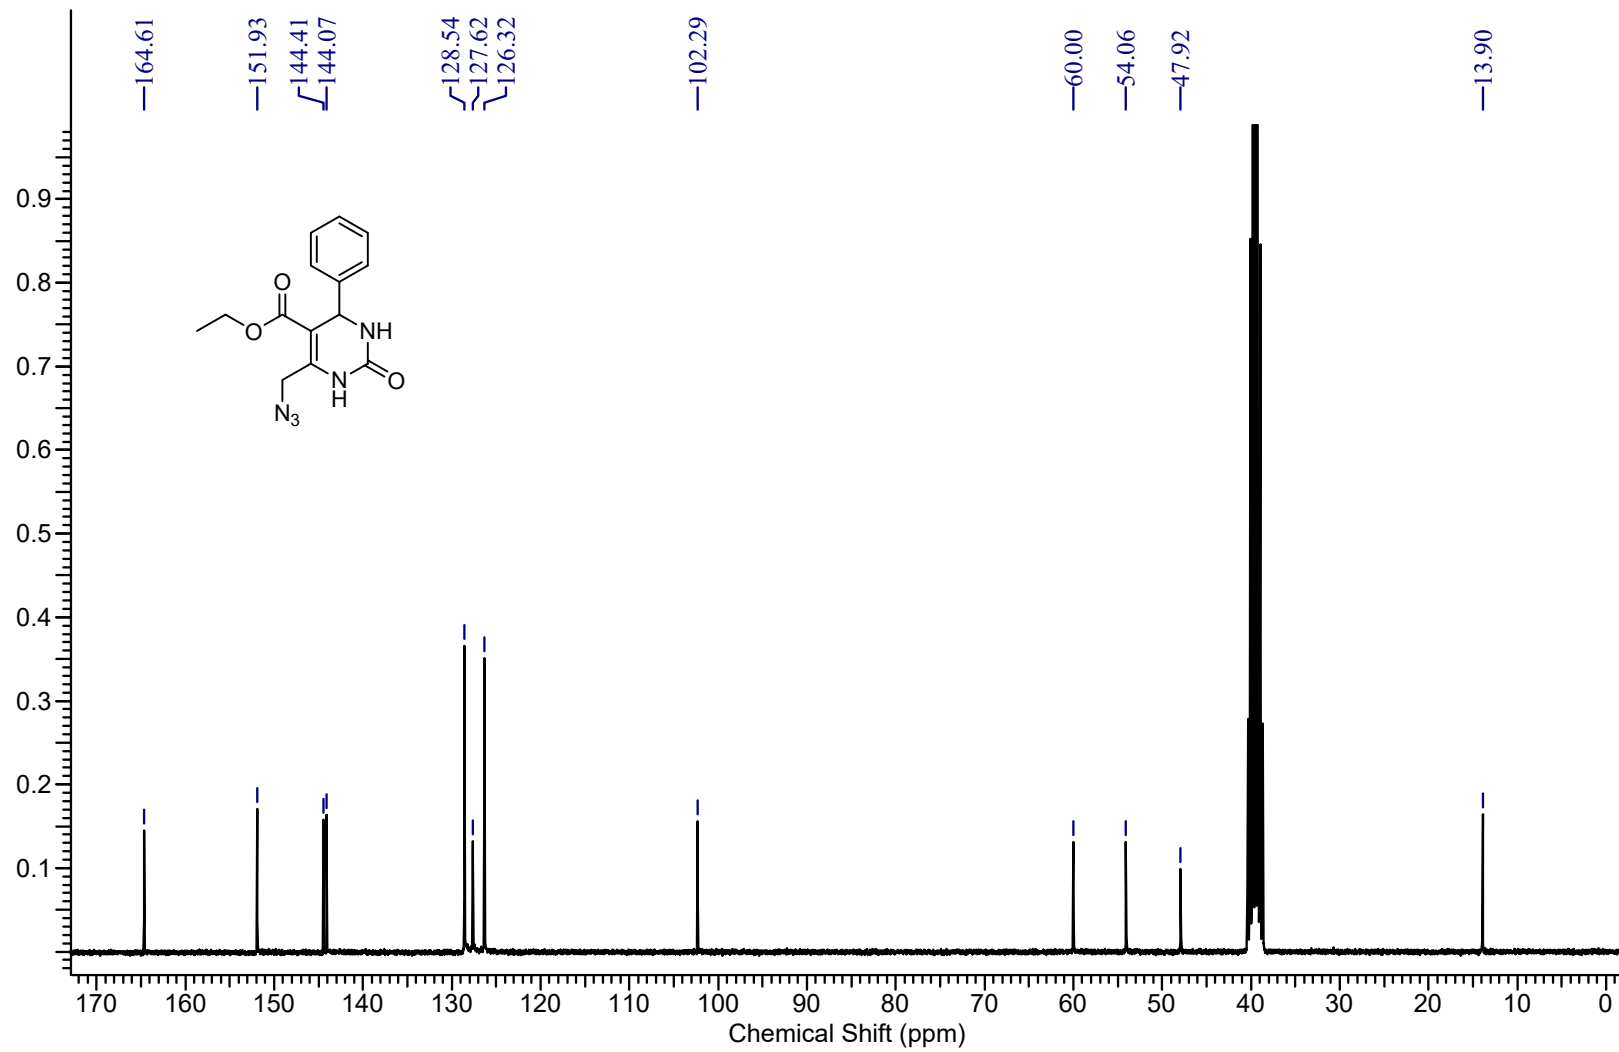

Figure S34:  $^{13}\text{C}$ -NMR (100 MHz,  $\text{DMSO-d}_6$ ) of 14a.

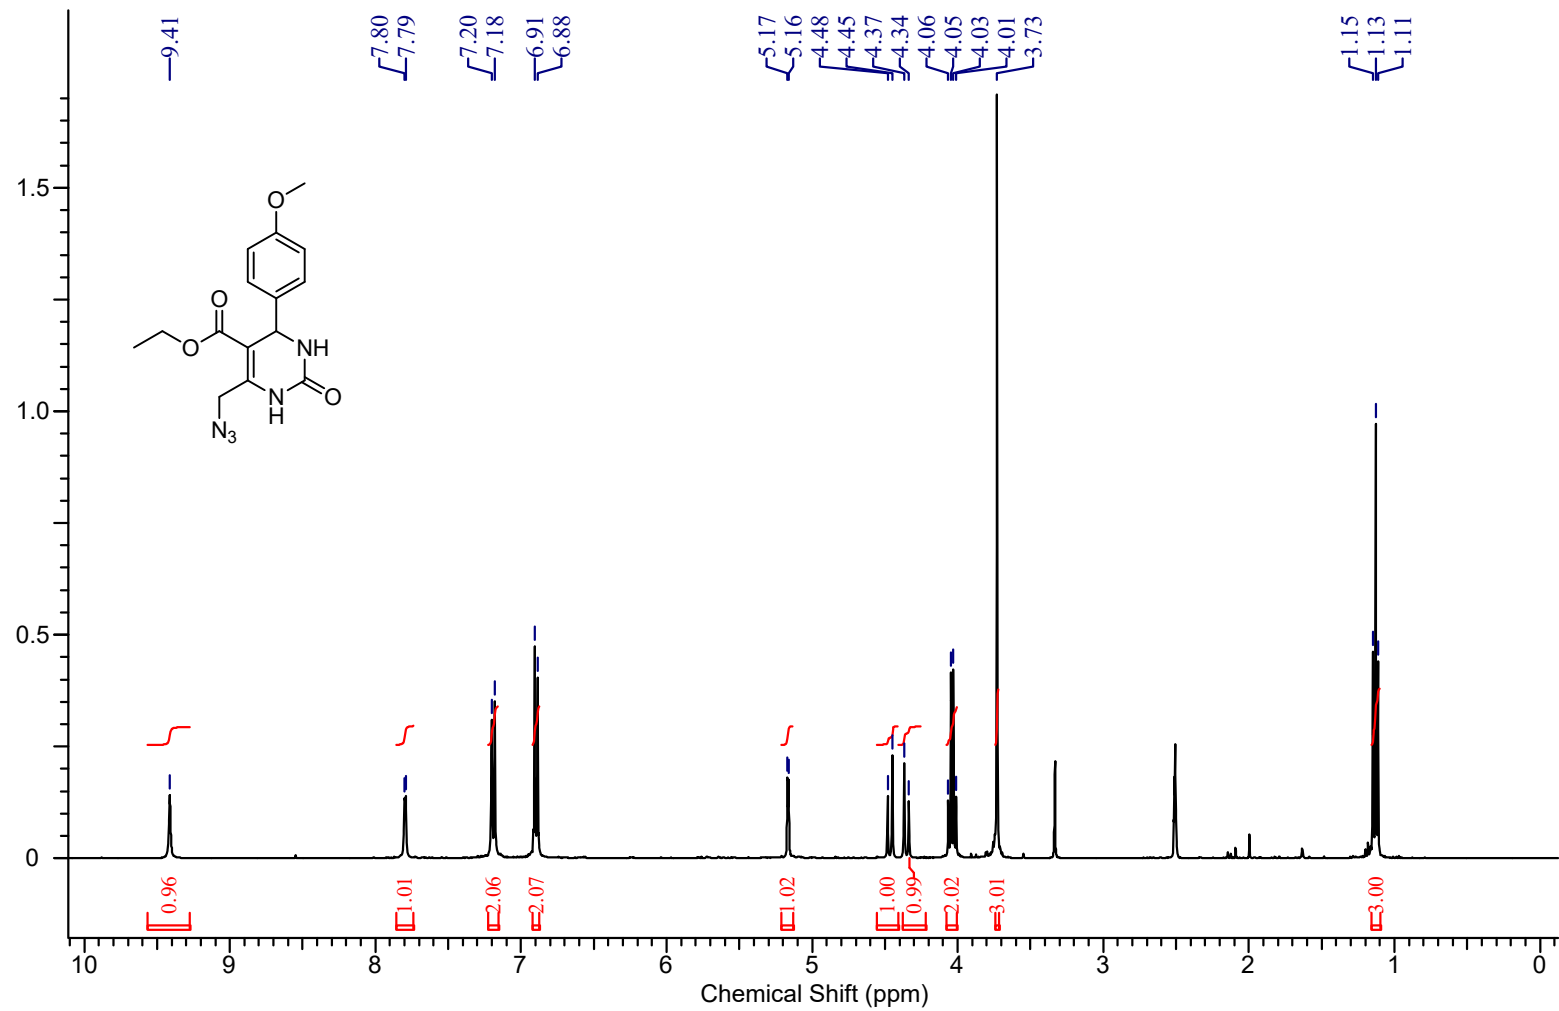

Figure S35:  $^1\text{H-NMR}$  (400 MHz,  $\text{DMSO-d}_6$ ) of 14b.

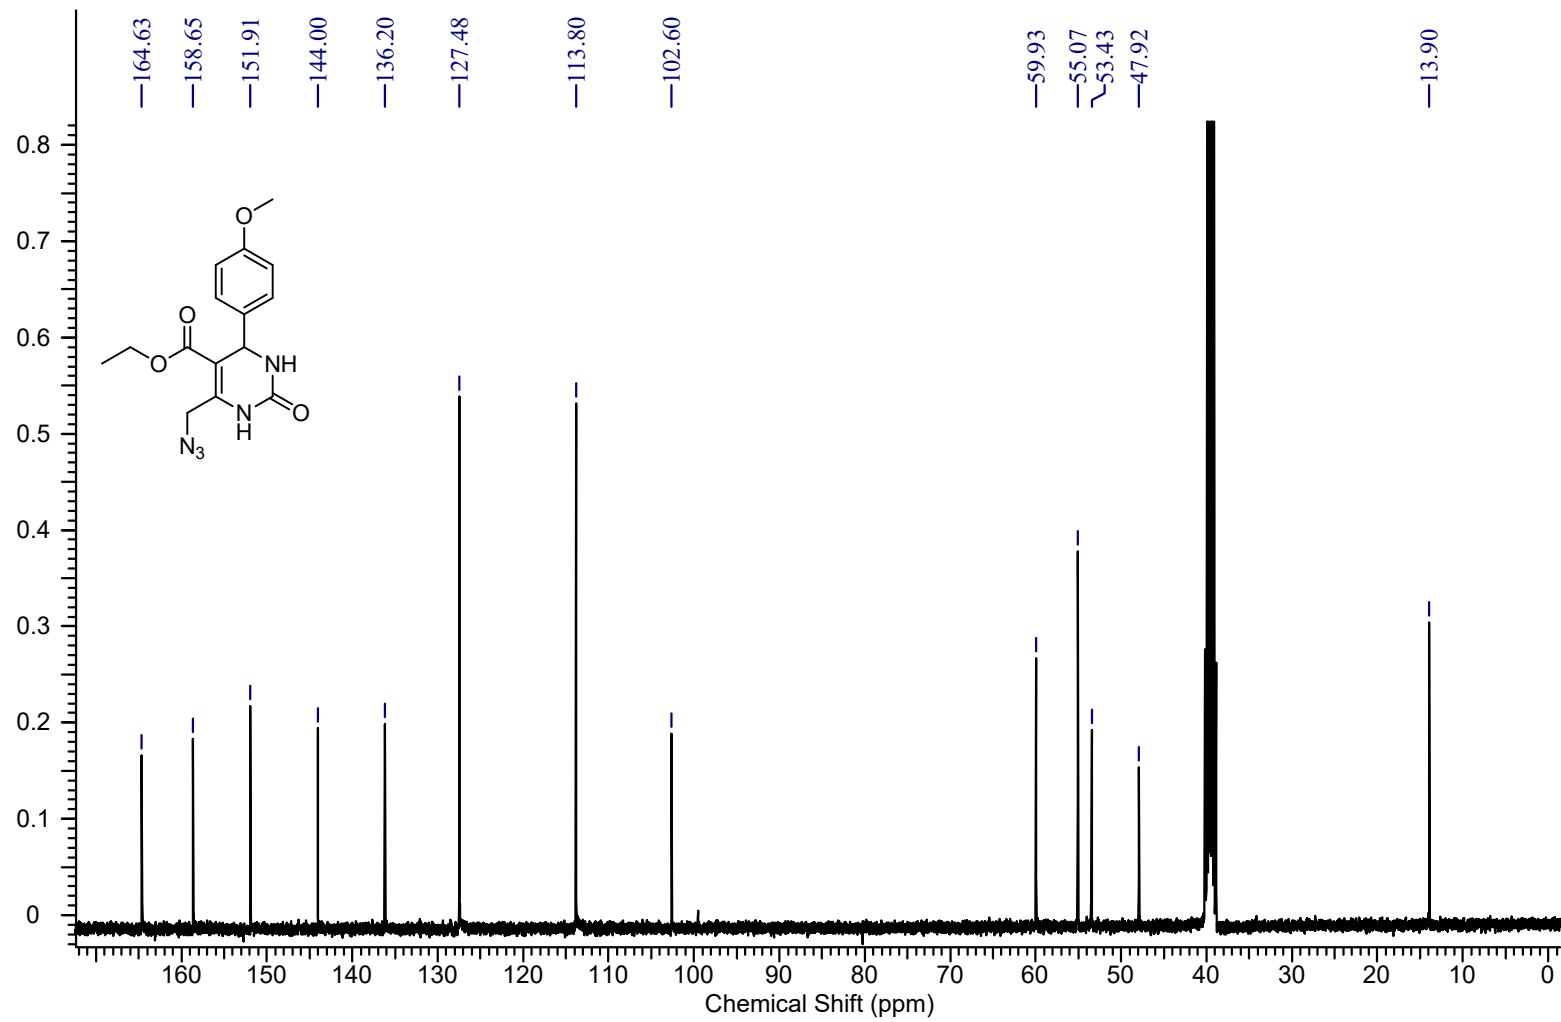

Figure S36:  $^{13}\text{C}$ -NMR (100 MHz,  $\text{DMSO-d}_6$ ) of 14b.

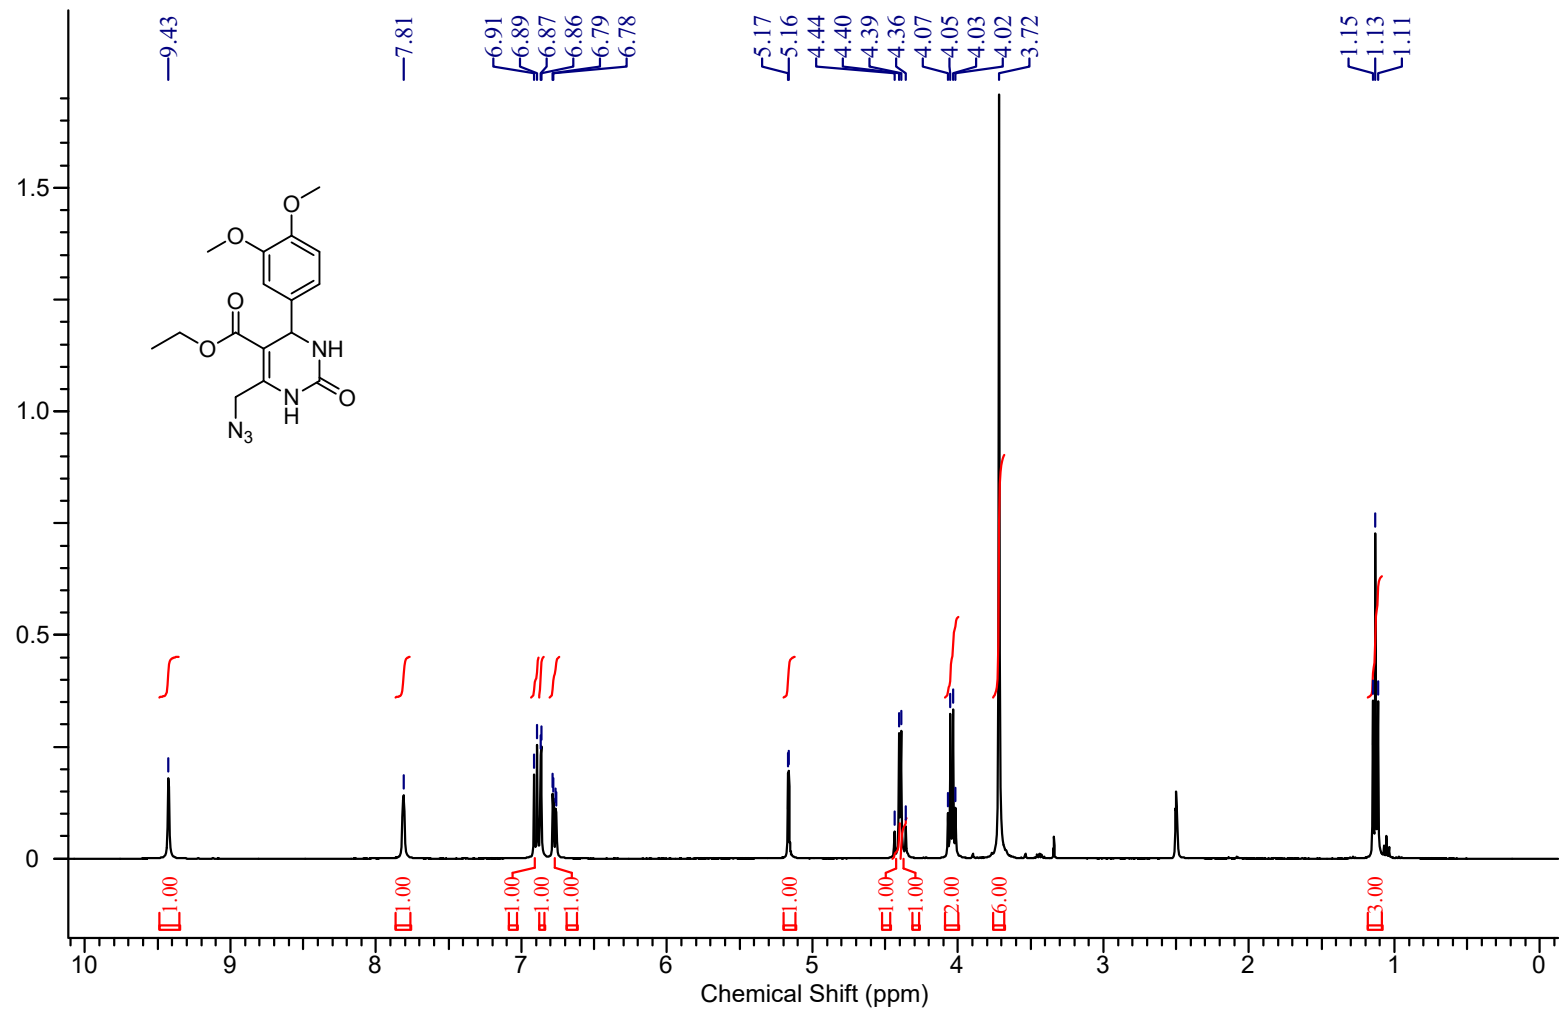

Figure S37:  $^1\text{H-NMR}$  (400 MHz,  $\text{DMSO-d}_6$ ) of 14c.

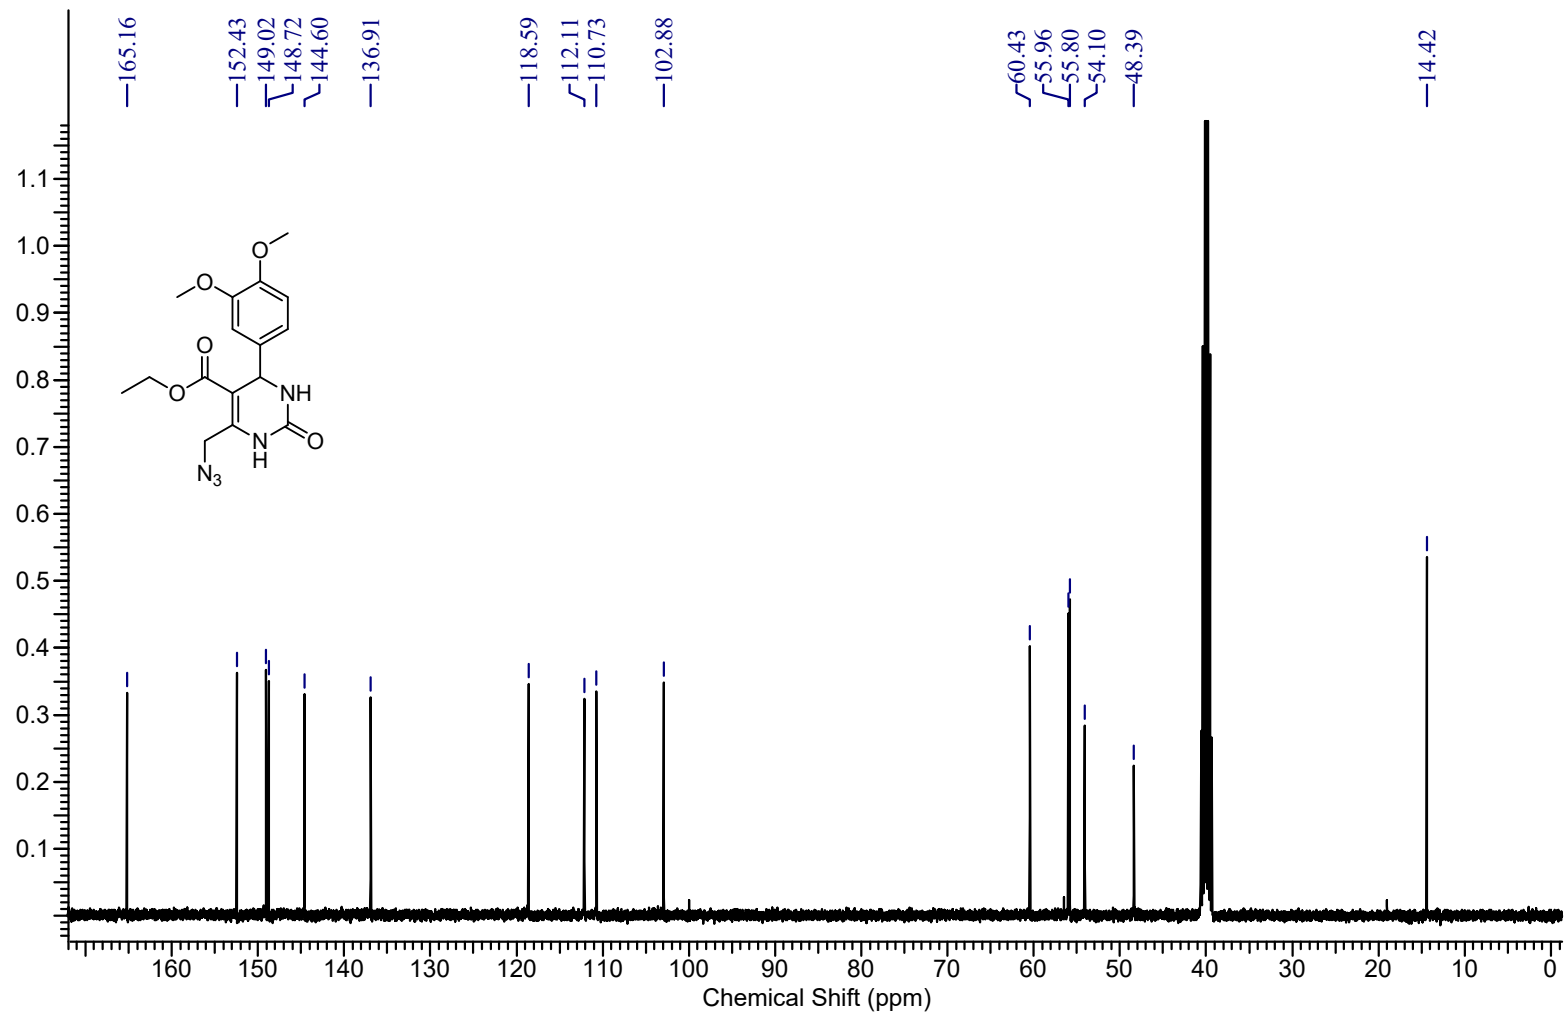

Figure S38:  $^{13}\text{C}$ -NMR (100 MHz,  $\text{DMSO-d}_6$ ) of 14c.

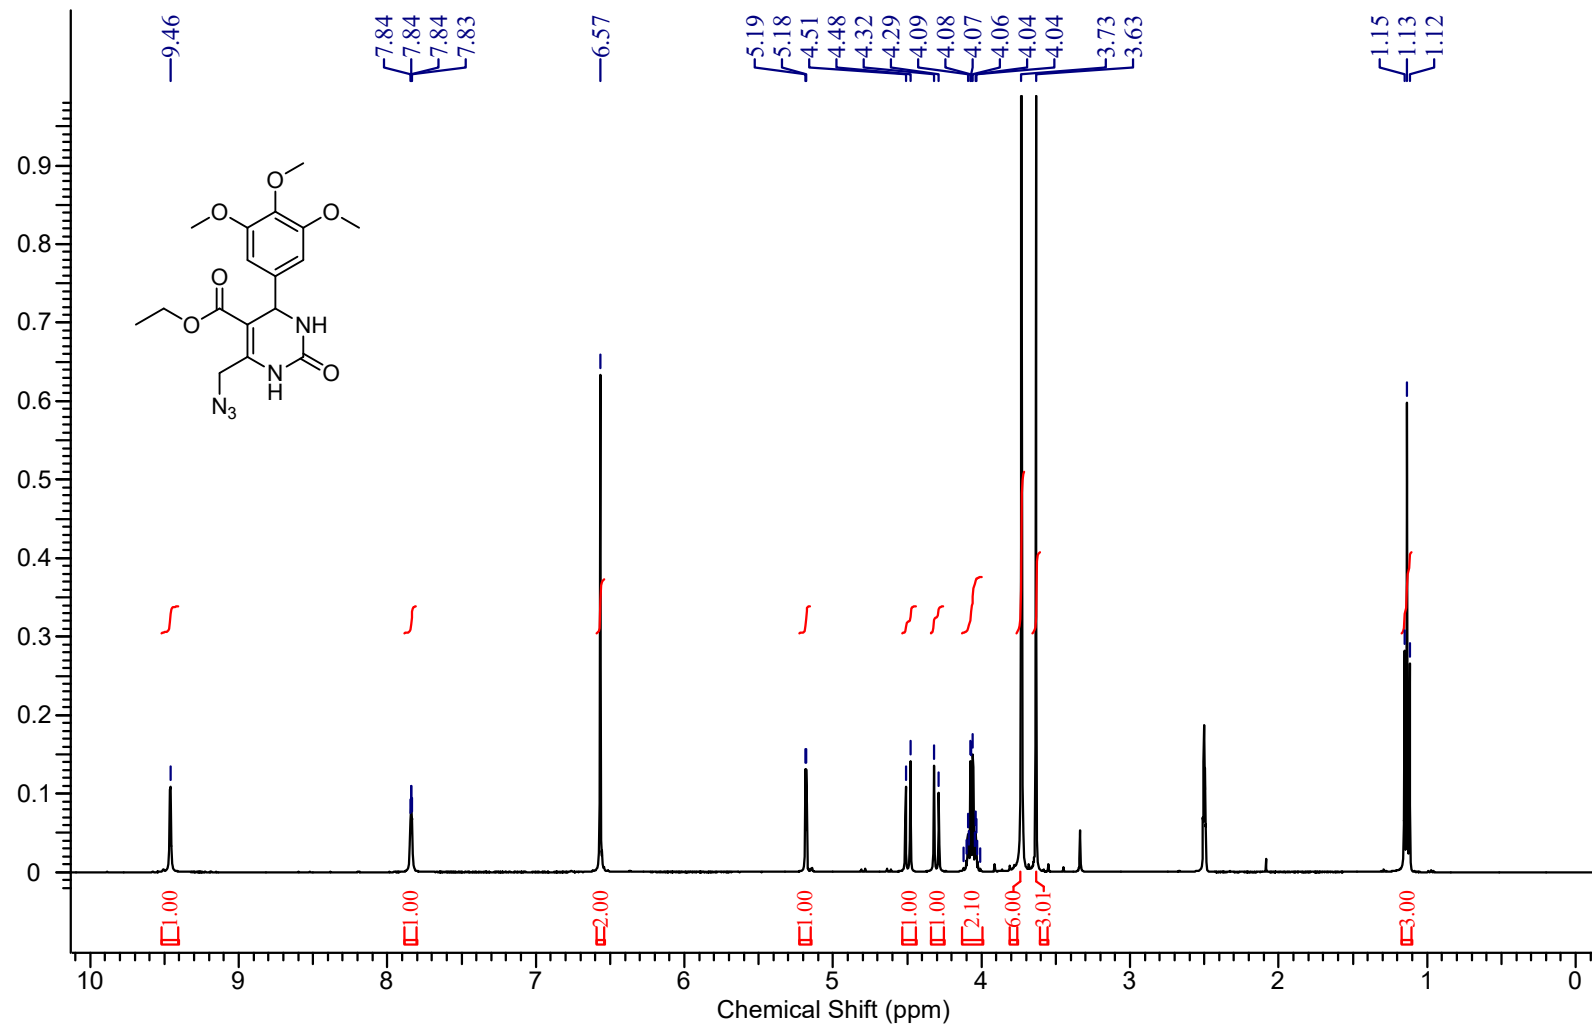

Figure S39: <sup>1</sup>H-NMR (400 MHz, DMSO-d<sub>6</sub>) of 14d.



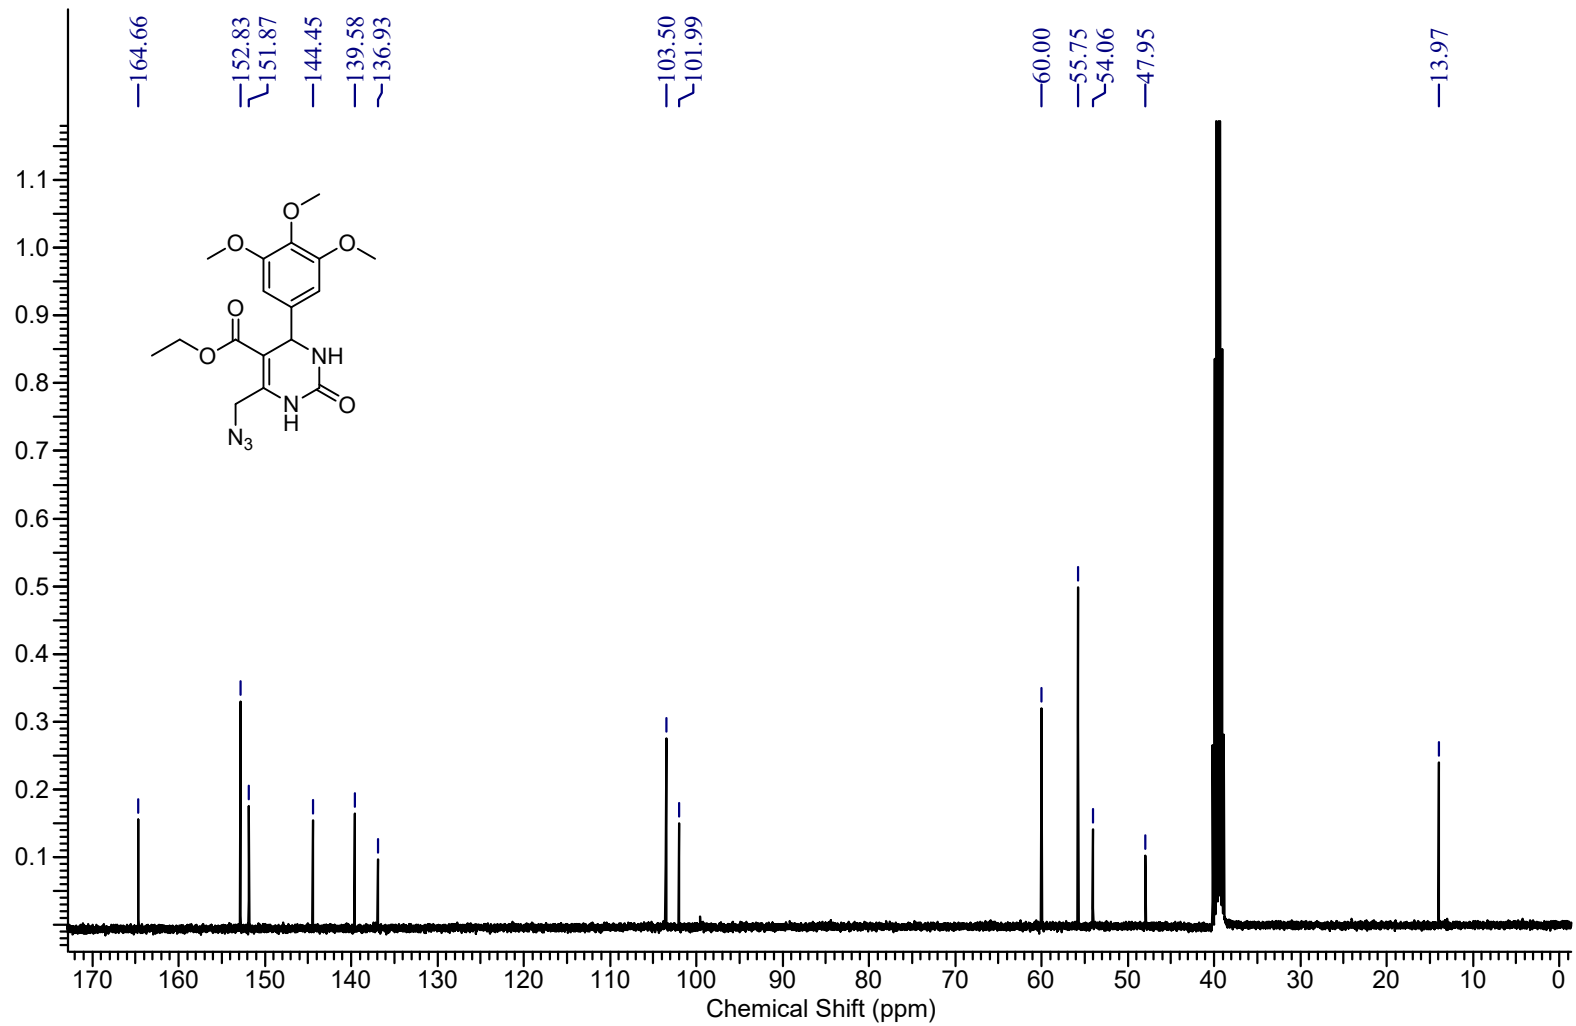

Figure S40:  $^{13}\text{C}$ -NMR (100 MHz,  $\text{DMSO-d}_6$ ) of 14d.

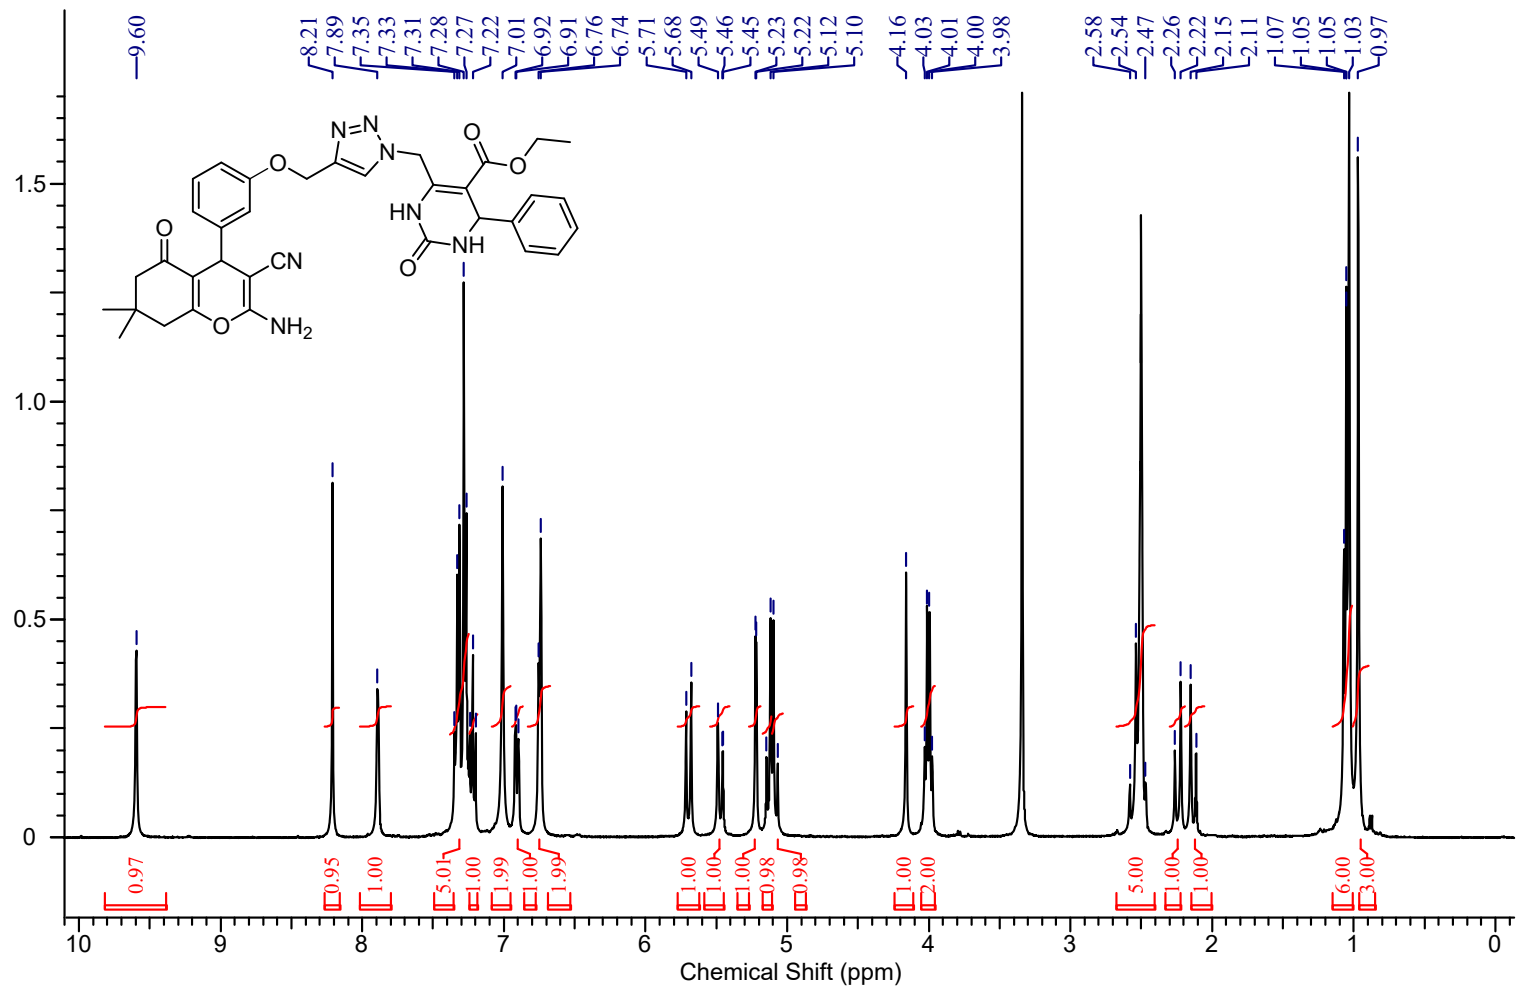

Figure S41:  $^1\text{H-NMR}$  (400 MHz,  $\text{DMSO-d}_6$ ) of 15a.

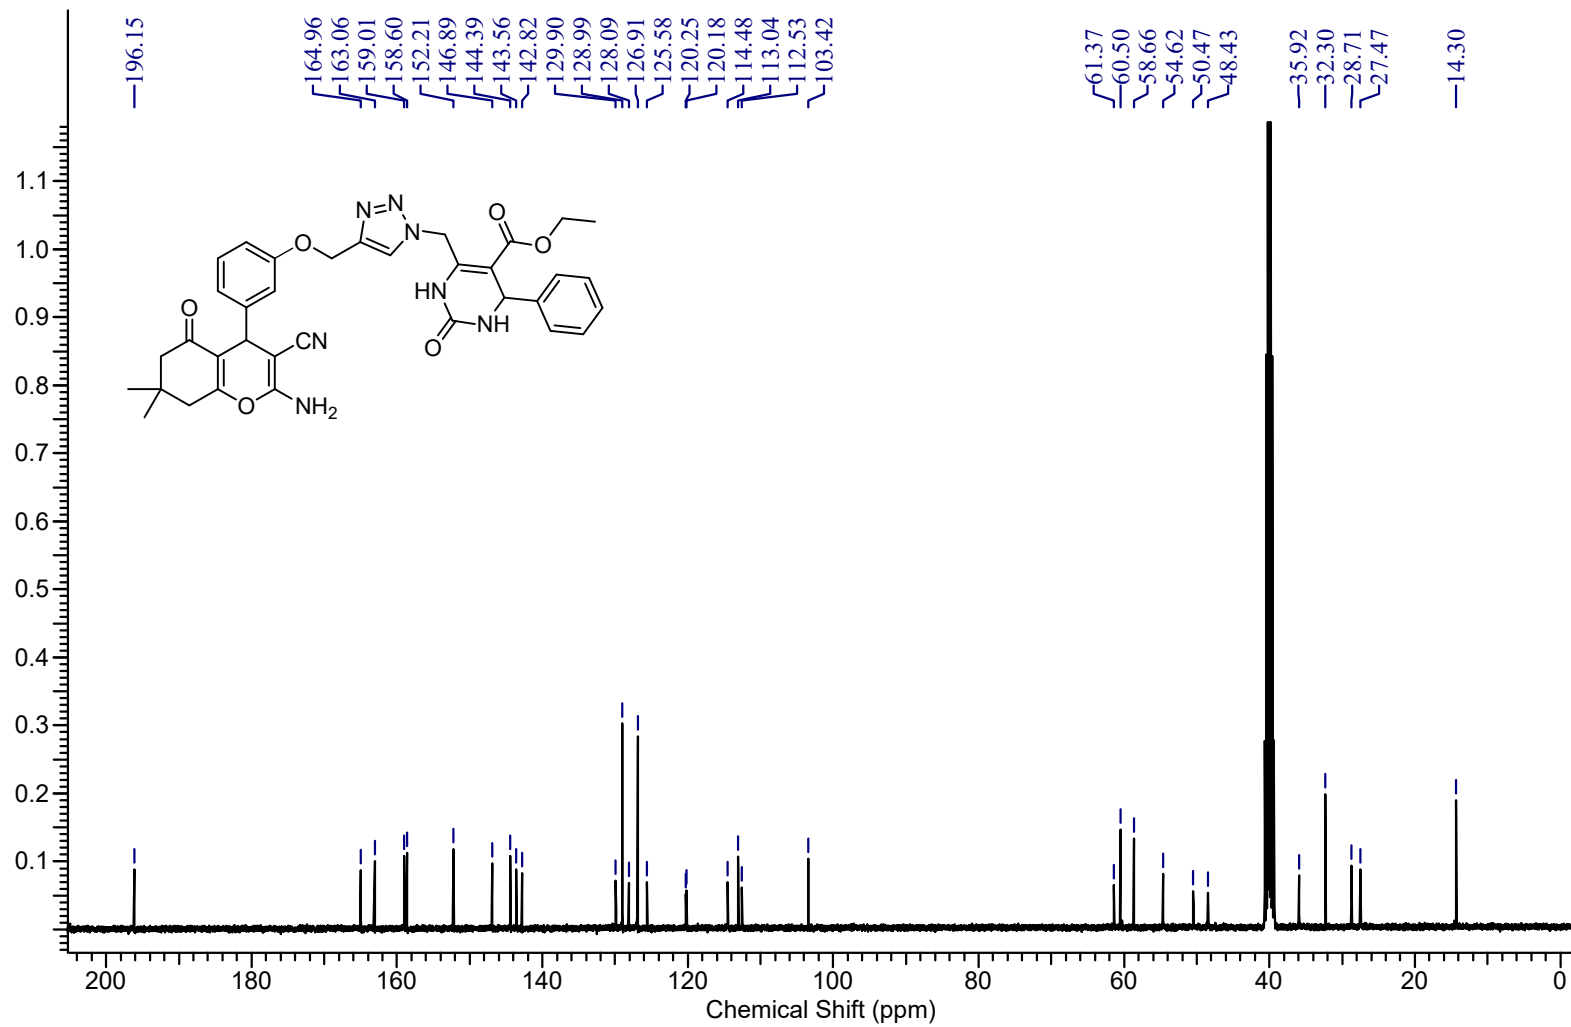

Figure S42:  $^{13}\text{C}$ -NMR (100 MHz,  $\text{DMSO-d}_6$ ) of 15a.

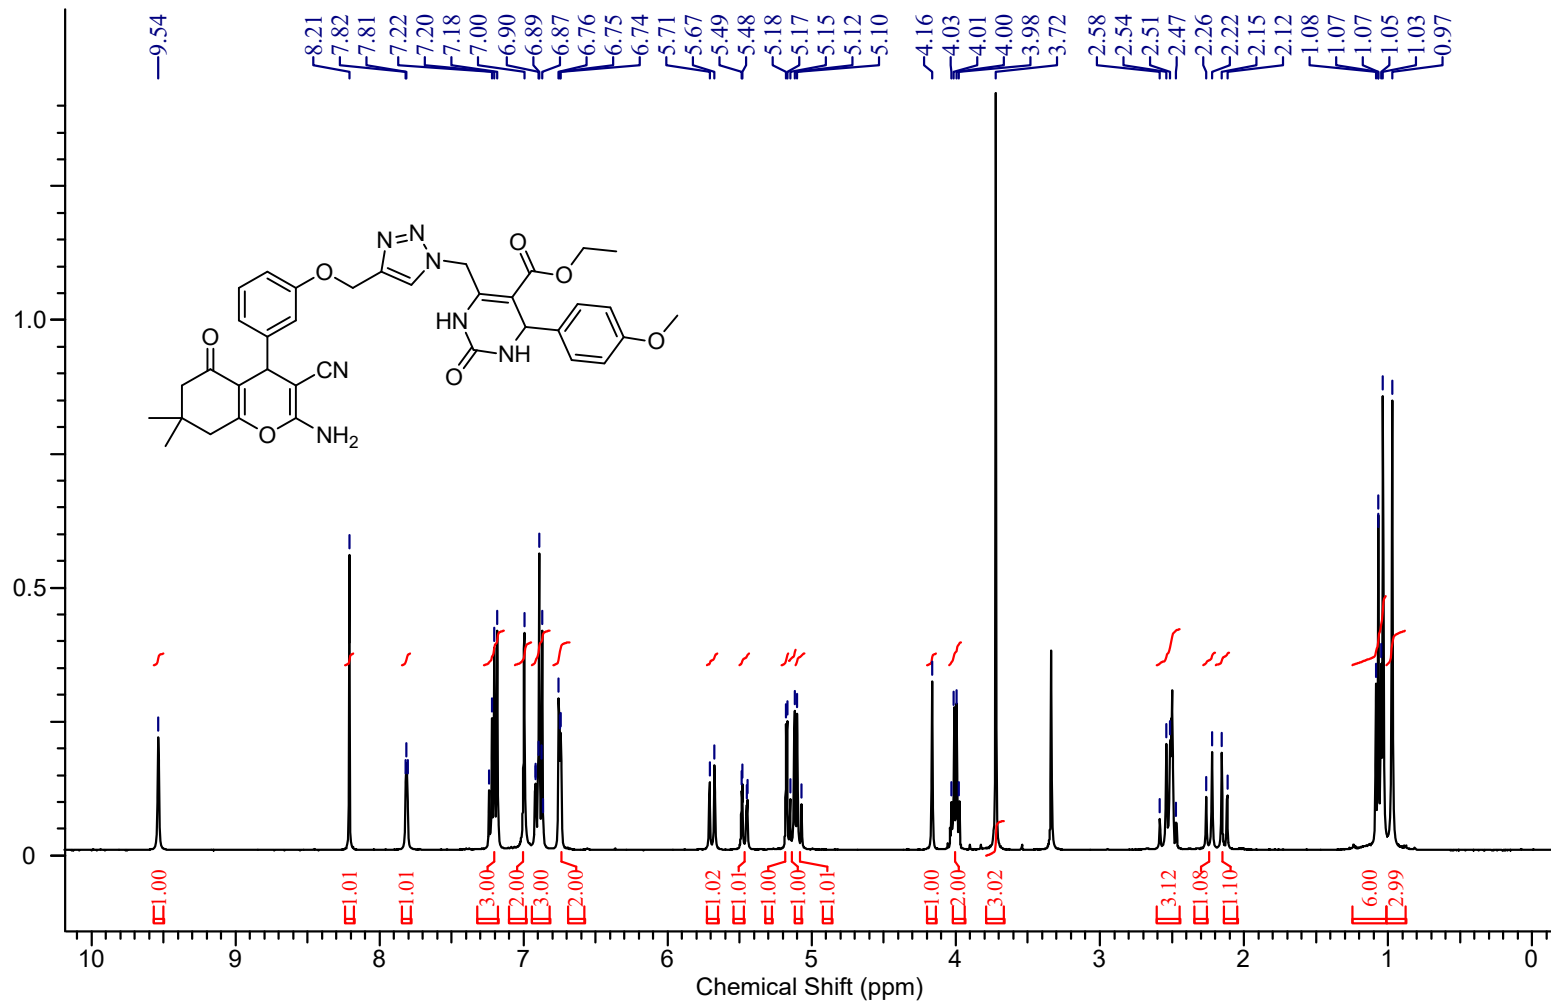

Figure S43: <sup>1</sup>H-NMR (400 MHz, DMSO-d<sub>6</sub>) of 15b.

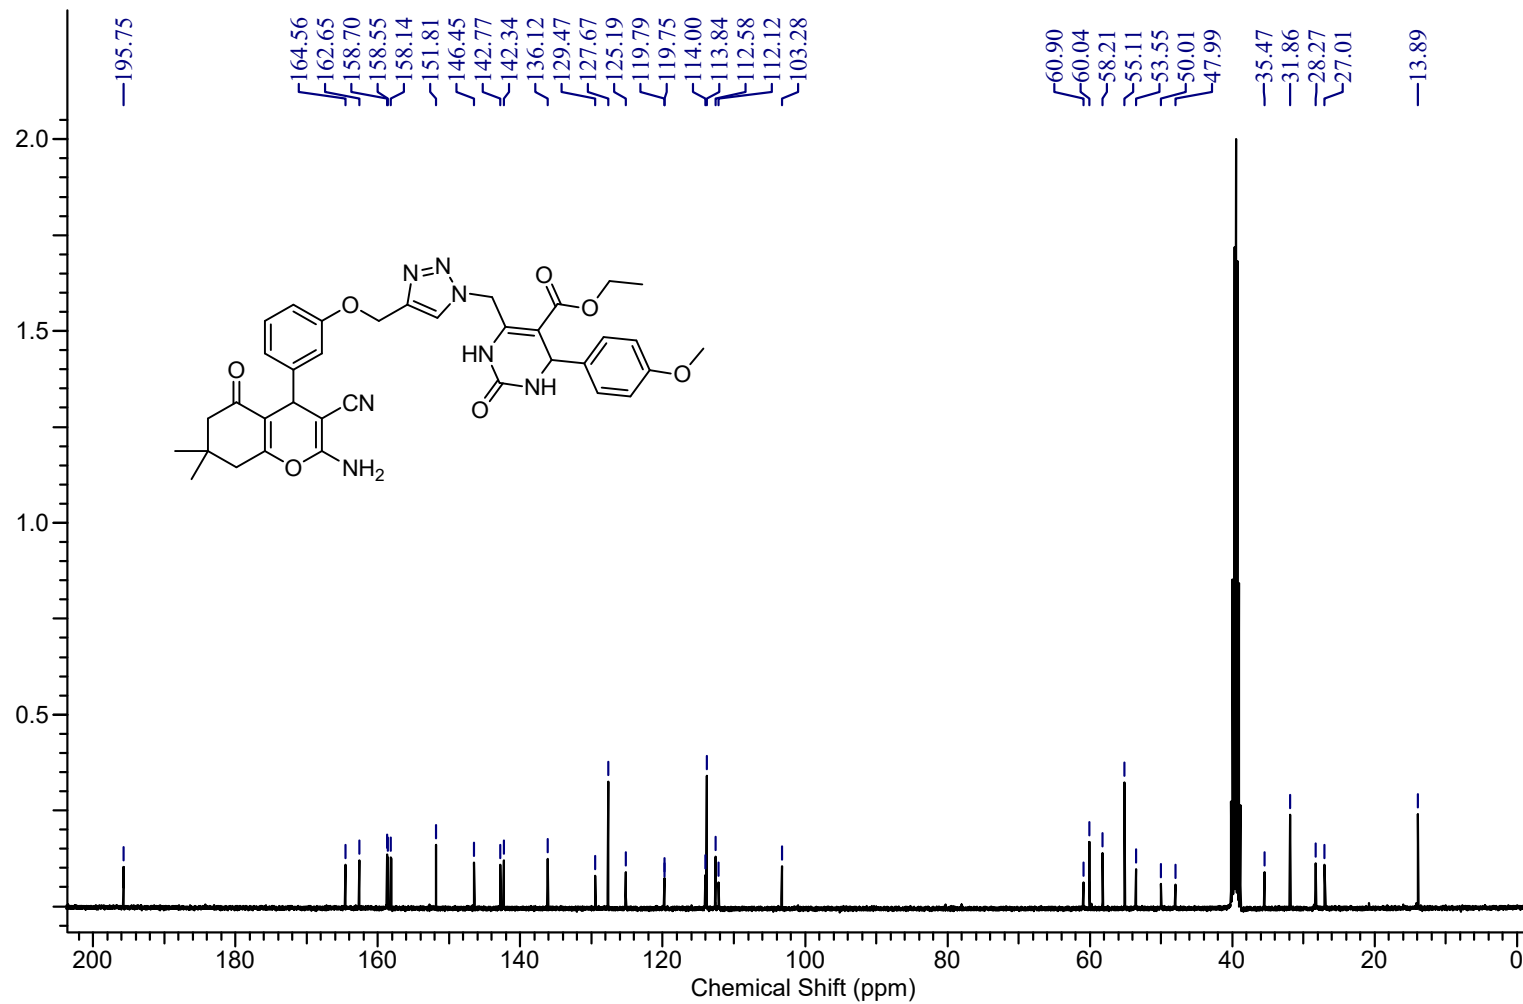

Figure S44:  $^{13}\text{C}$ -NMR (100 MHz,  $\text{DMSO-d}_6$ ) of 15b.

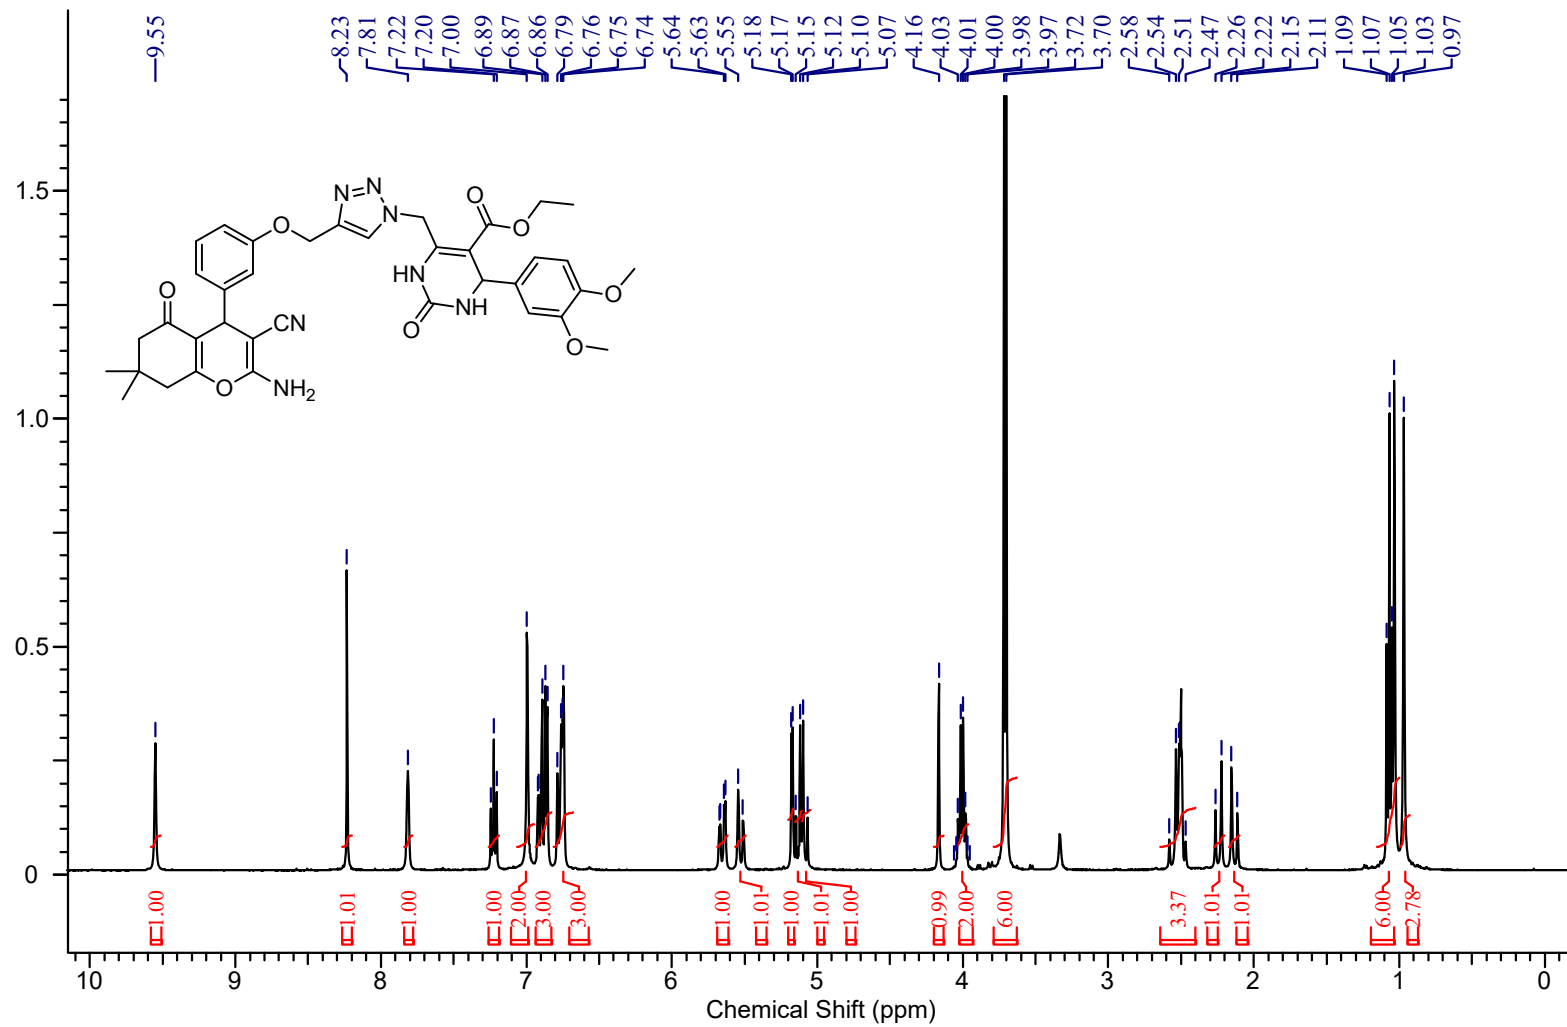

Figure S45: <sup>1</sup>H-NMR (400 MHz, DMSO-d<sub>6</sub>) of 15c.

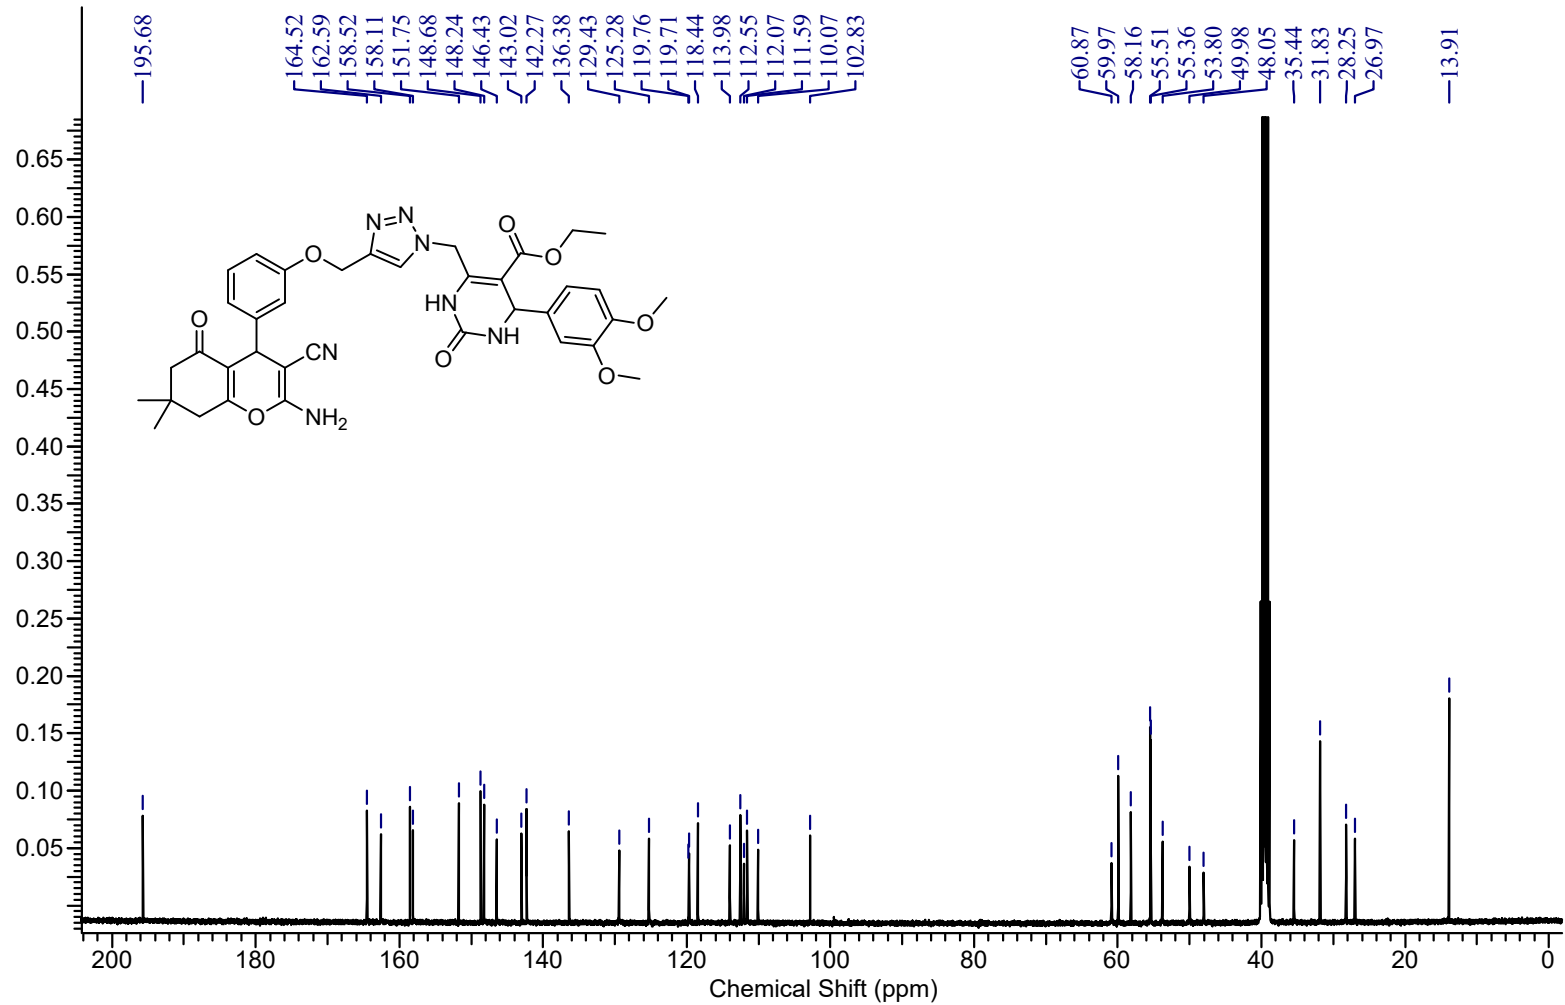

Figure S46:  $^{13}\text{C}$ -NMR (100 MHz,  $\text{DMSO-d}_6$ ) of 15c.

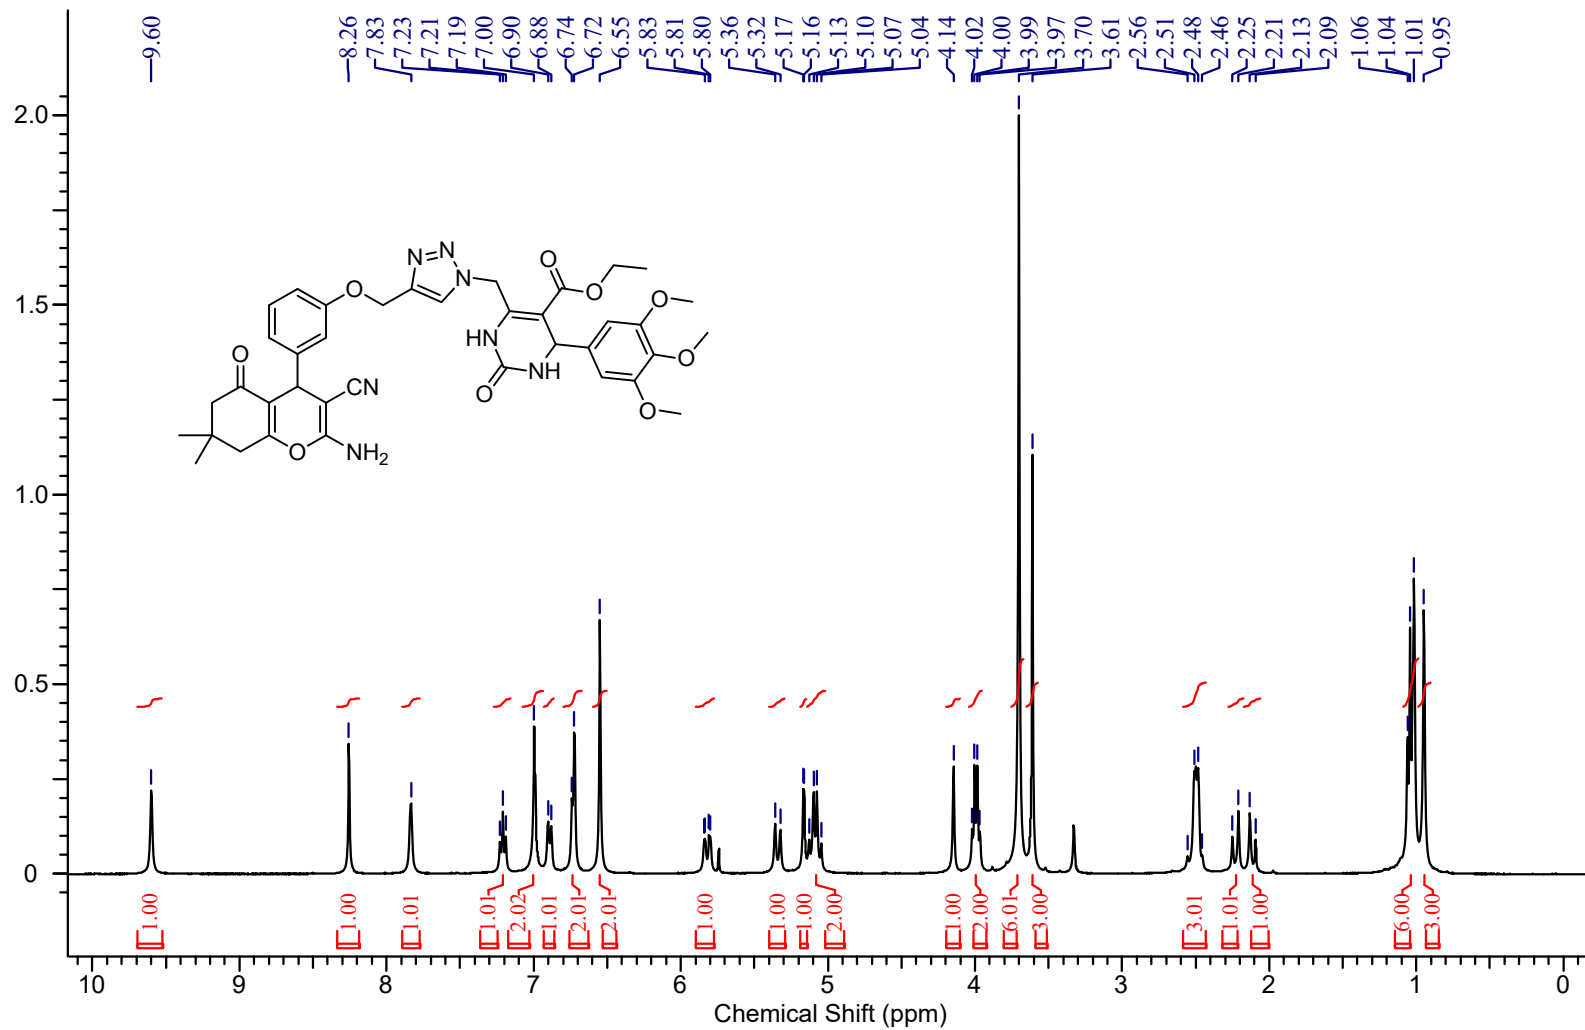

Figure S47: <sup>1</sup>H-NMR (400 MHz, DMSO-d<sub>6</sub>) of 15d.



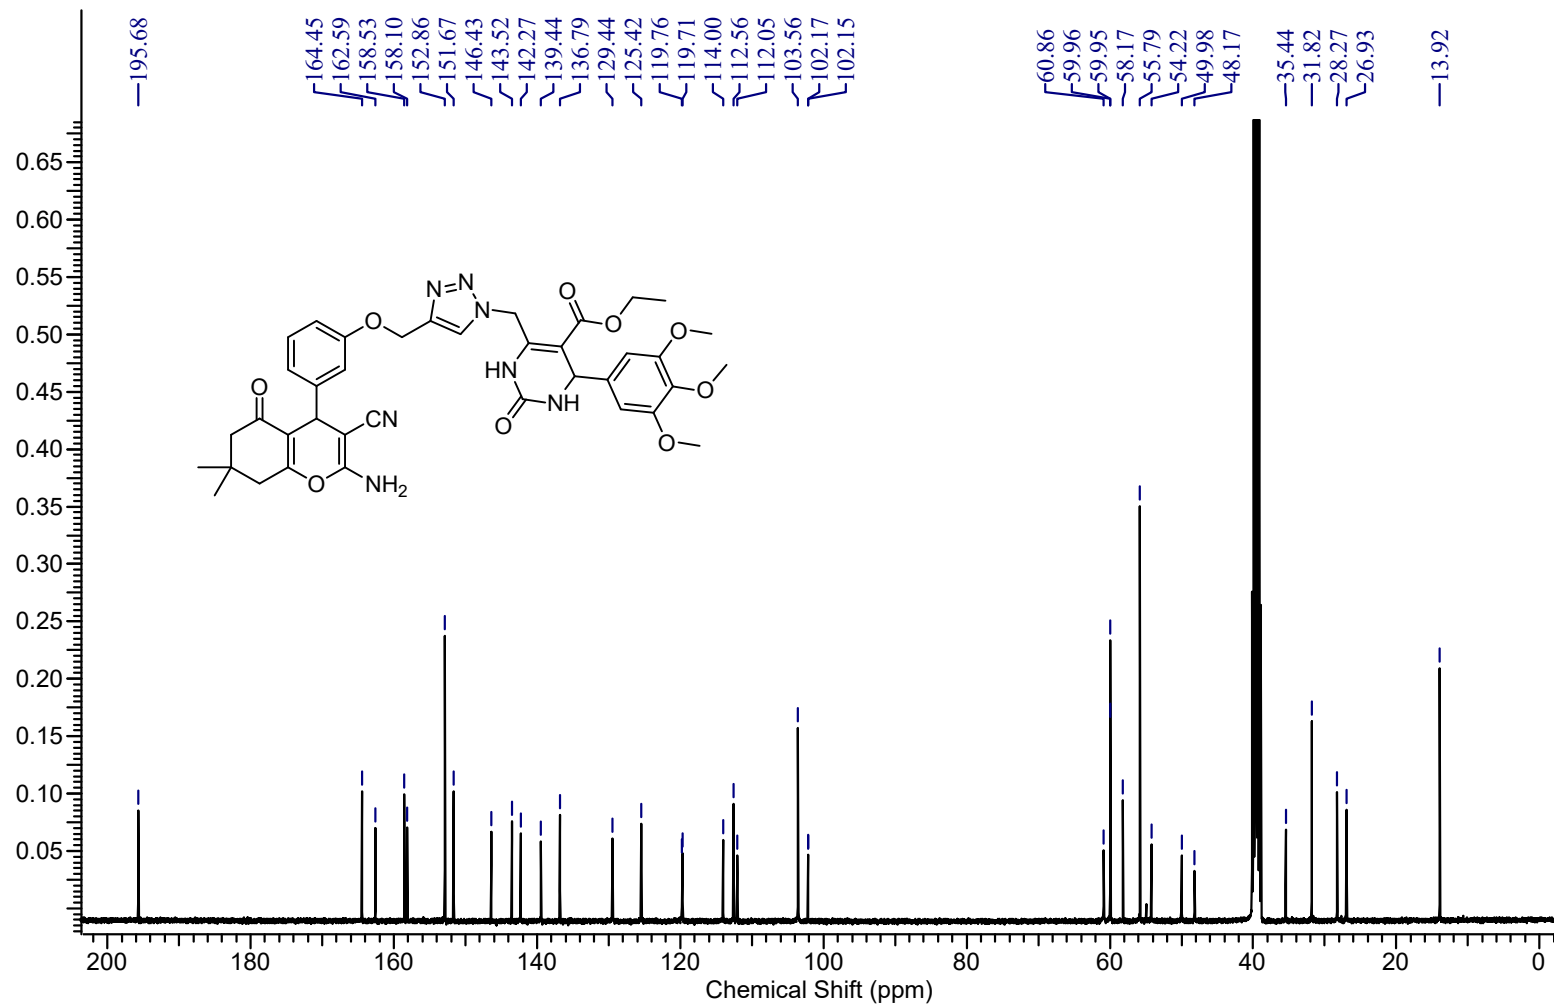

Figure S48:  $^{13}\text{C}$ -NMR (100 MHz,  $\text{DMSO-d}_6$ ) of 15d.

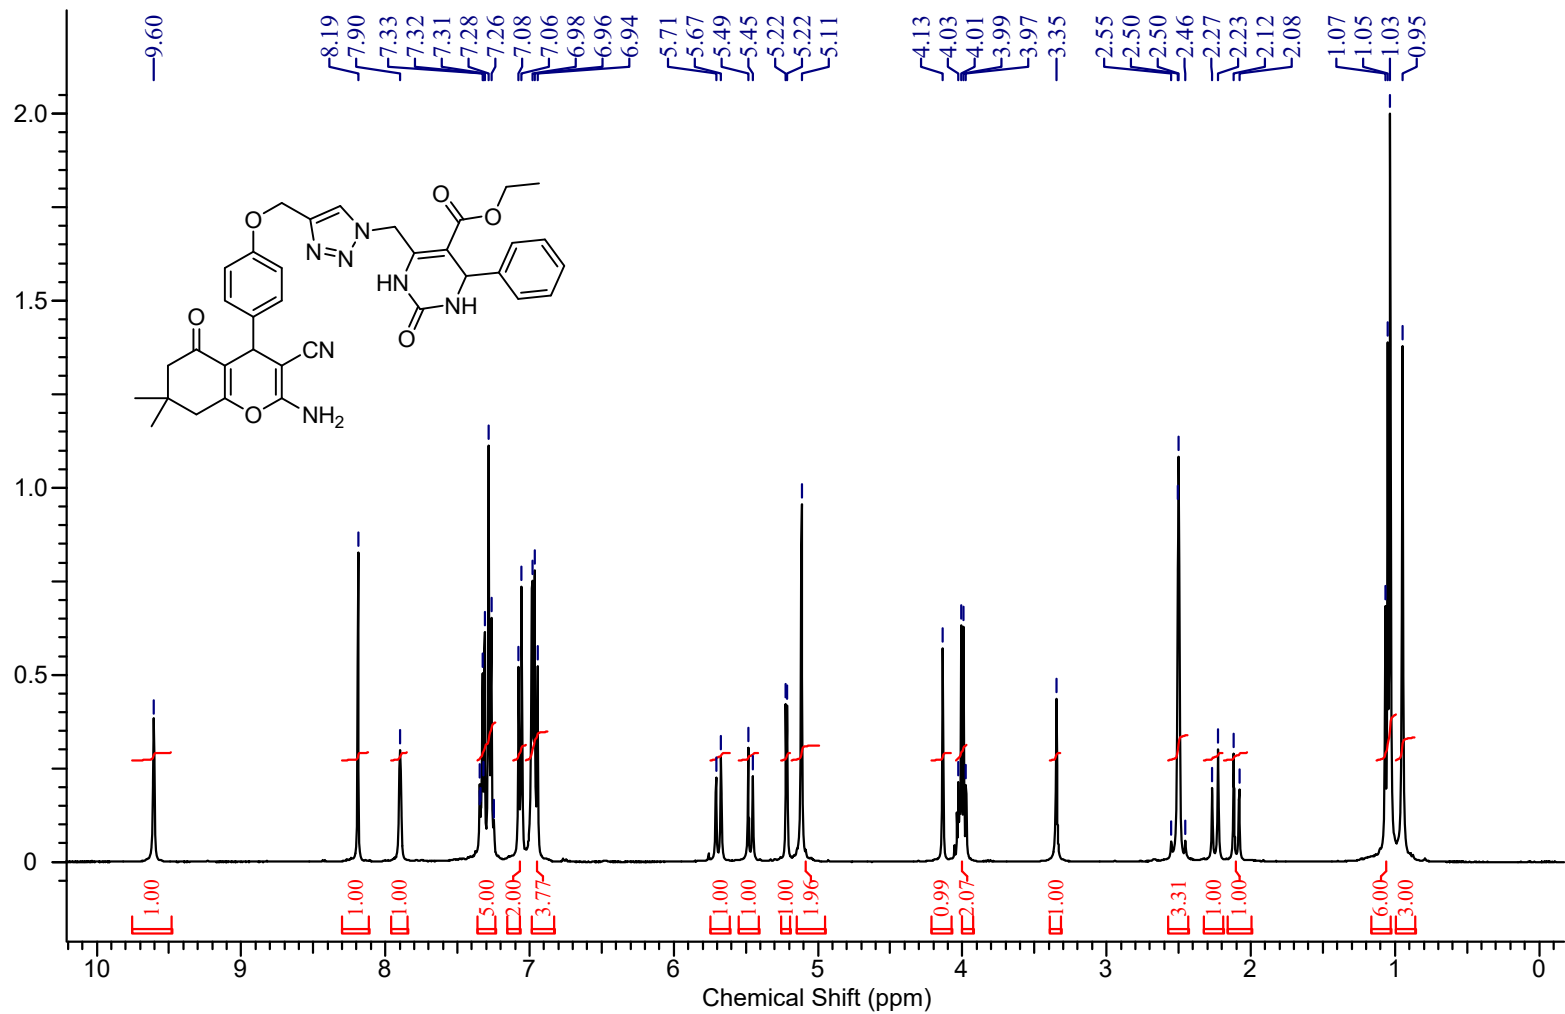

Figure S49: <sup>1</sup>H-NMR (400 MHz, DMSO-d<sub>6</sub>) of 15e.

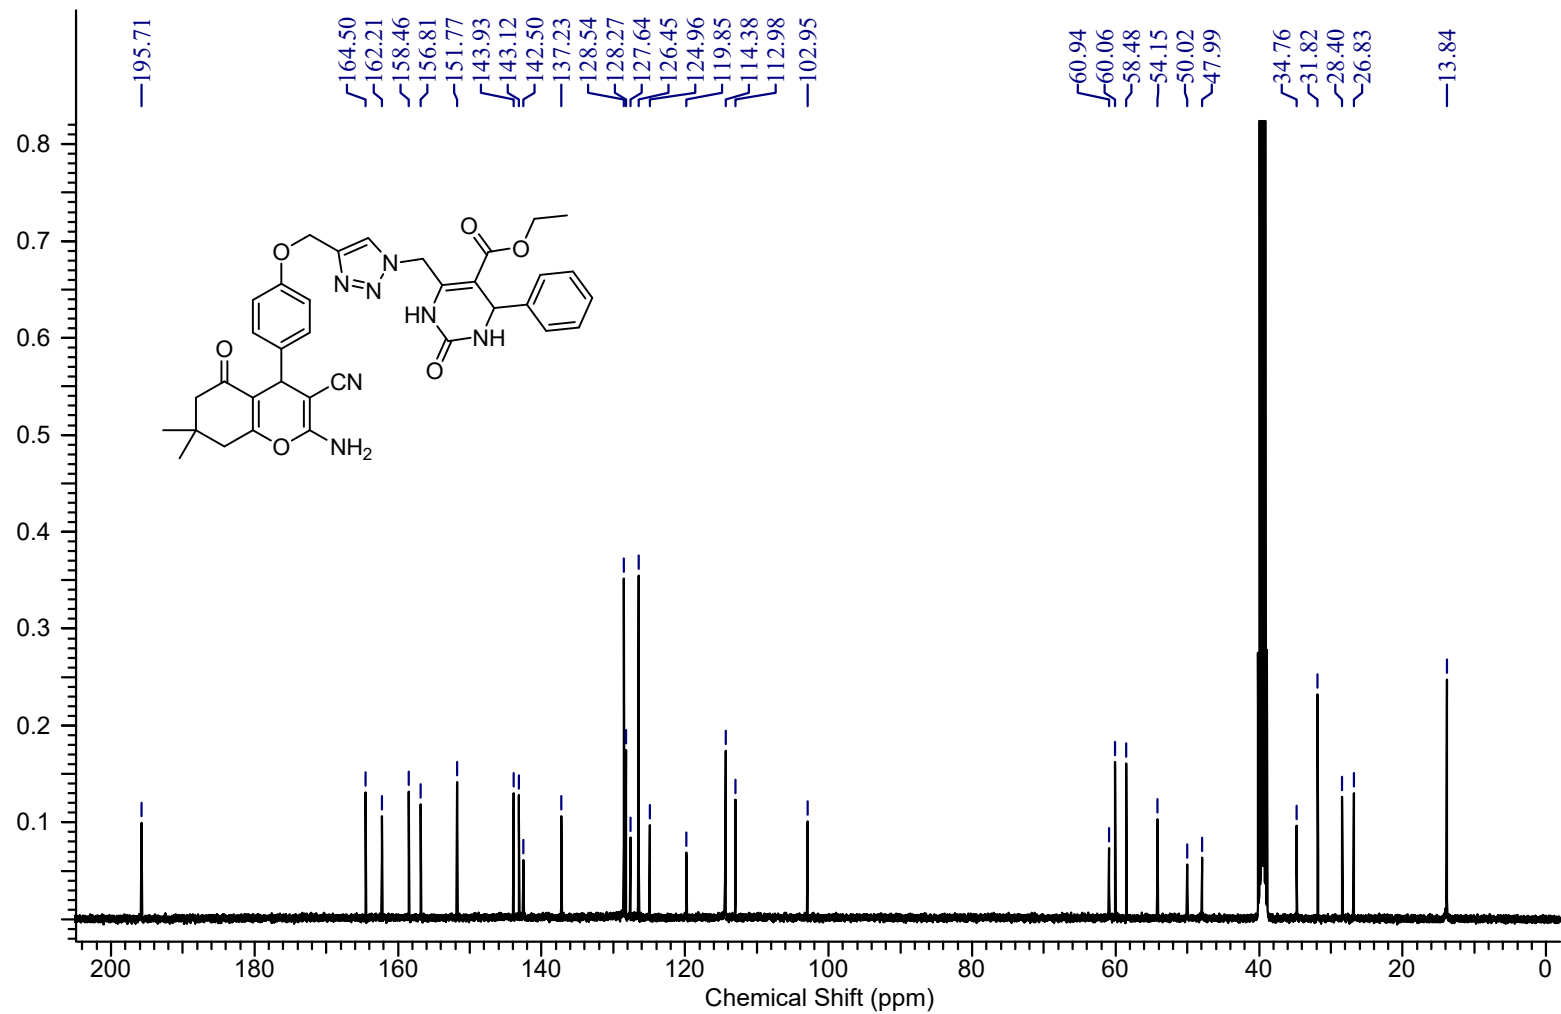

Figure S50:  $^{13}\text{C}$ -NMR (100 MHz,  $\text{DMSO-d}_6$ ) of 15e.

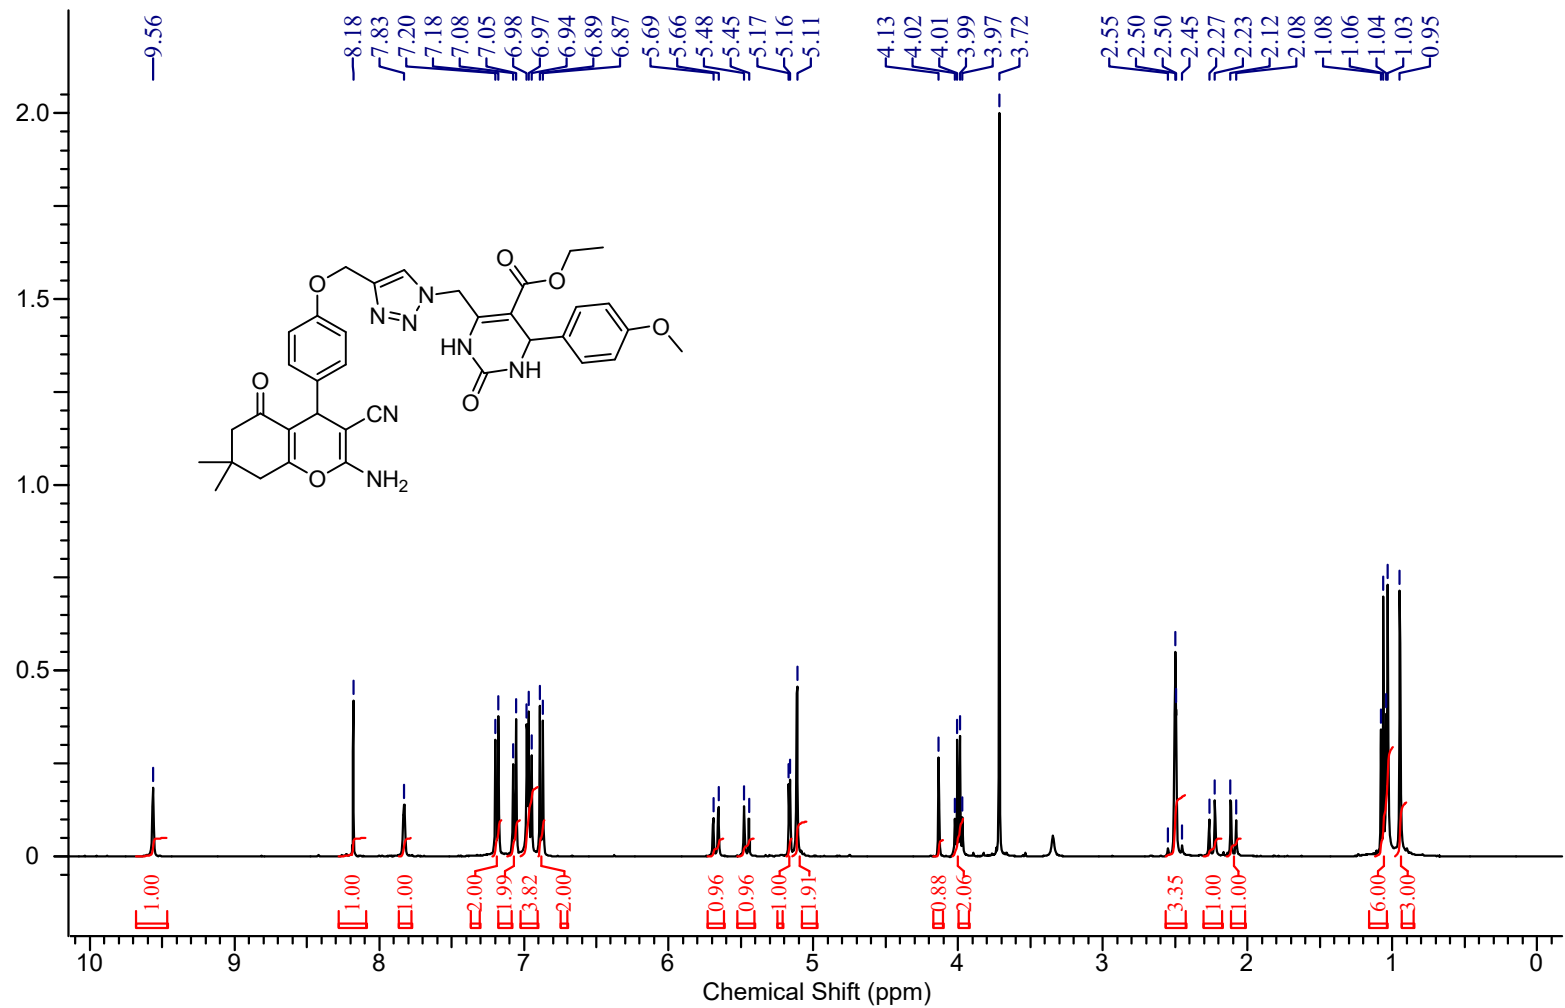

Figure S51: <sup>1</sup>H-NMR (400 MHz, DMSO-d<sub>6</sub>) of 15f.

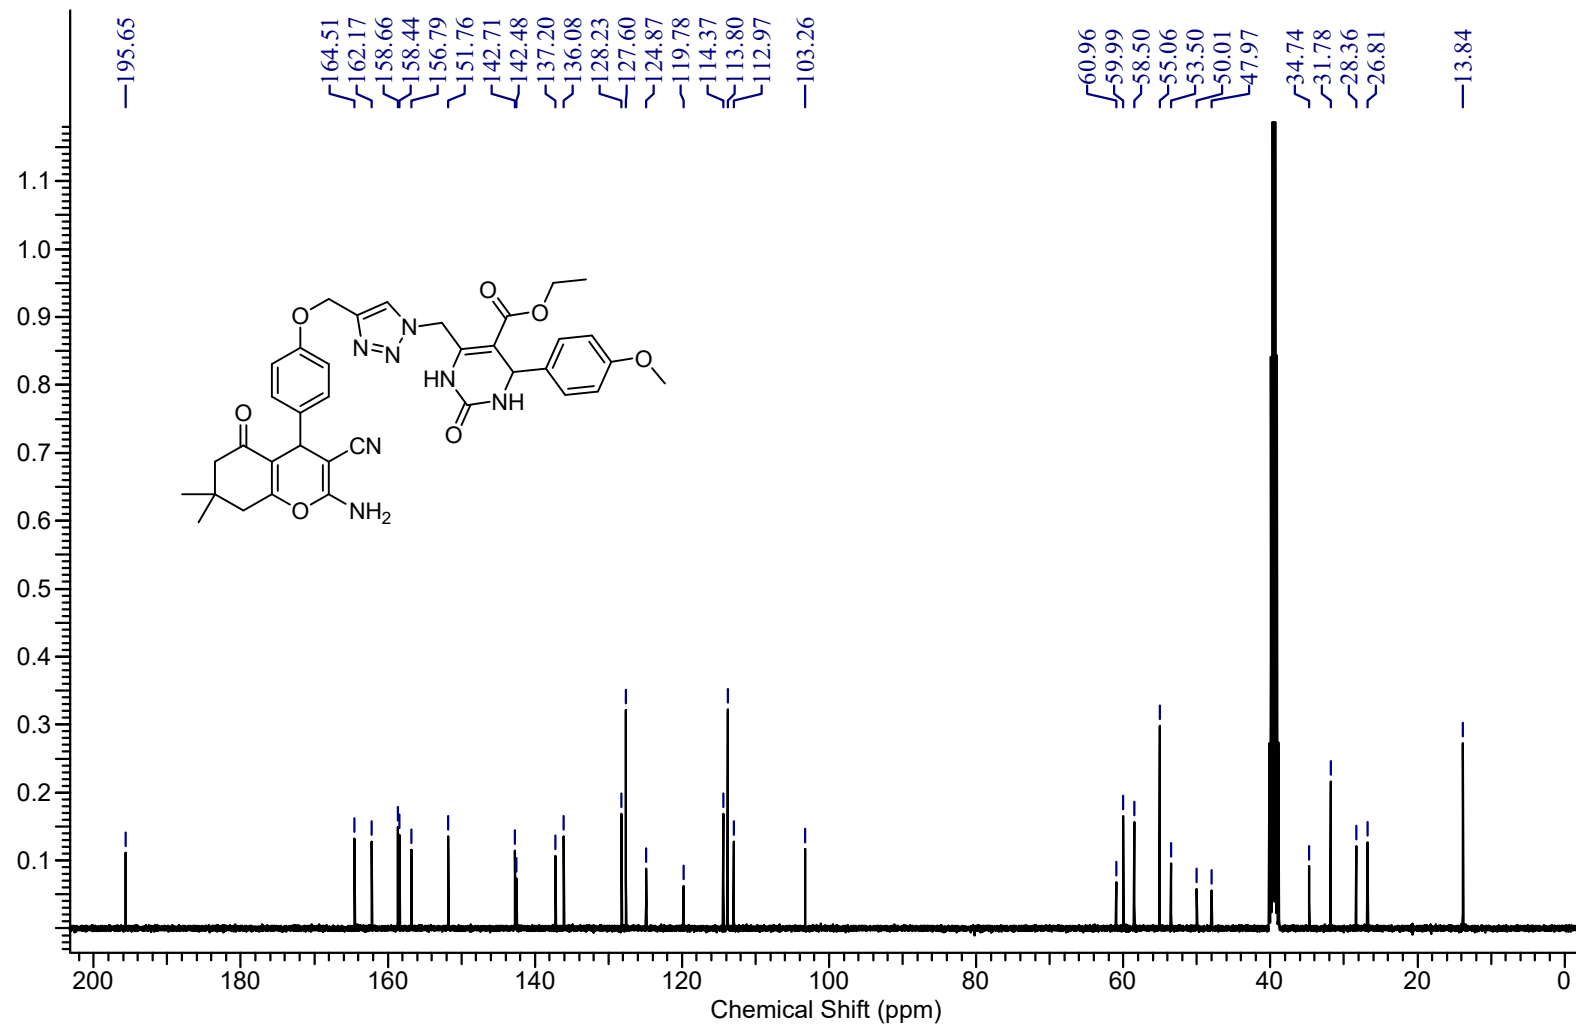

Figure S52:  $^{13}\text{C}$ -NMR (100 MHz,  $\text{DMSO-d}_6$ ) of 15f.

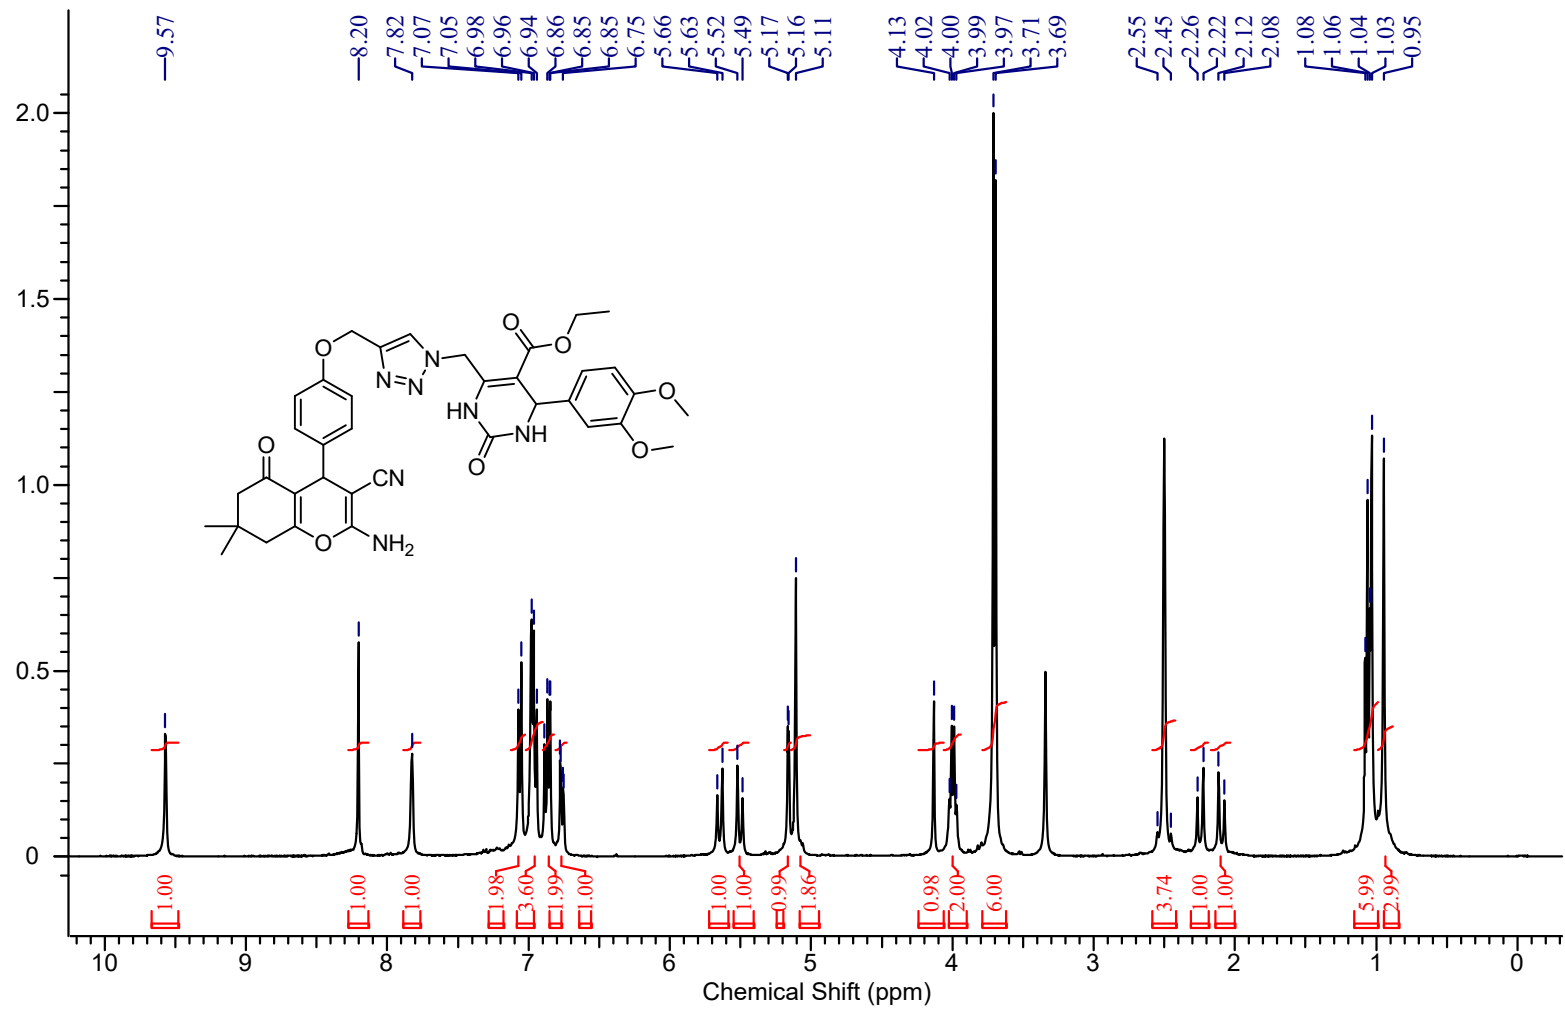

Figure S53: <sup>1</sup>H-NMR (400 MHz, DMSO-d<sub>6</sub>) of 15g.

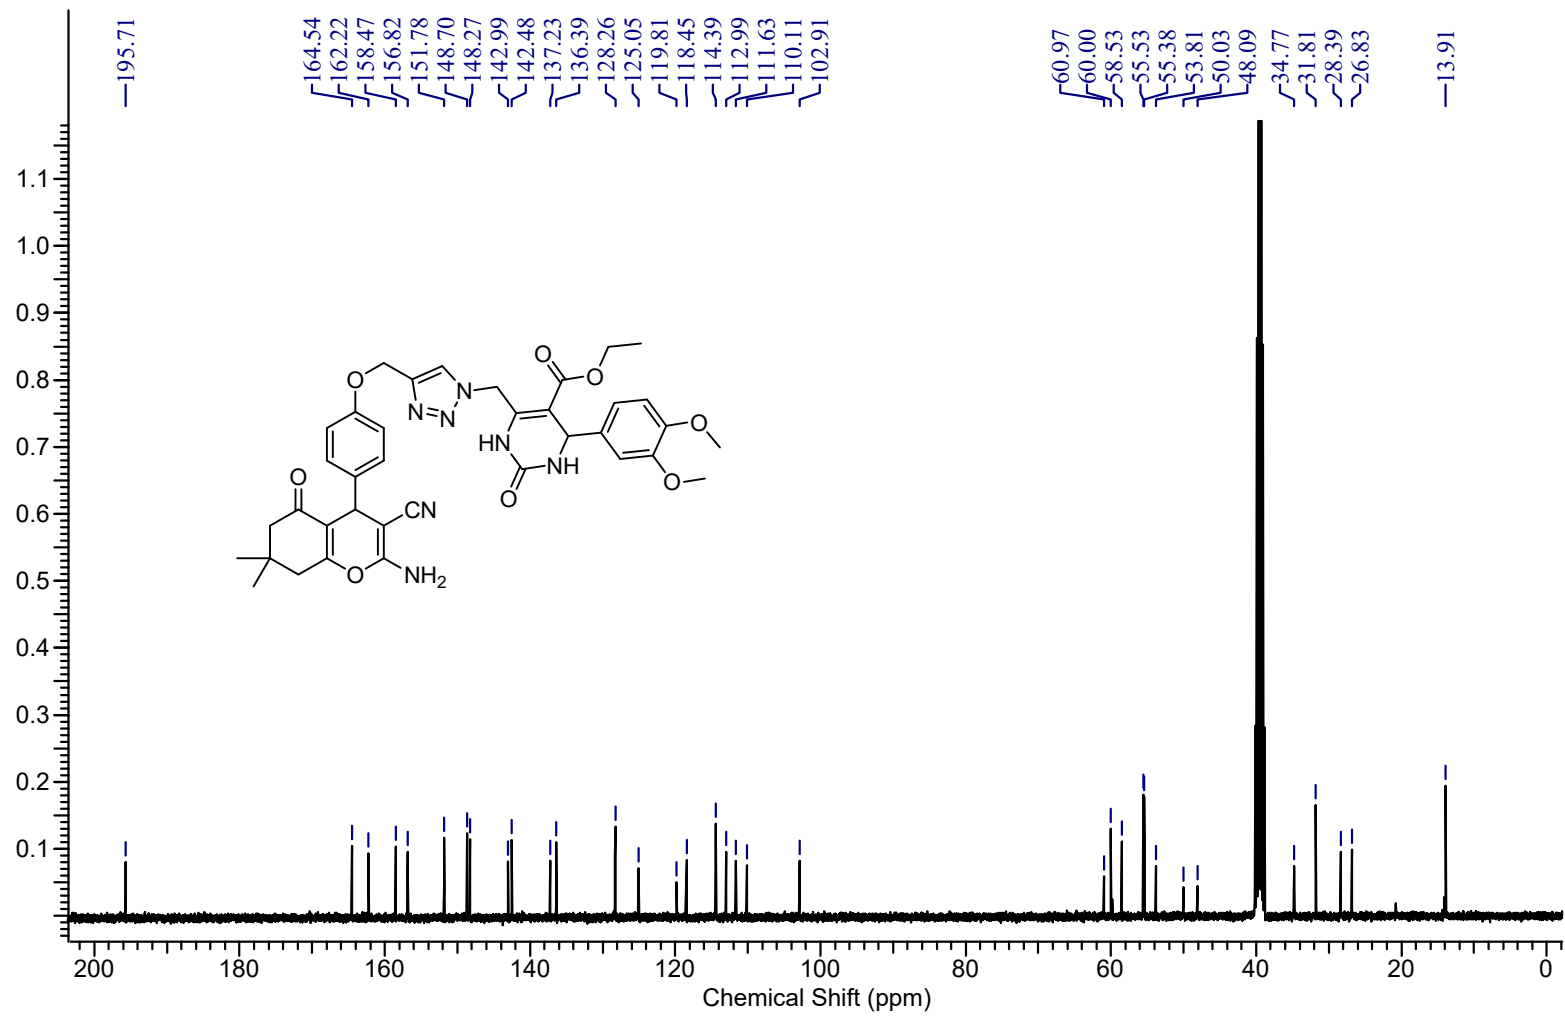

Figure S54:  $^{13}\text{C}$ -NMR (100 MHz,  $\text{DMSO-d}_6$ ) of 15g.

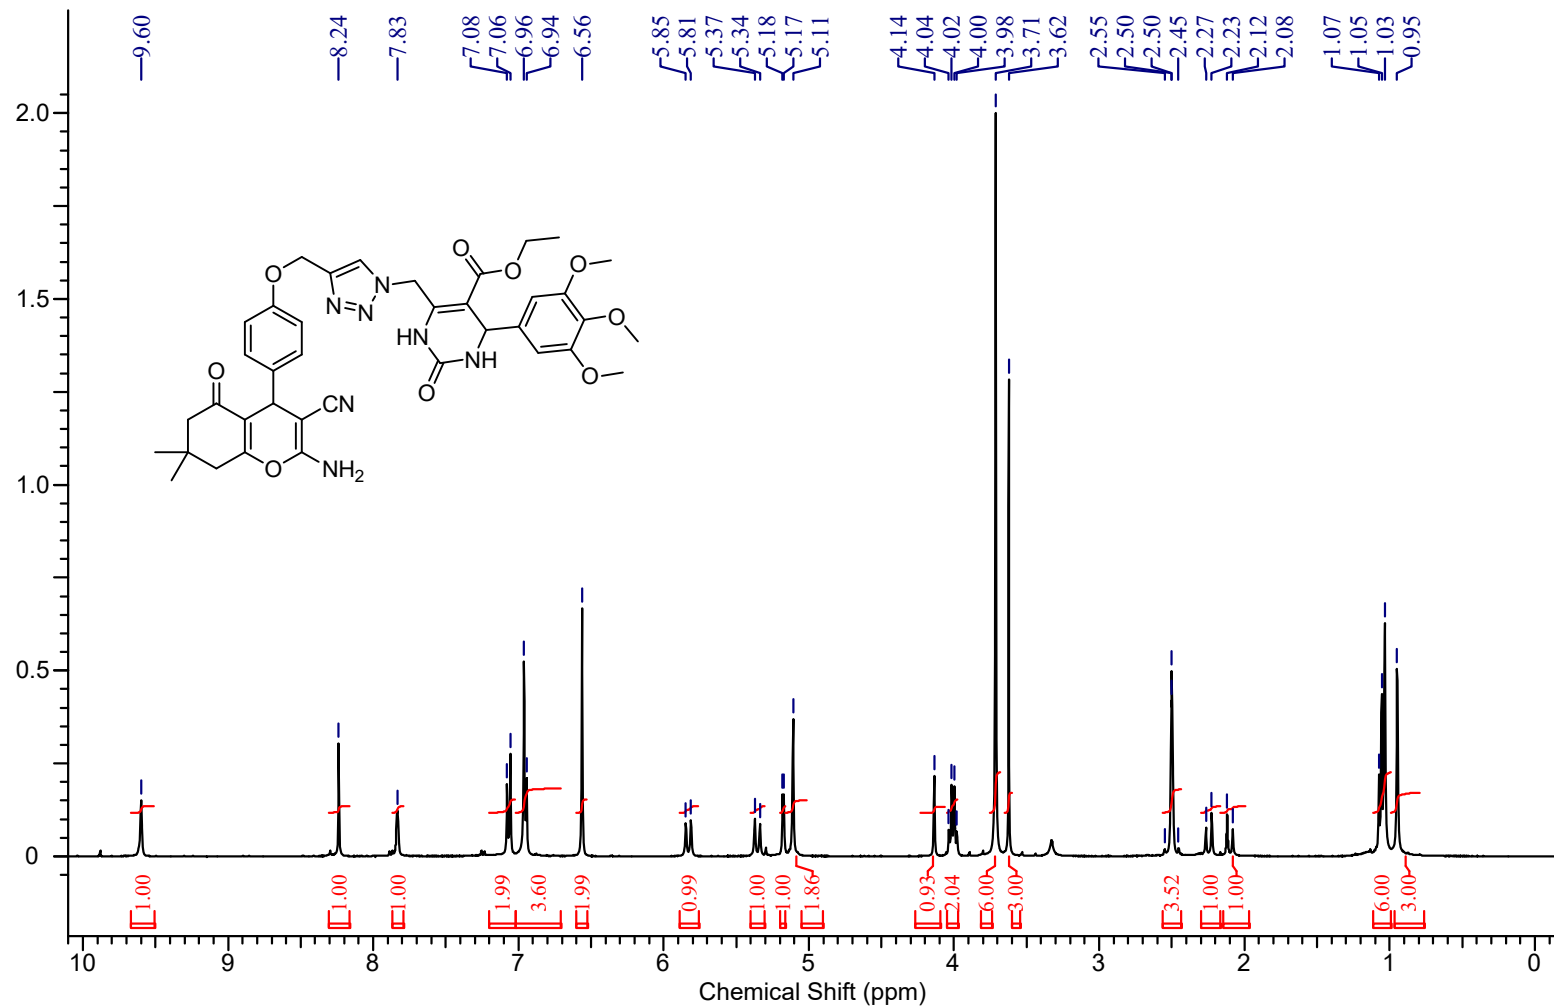

Figure S55: <sup>1</sup>H-NMR (400 MHz, DMSO-d<sub>6</sub>) of 15h.



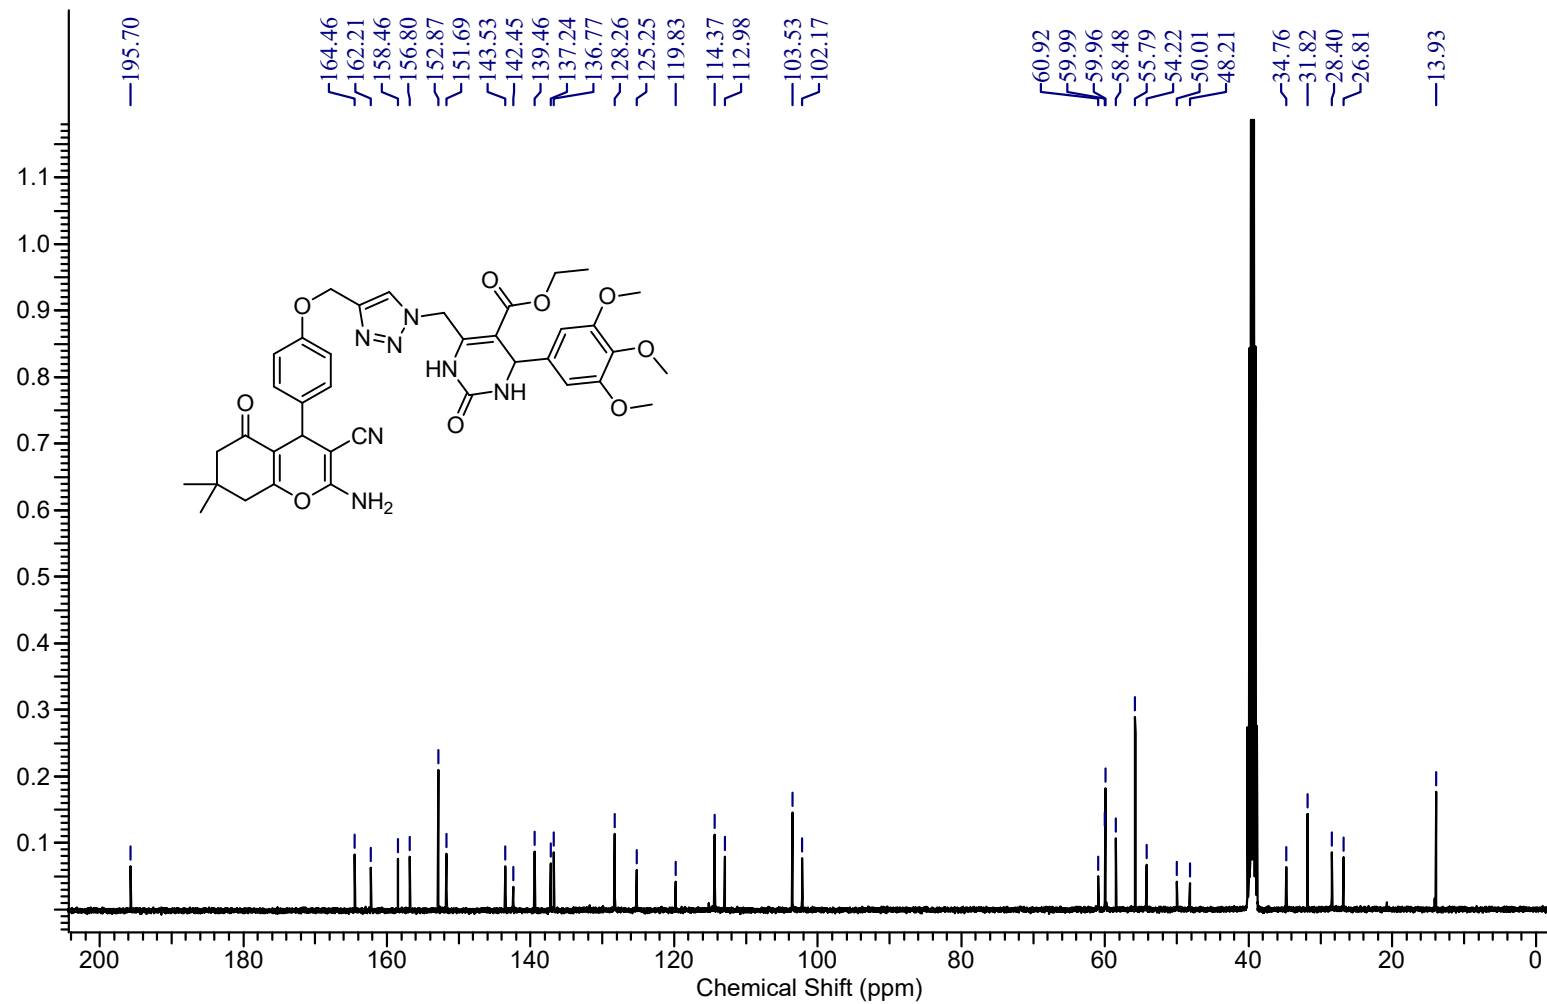

Figure S56:  $^{13}\text{C}$ -NMR (100 MHz,  $\text{DMSO-d}_6$ ) of 15h.

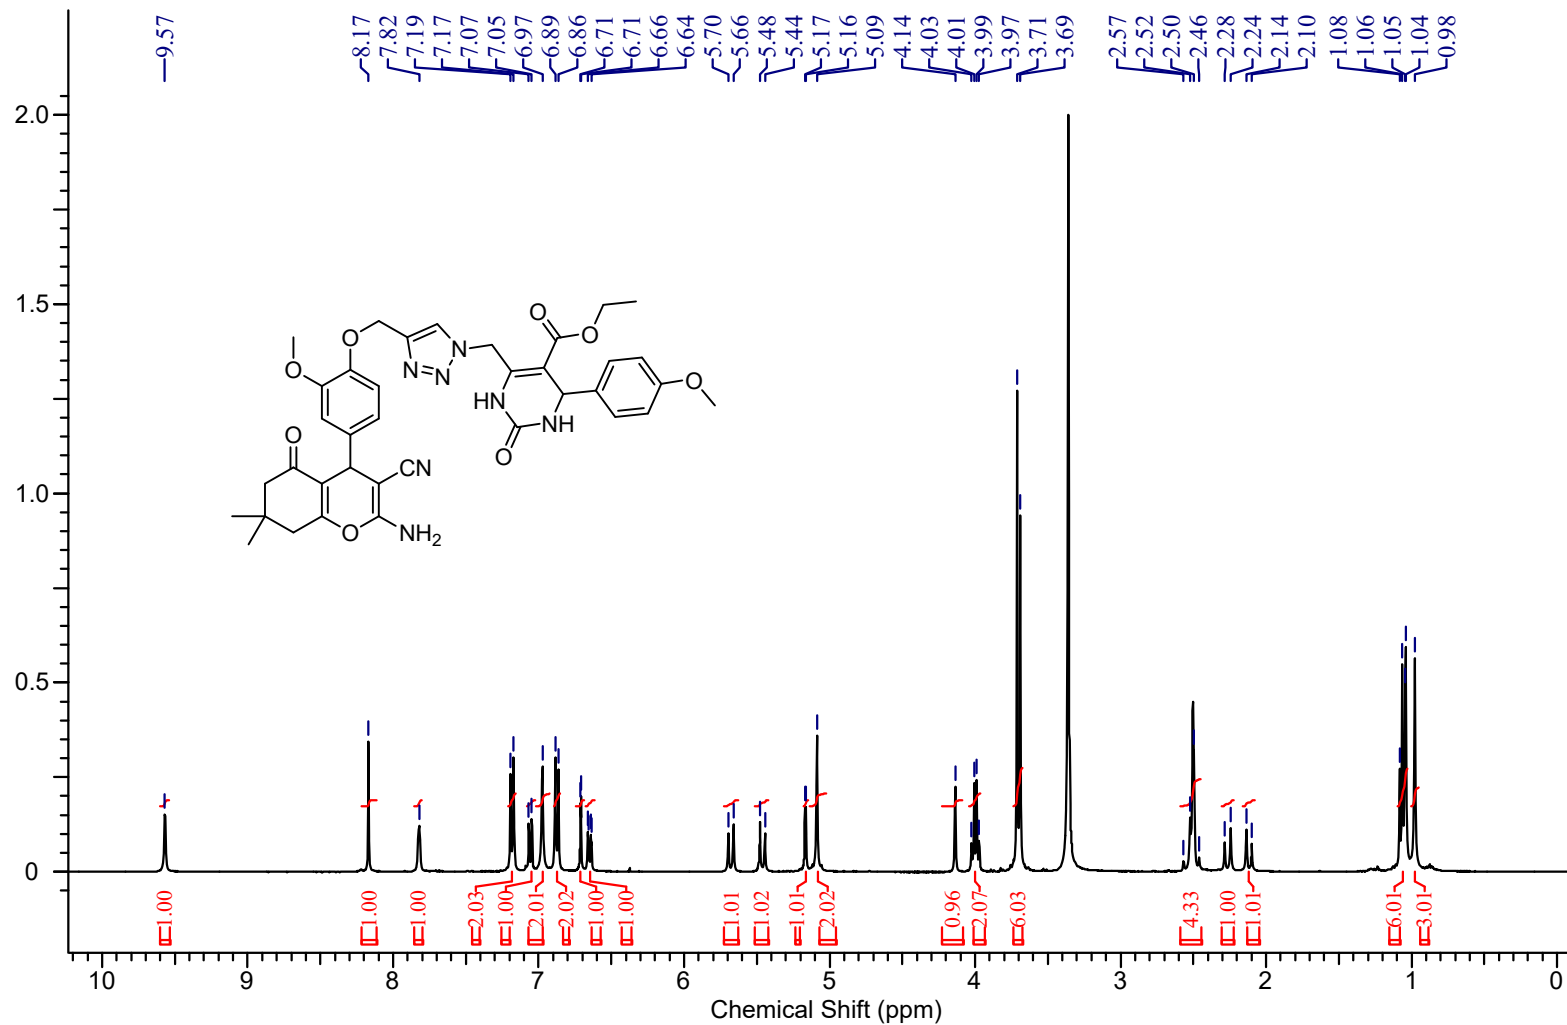

Figure S57: <sup>1</sup>H-NMR (400 MHz, DMSO-d<sub>6</sub>) of 15i.

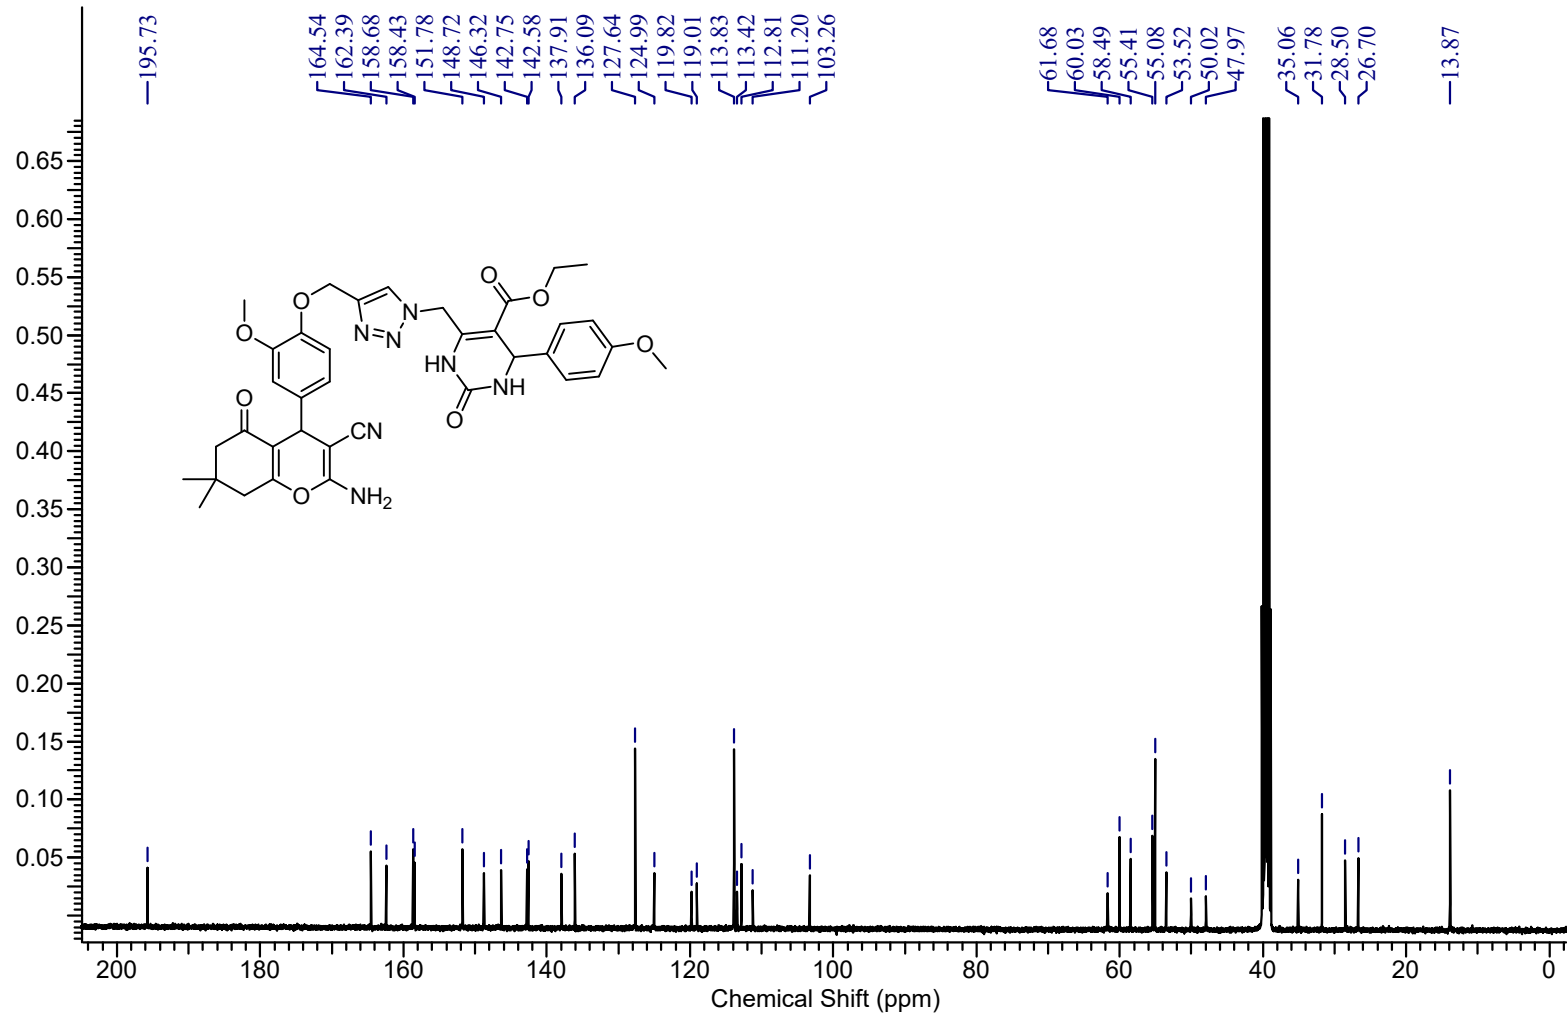

Figure S58:  $^{13}\text{C}$ -NMR (100 MHz,  $\text{DMSO-d}_6$ ) of 15i.

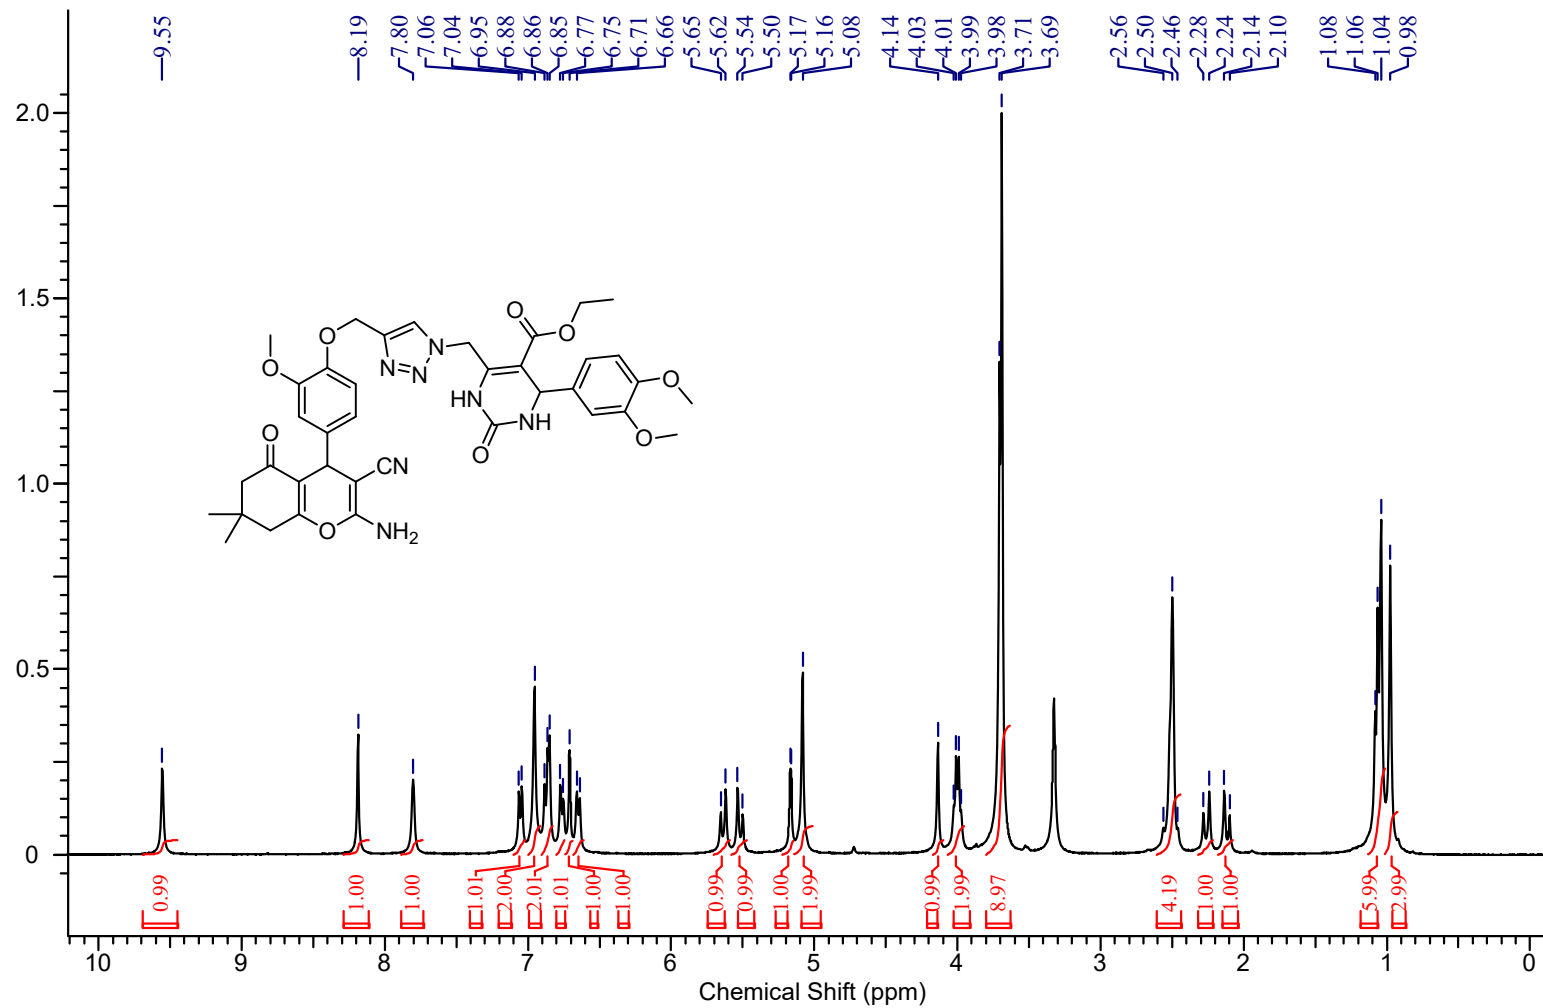

Figure S59: <sup>1</sup>H-NMR (400 MHz, DMSO-d<sub>6</sub>) of 15j.

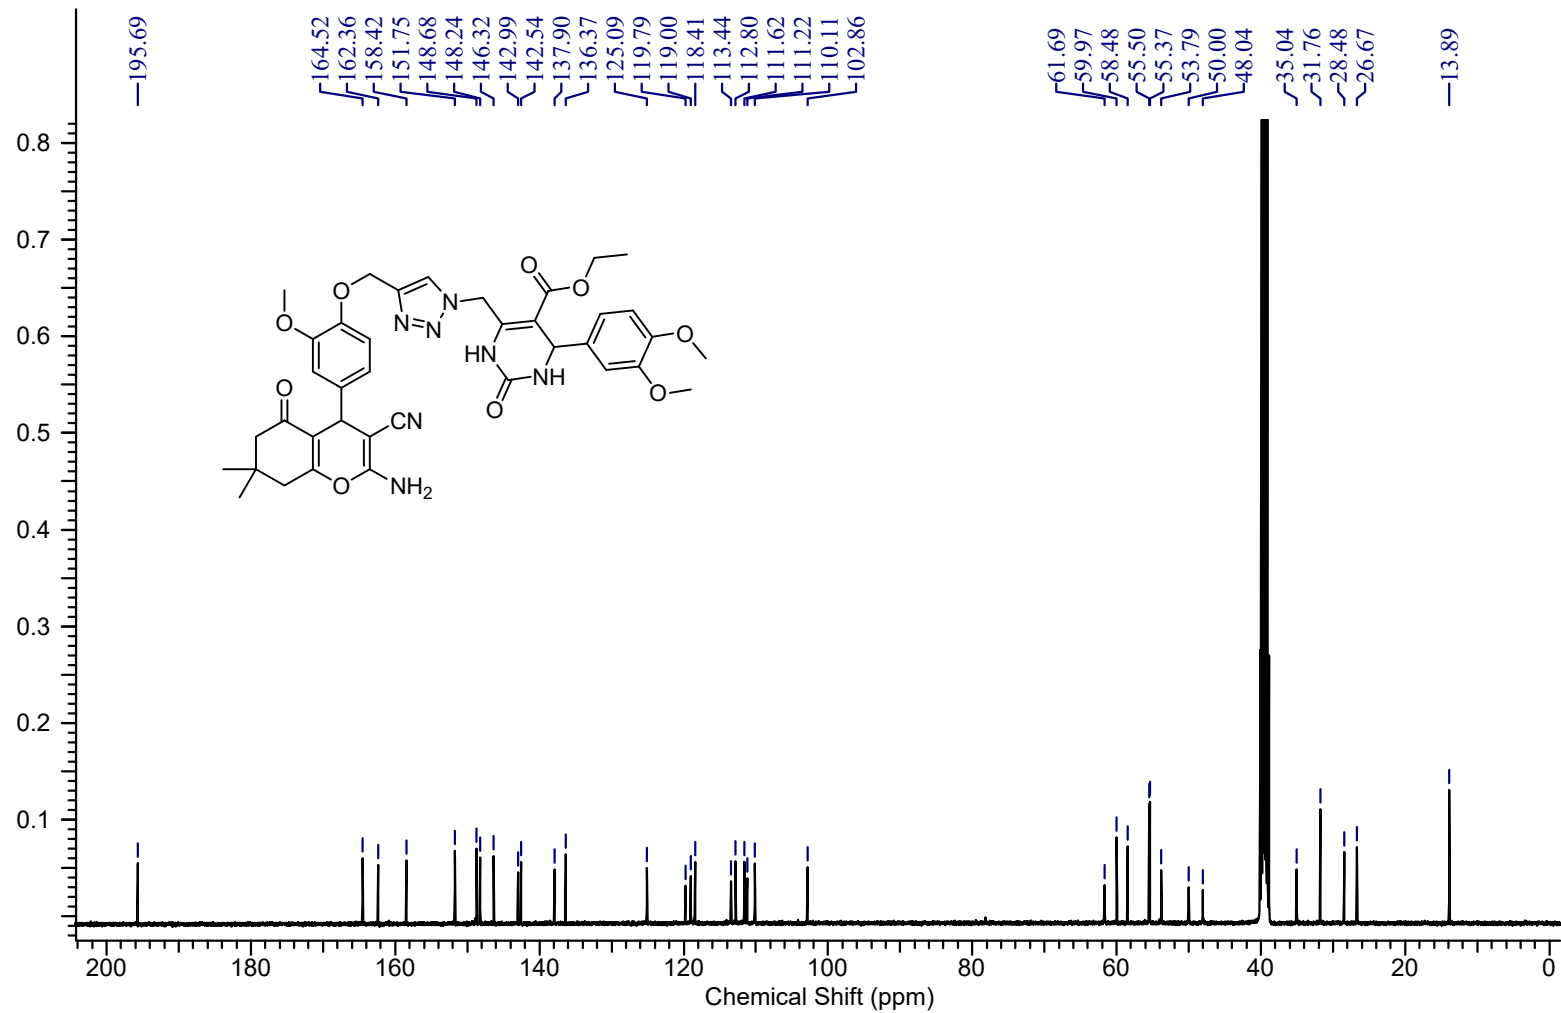

Figure S60:  $^{13}\text{C}$ -NMR (100 MHz,  $\text{DMSO-d}_6$ ) of 15j.

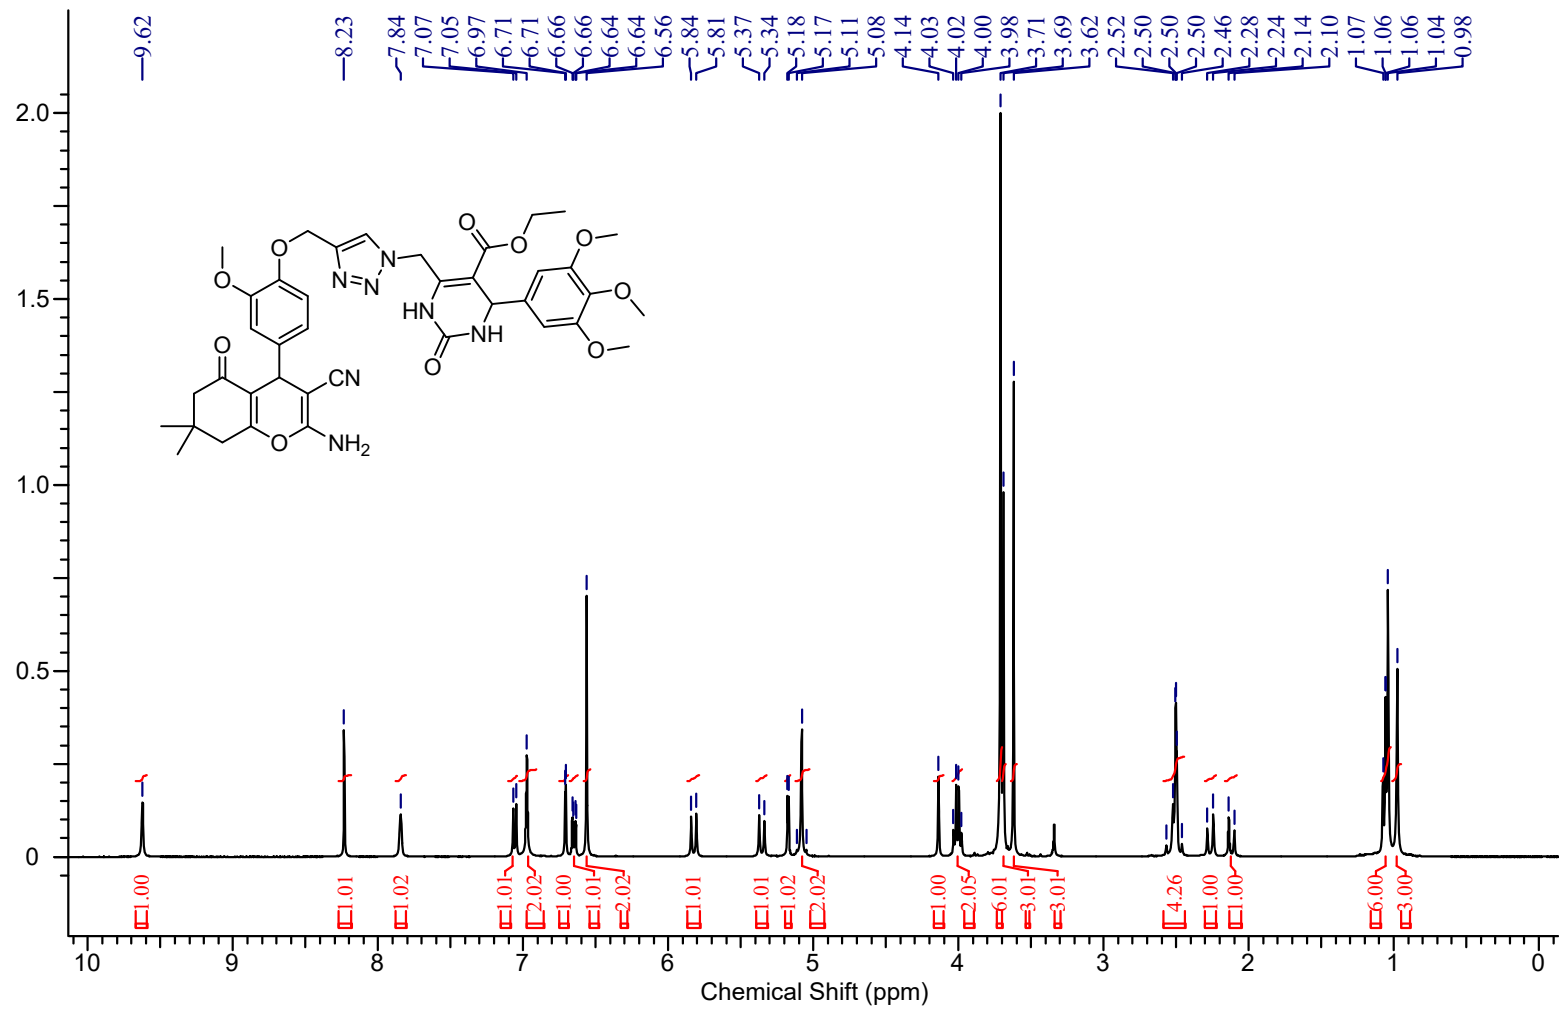

Figure S61: <sup>1</sup>H-NMR (400 MHz, DMSO-d<sub>6</sub>) of 15k.

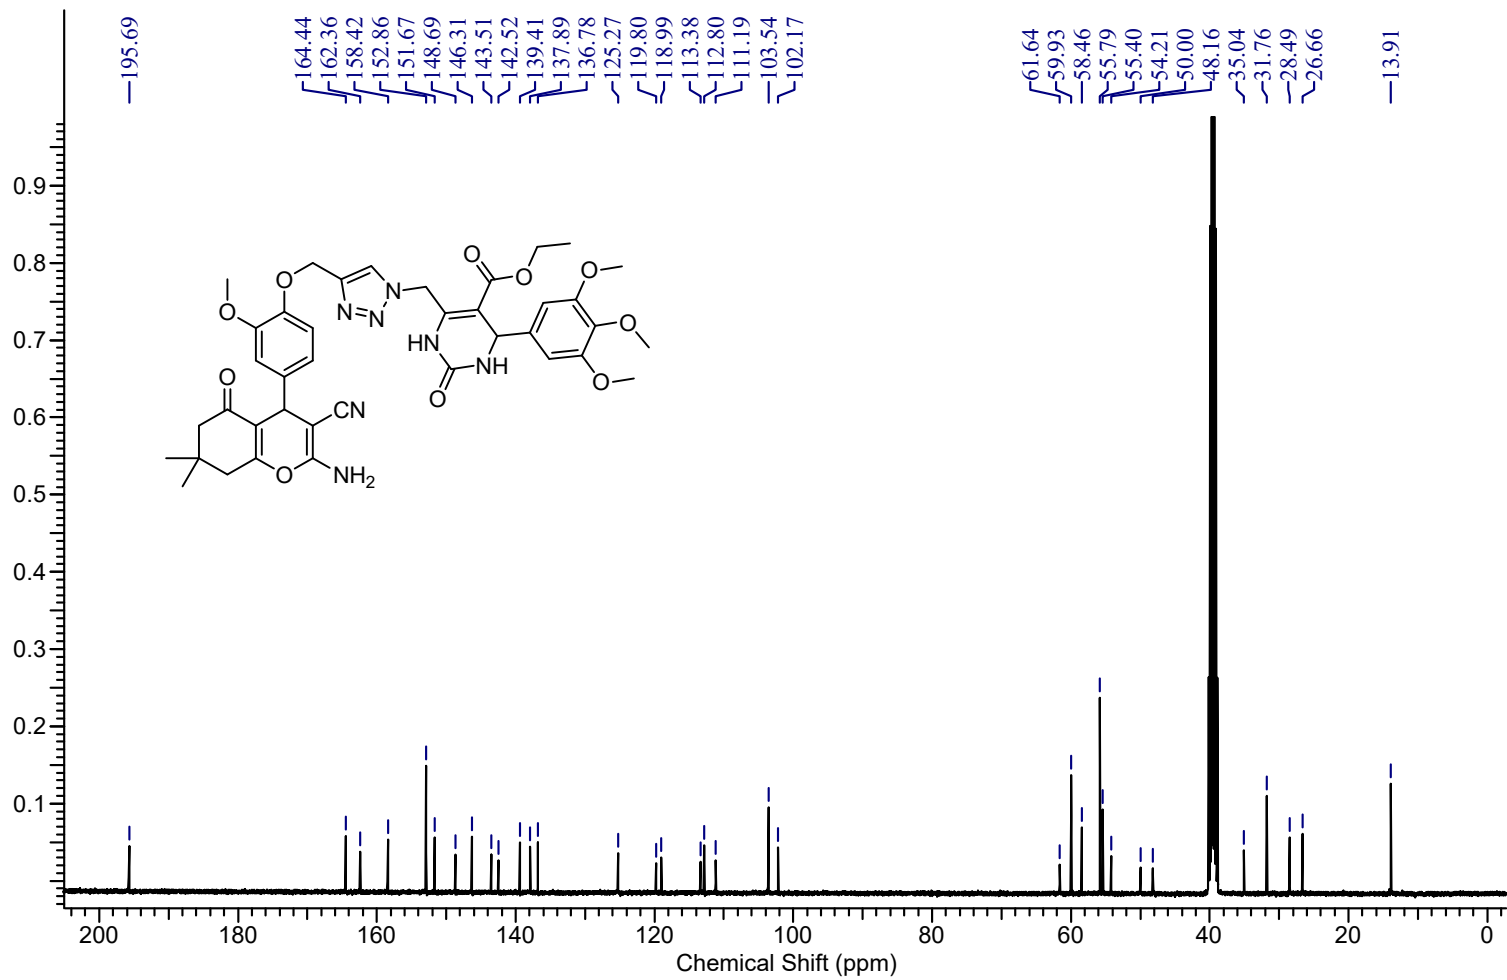

Figure S62: <sup>13</sup>C-NMR (100 MHz, DMSO-d<sub>6</sub>) of 15k.

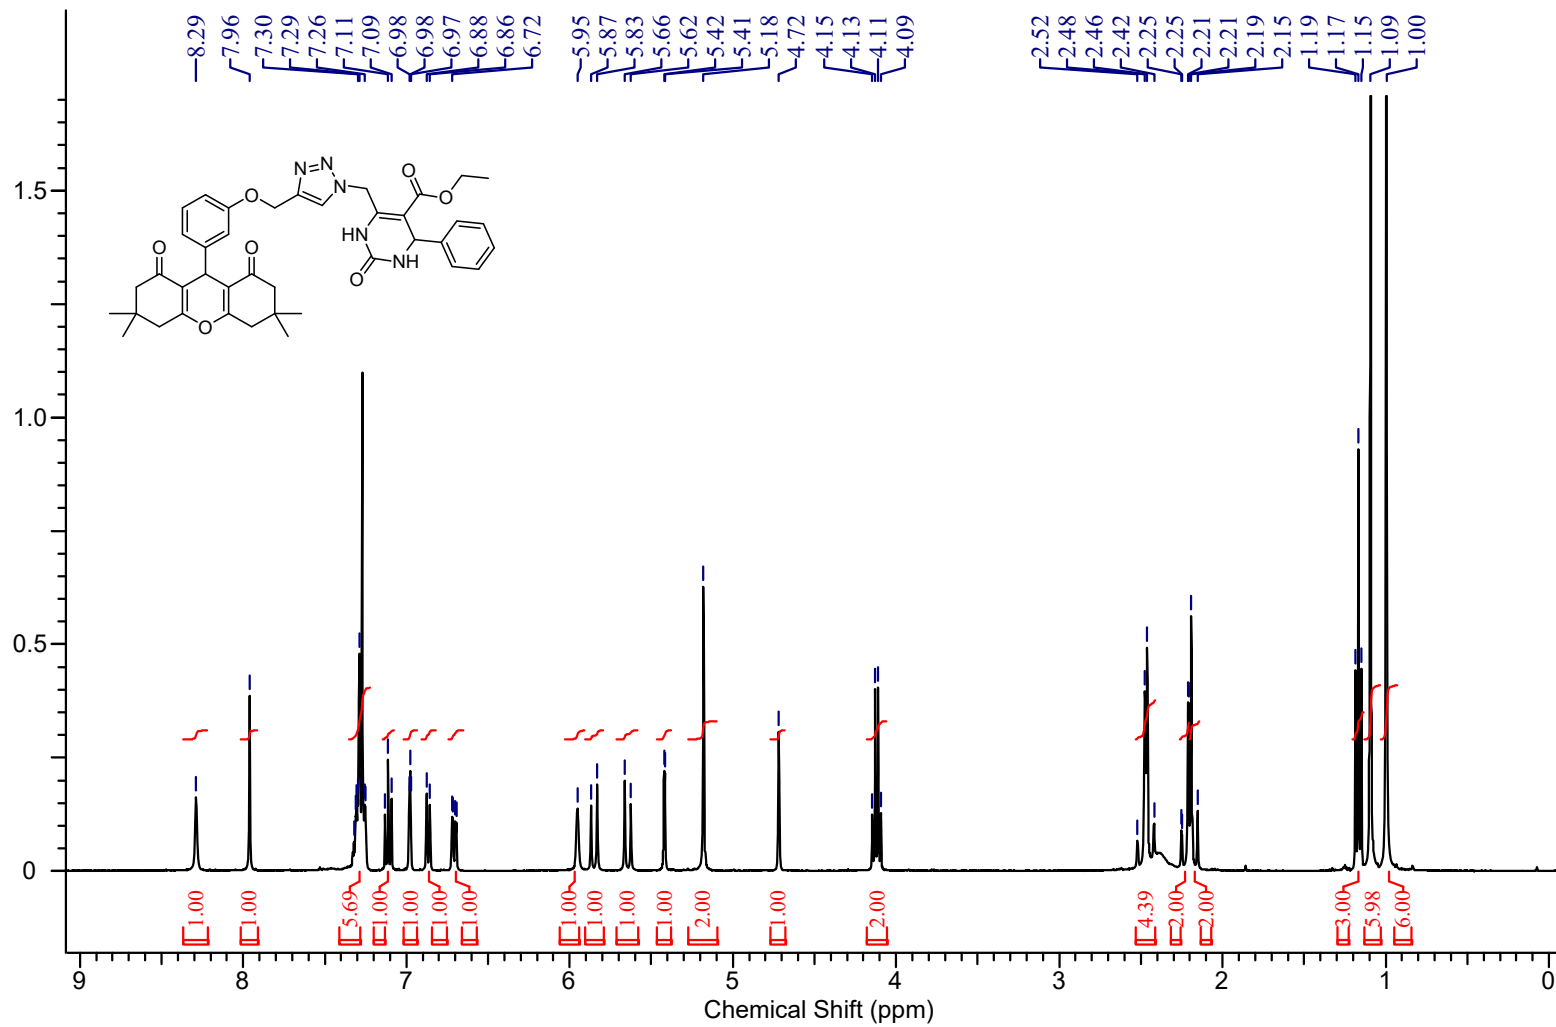

Figure S63:  $^1\text{H-NMR}$  (400 MHz,  $\text{CDCl}_3$ ) of 15I.



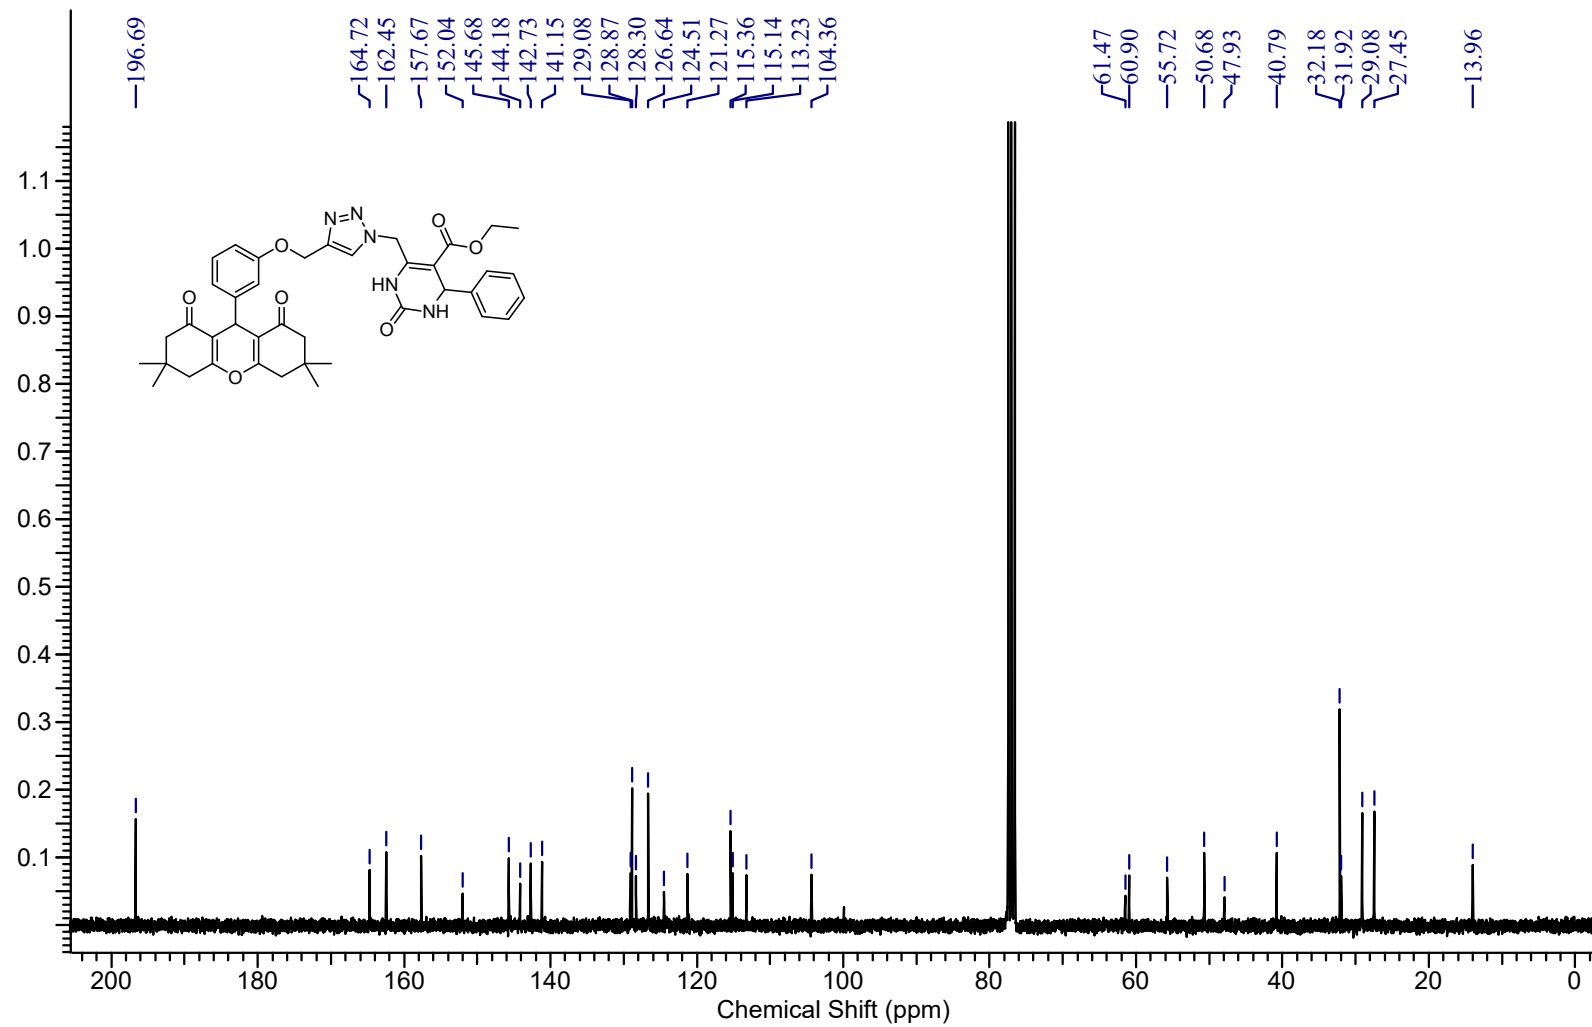

Figure S64: <sup>13</sup>C-NMR (100 MHz, CDCl<sub>3</sub>) of 15l.

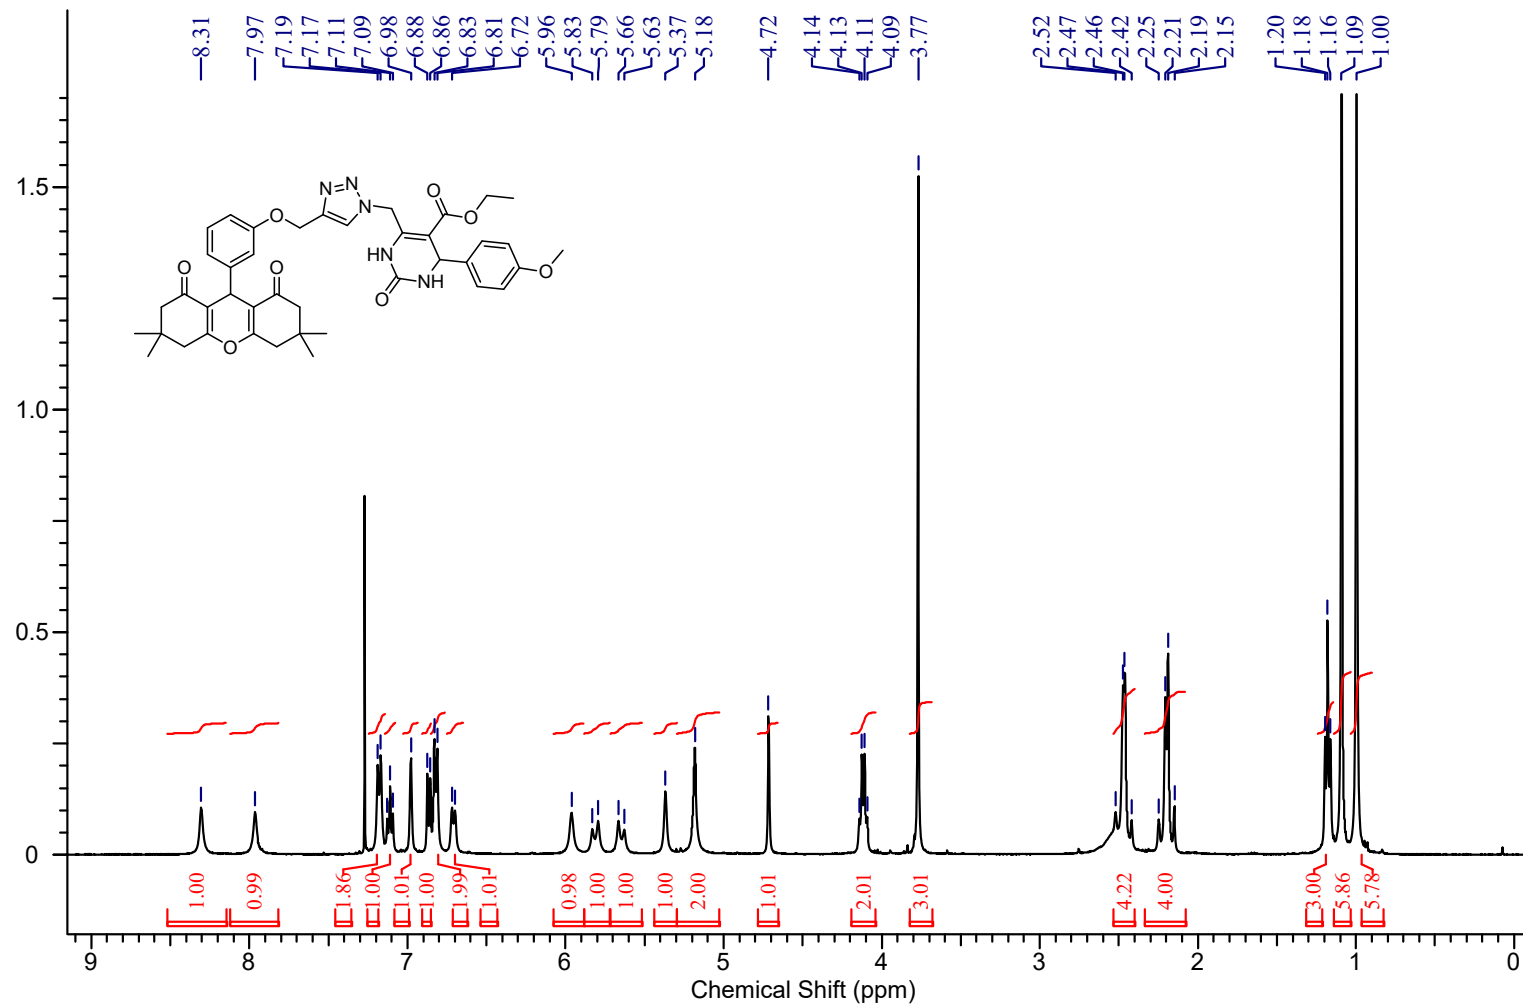

Figure S65:  $^1\text{H-NMR}$  (400 MHz,  $\text{CDCl}_3$ ) of 15m.

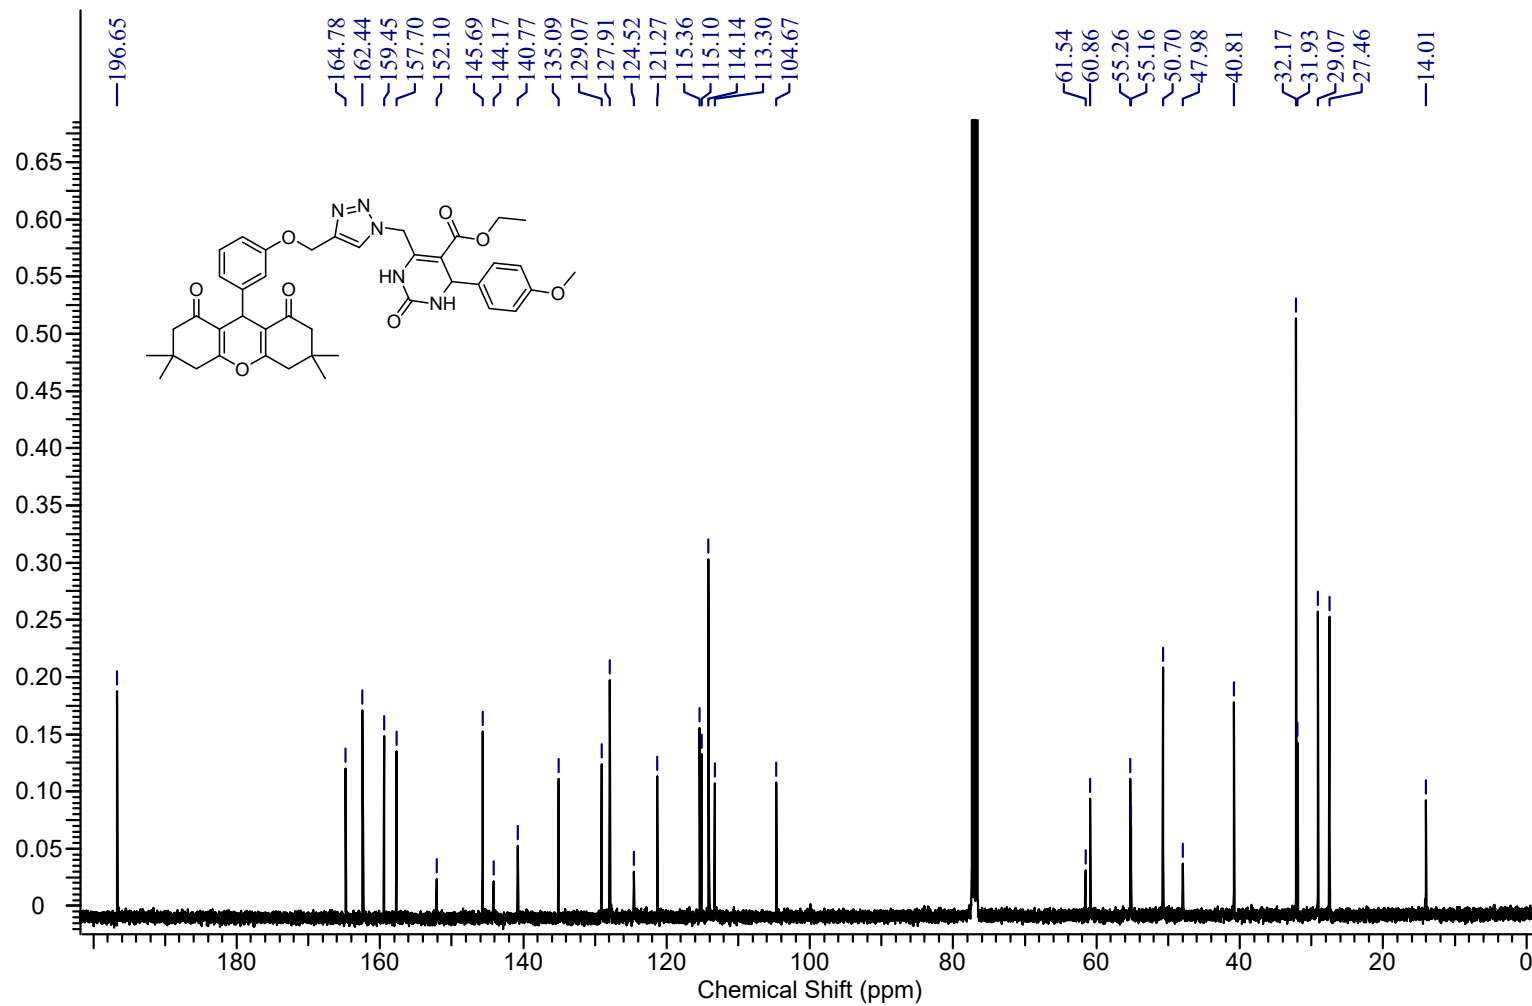

Figure S66:  $^{13}\text{C}$ -NMR (100 MHz,  $\text{CDCl}_3$ ) of 15m.

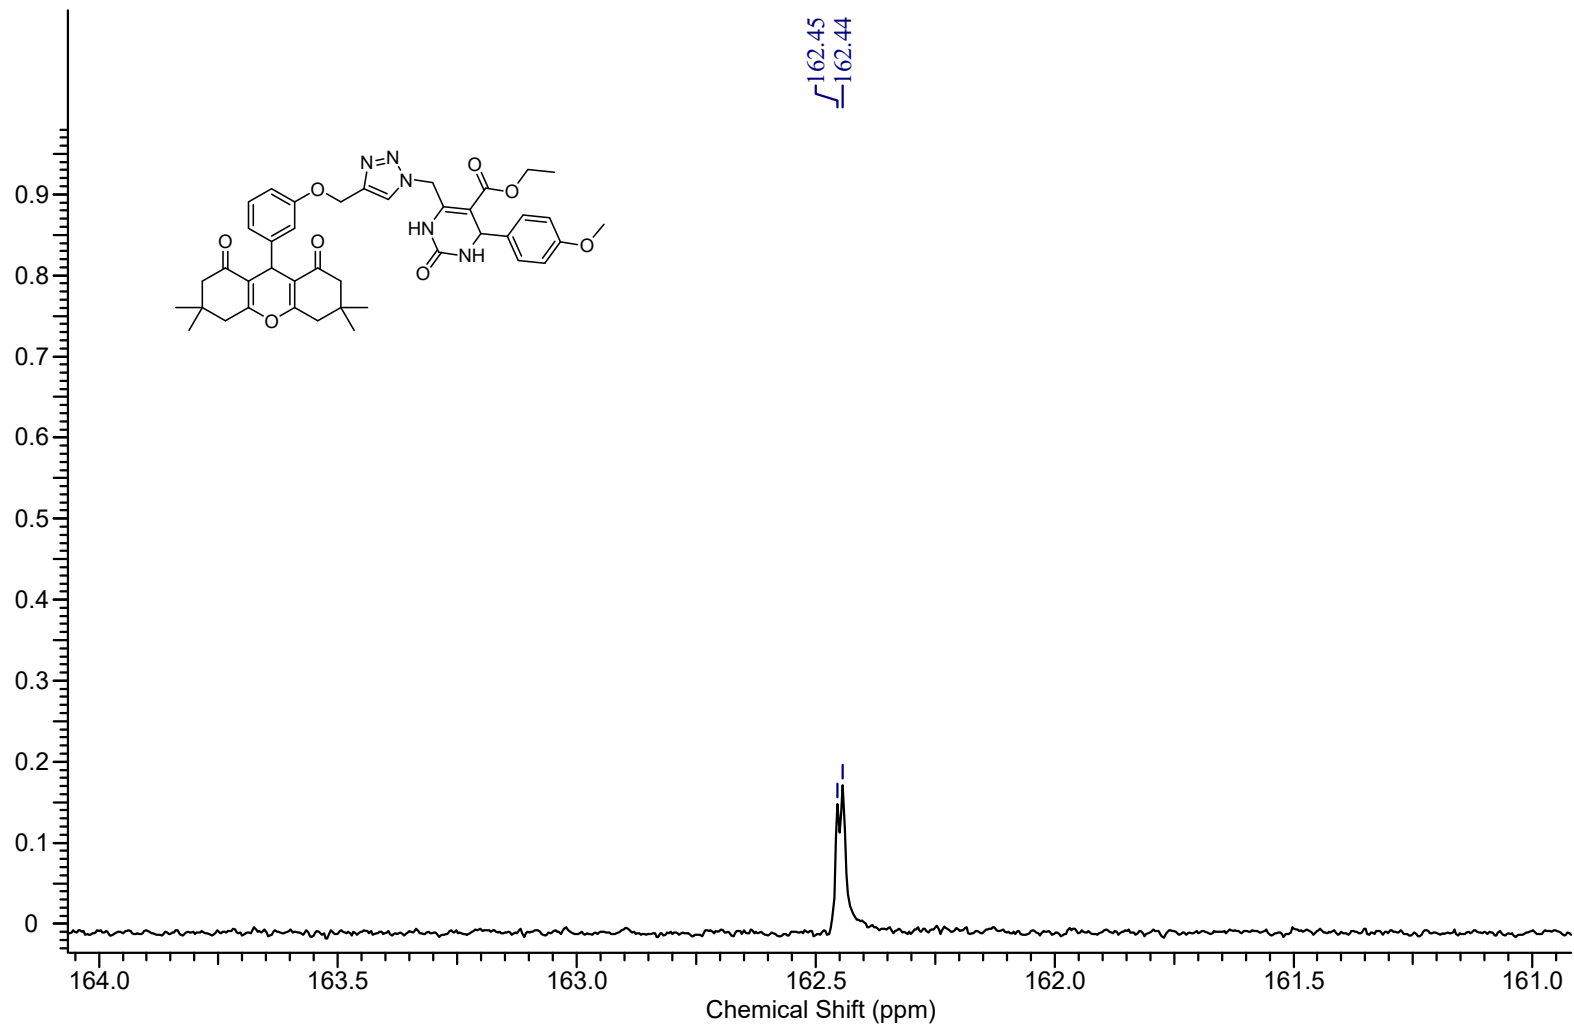

Figure S67: <sup>13</sup>C-NMR (100 MHz, CDCl<sub>3</sub>) of 15m (161.0 to 164.0 ppm)

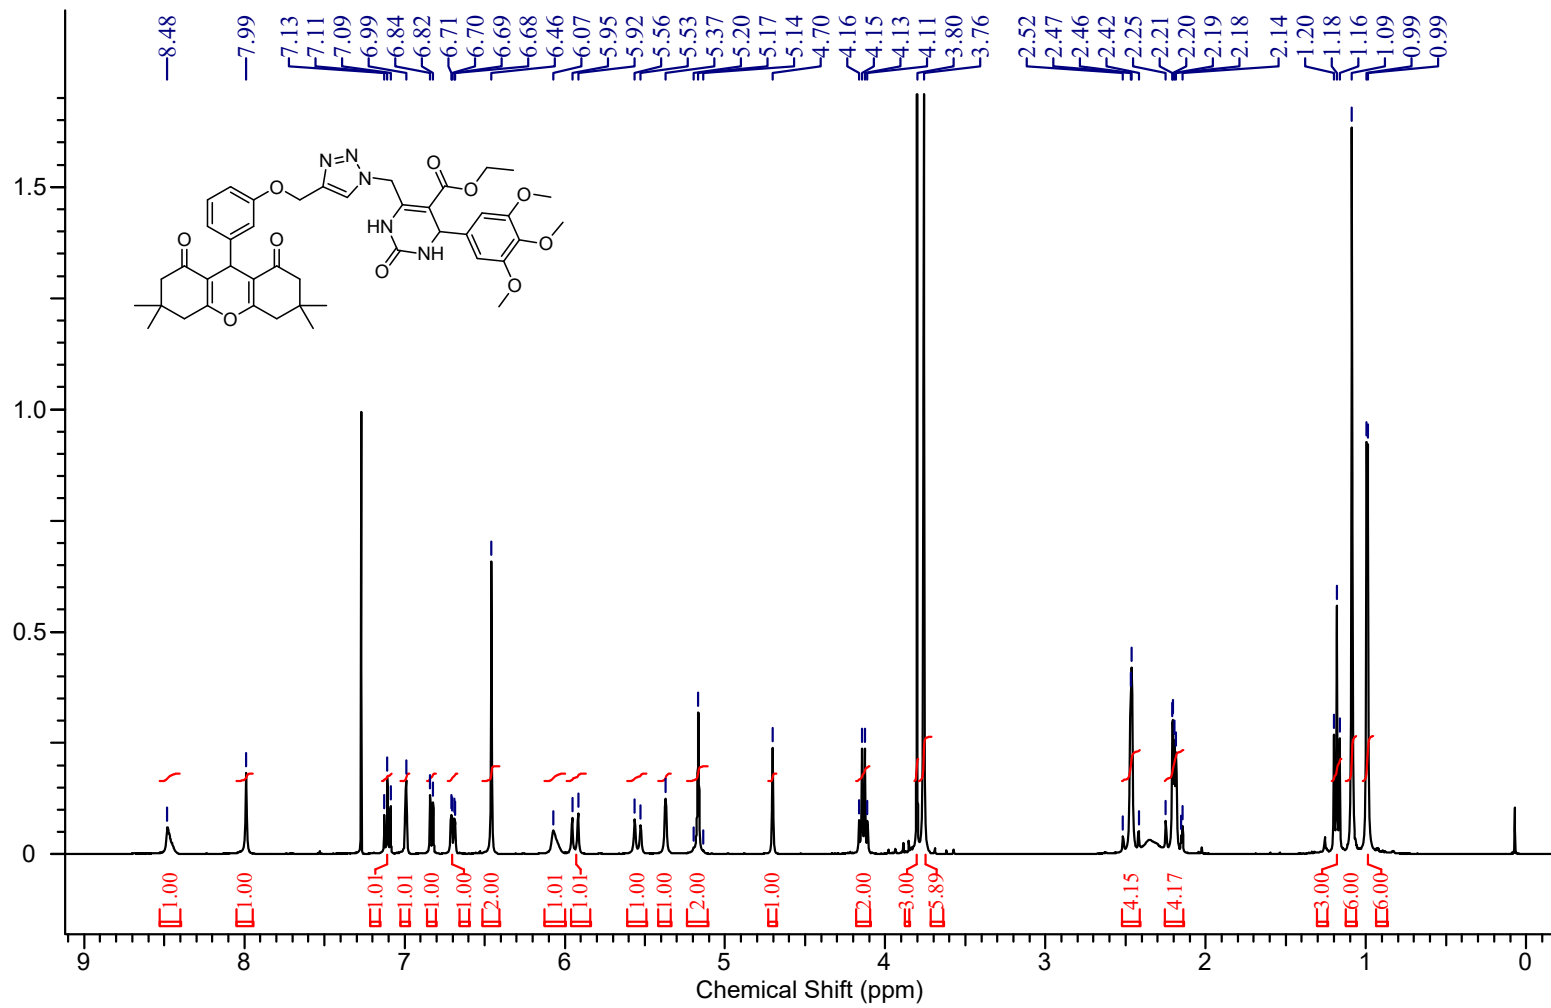

Figure S68:  $^1\text{H-NMR}$  (400 MHz,  $\text{CDCl}_3$ ) of 15n.

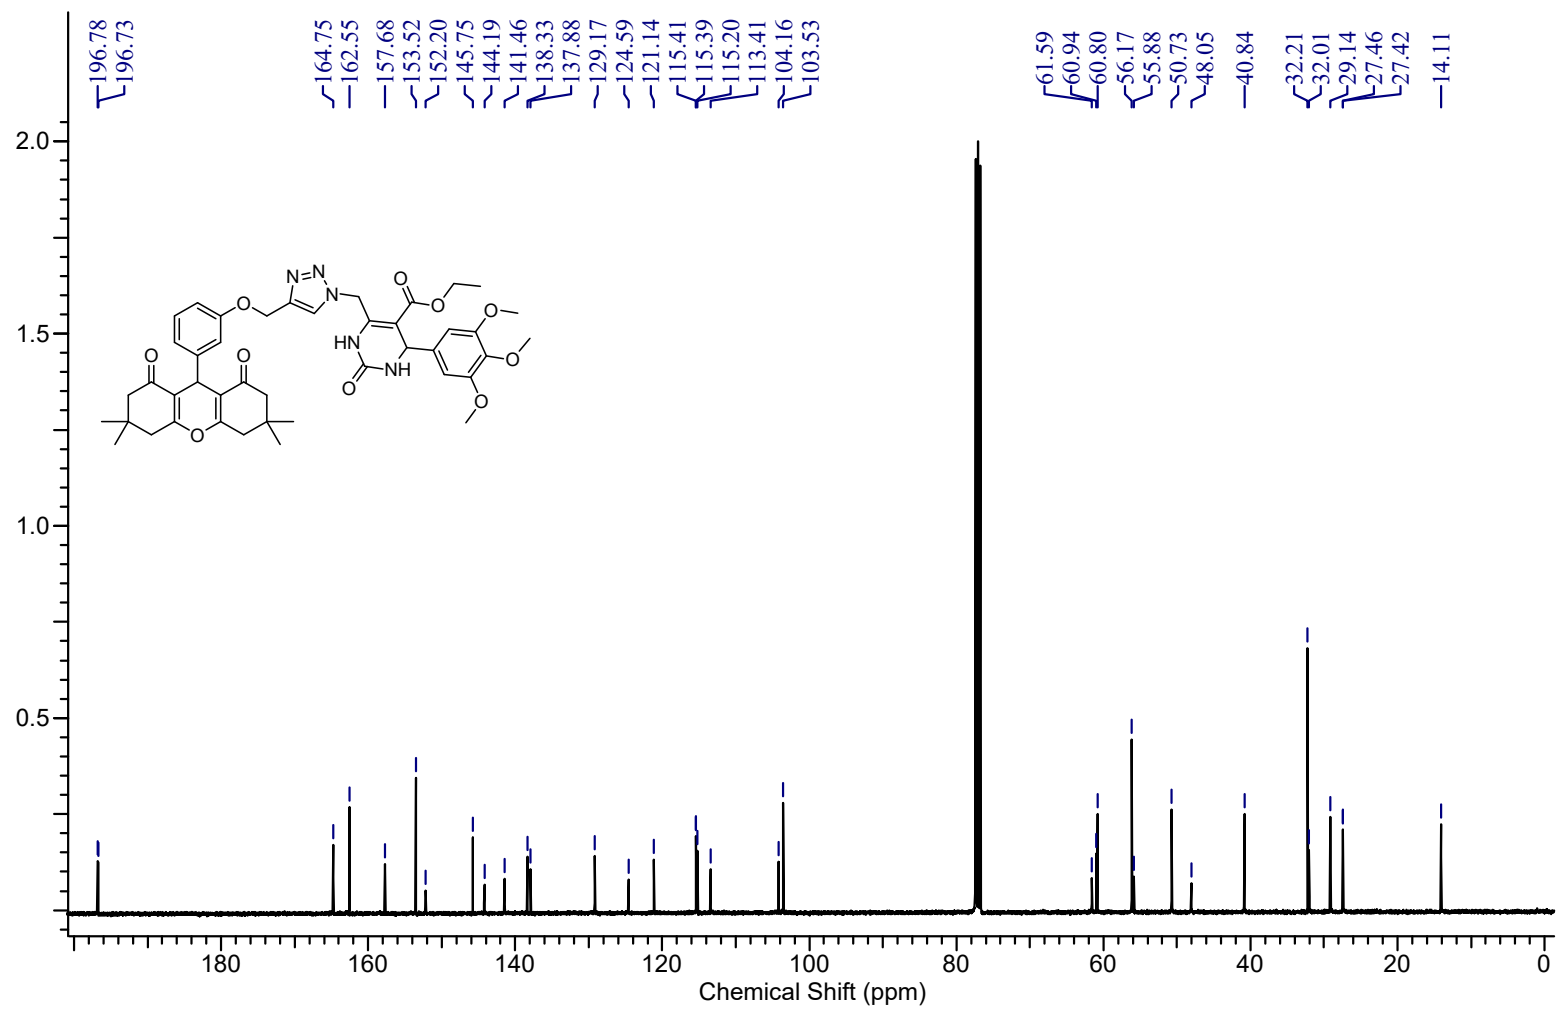

Figure S69:  $^{13}\text{C}$ -NMR (100 MHz,  $\text{CDCl}_3$ ) of 15n.

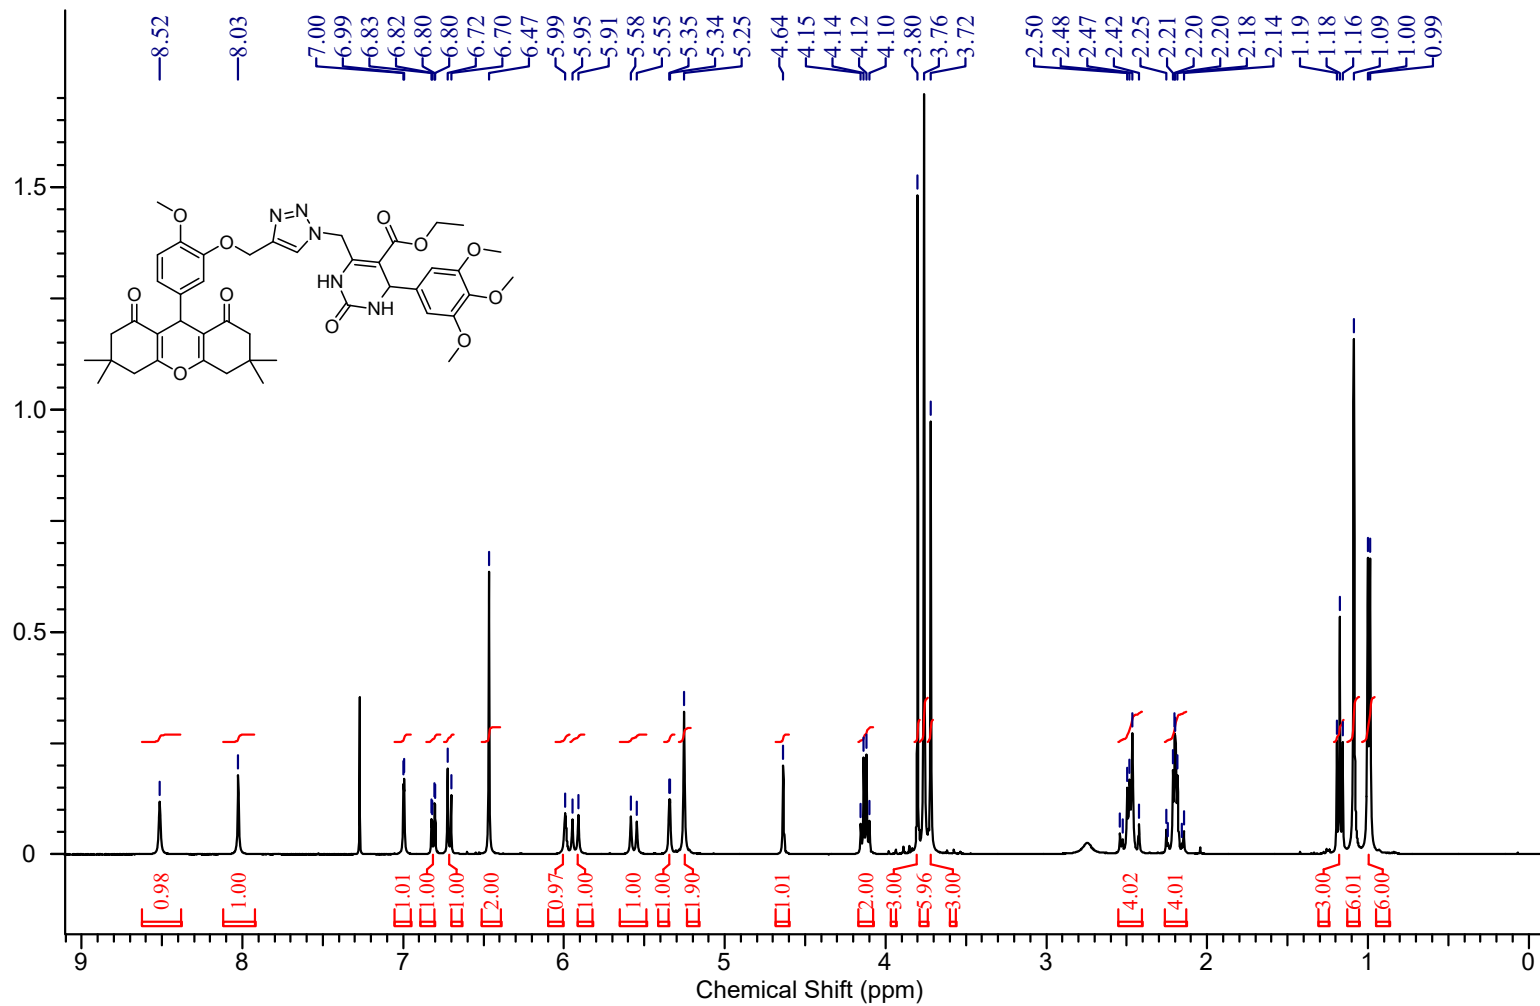

Figure S70: <sup>1</sup>H-NMR (400 MHz, CDCl<sub>3</sub>) of 15o.

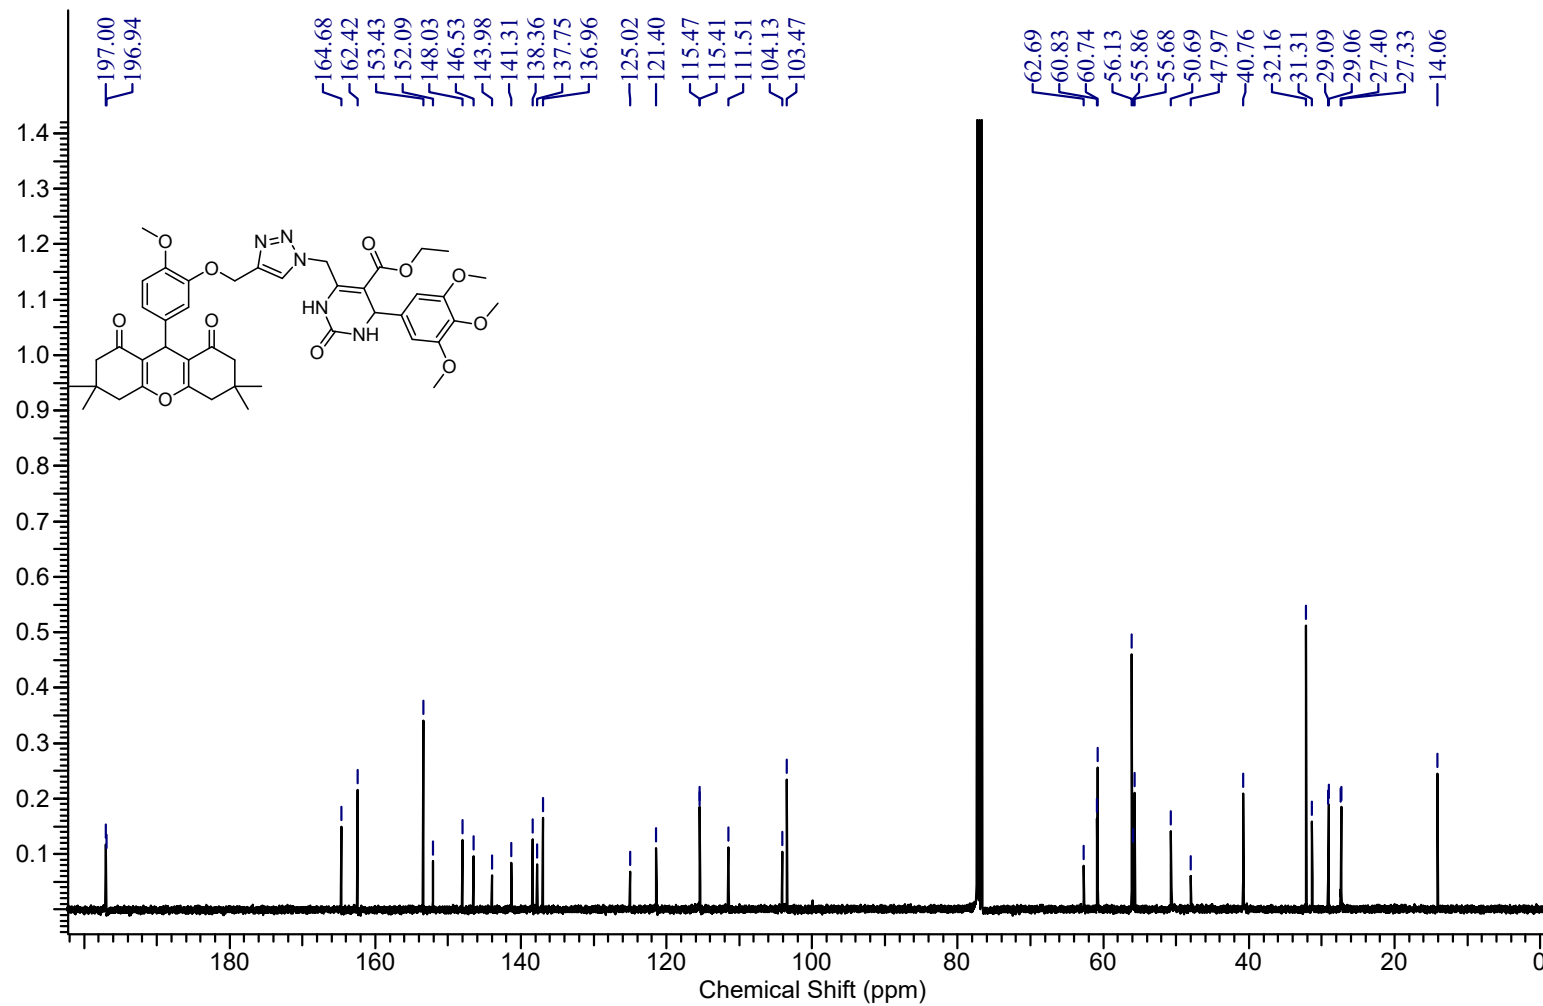

Figure S71:  $^{13}\text{C}$ -NMR (100 MHz,  $\text{CDCl}_3$ ) of 15o.



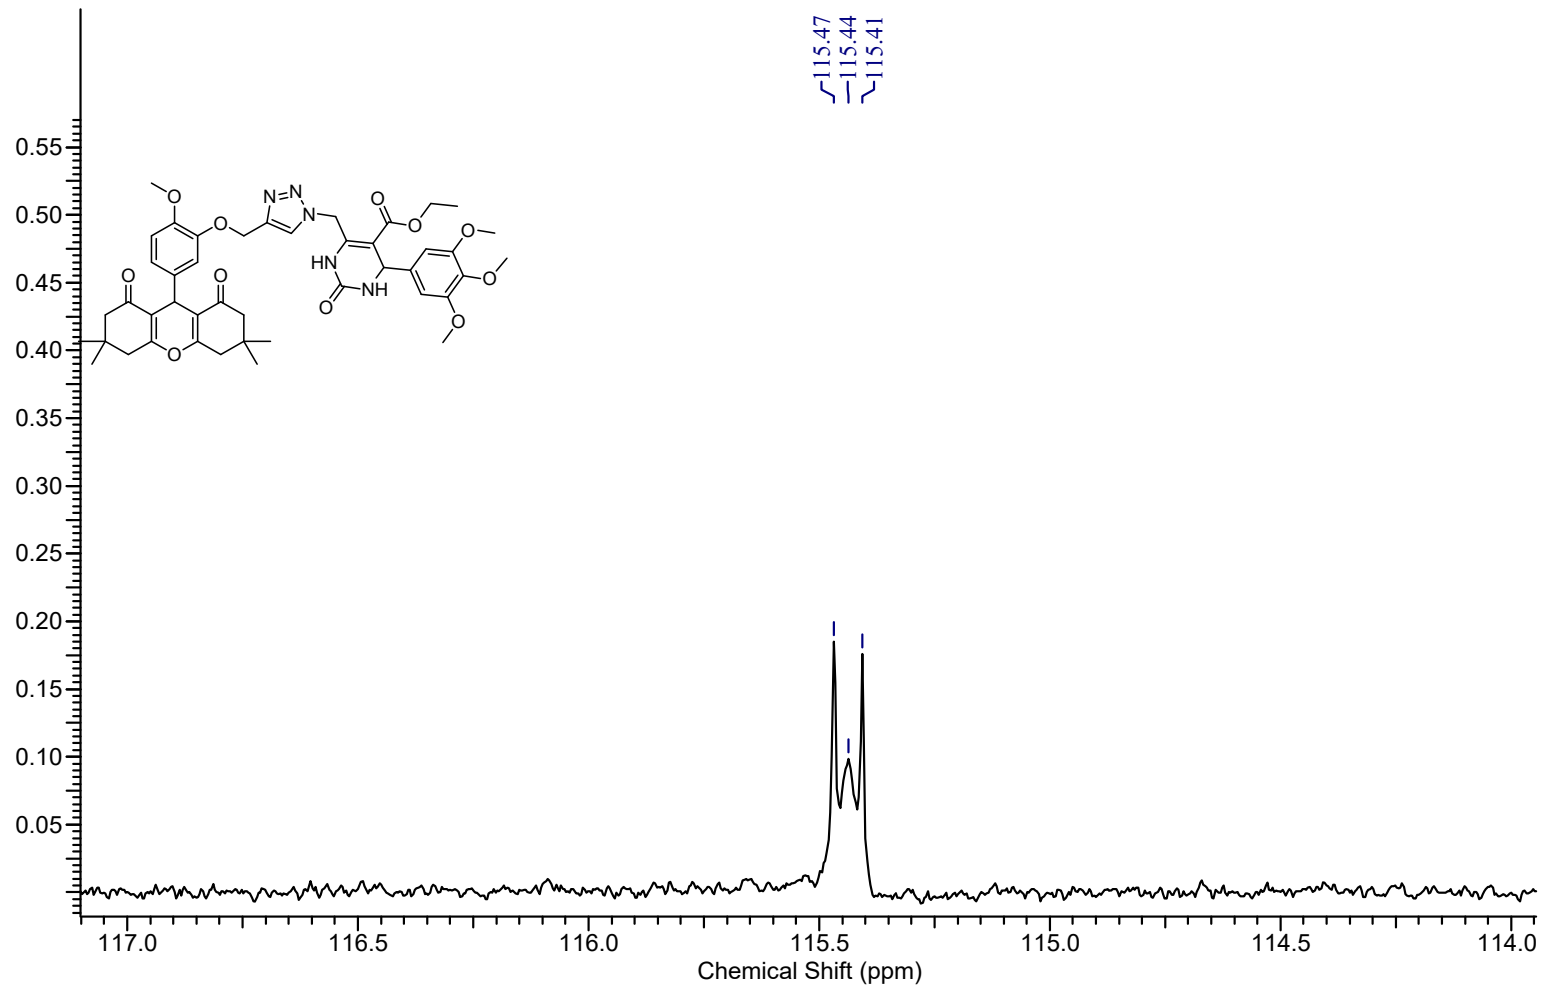

Figure S72: <sup>13</sup>C-NMR (100 MHz, CDCl<sub>3</sub>) of 15o (114.0 to 117.0 ppm).

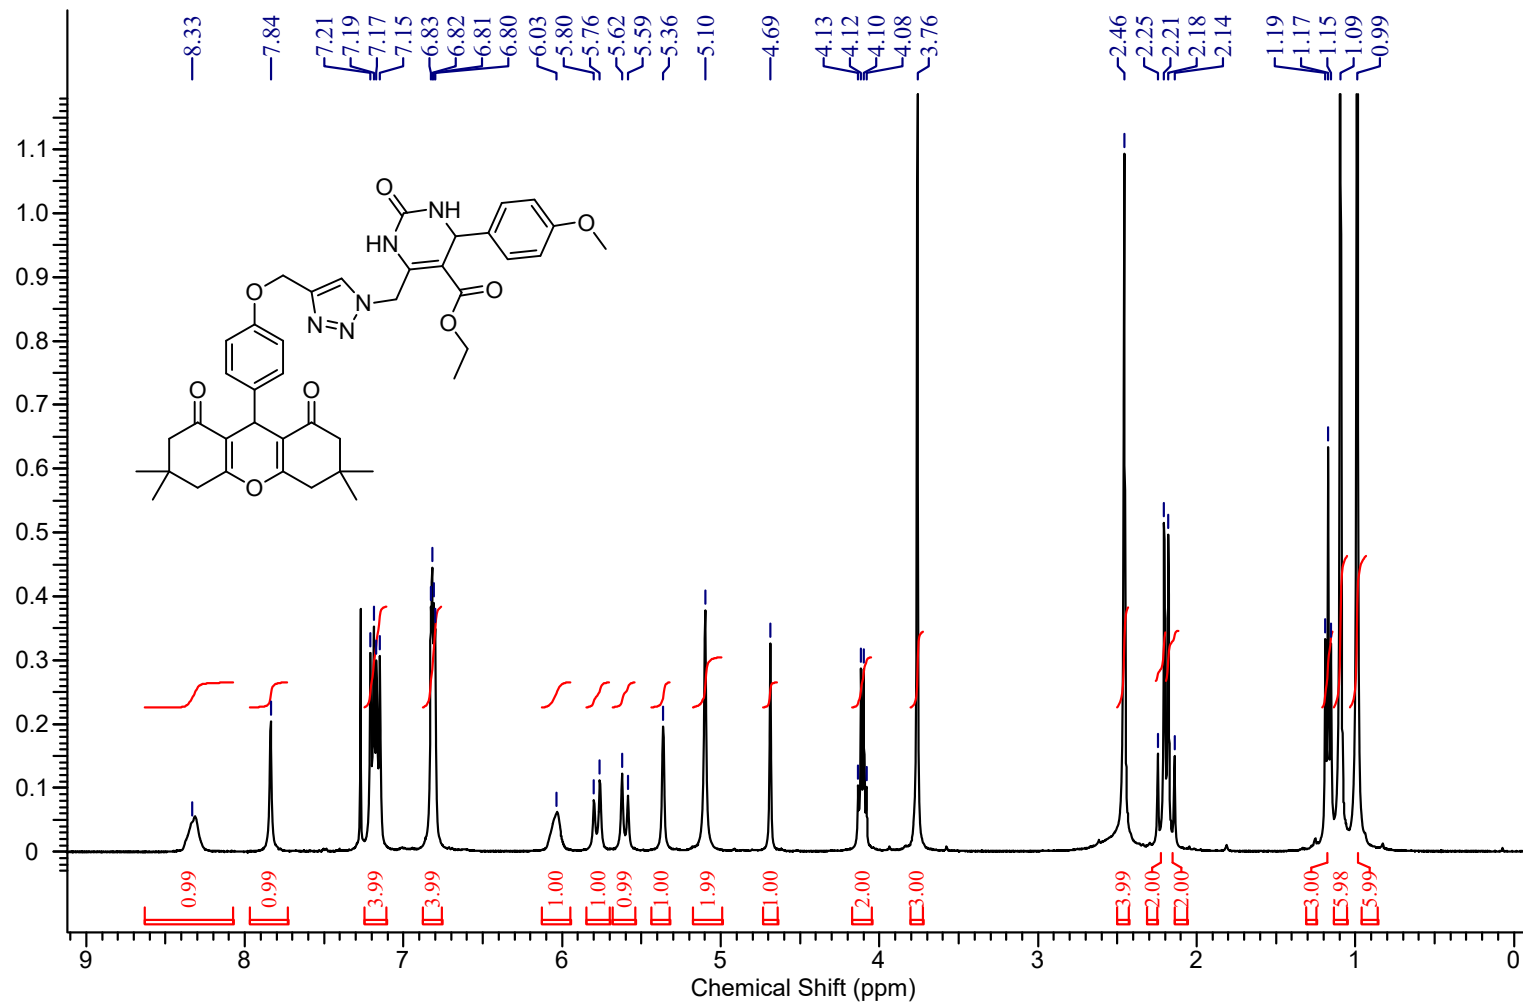

Figure S73: <sup>1</sup>H-NMR (400 MHz, CDCl<sub>3</sub>) of 15p.

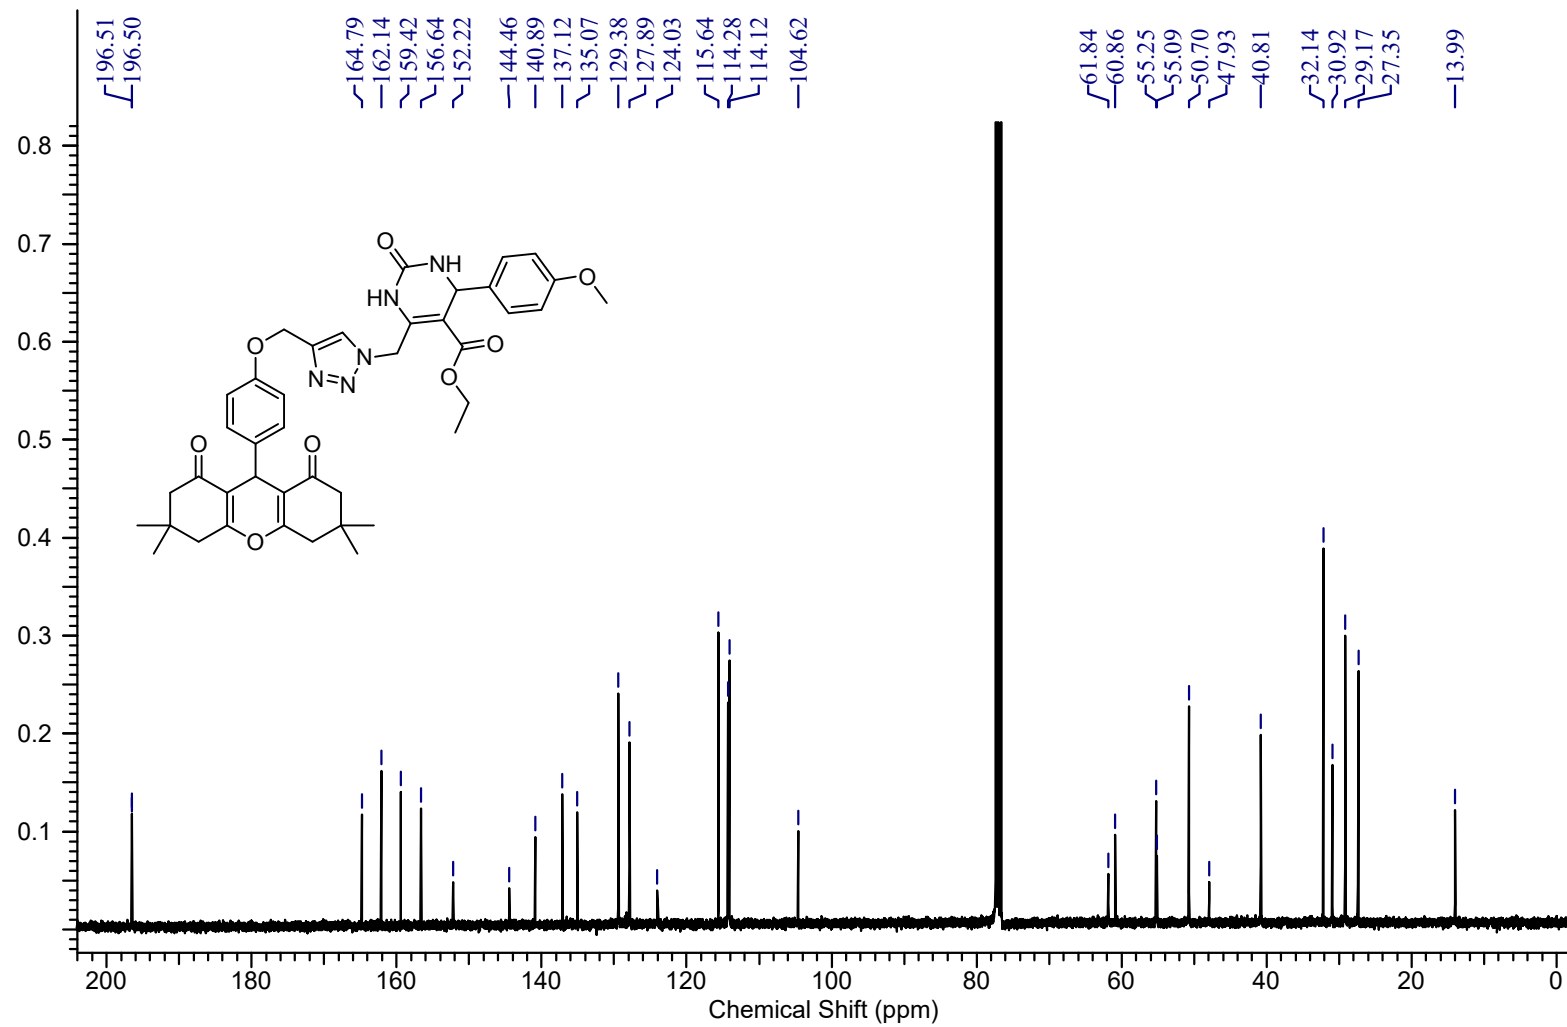

Figure S74:  $^{13}\text{C}$ -NMR (100 MHz,  $\text{CDCl}_3$ ) of 15p.

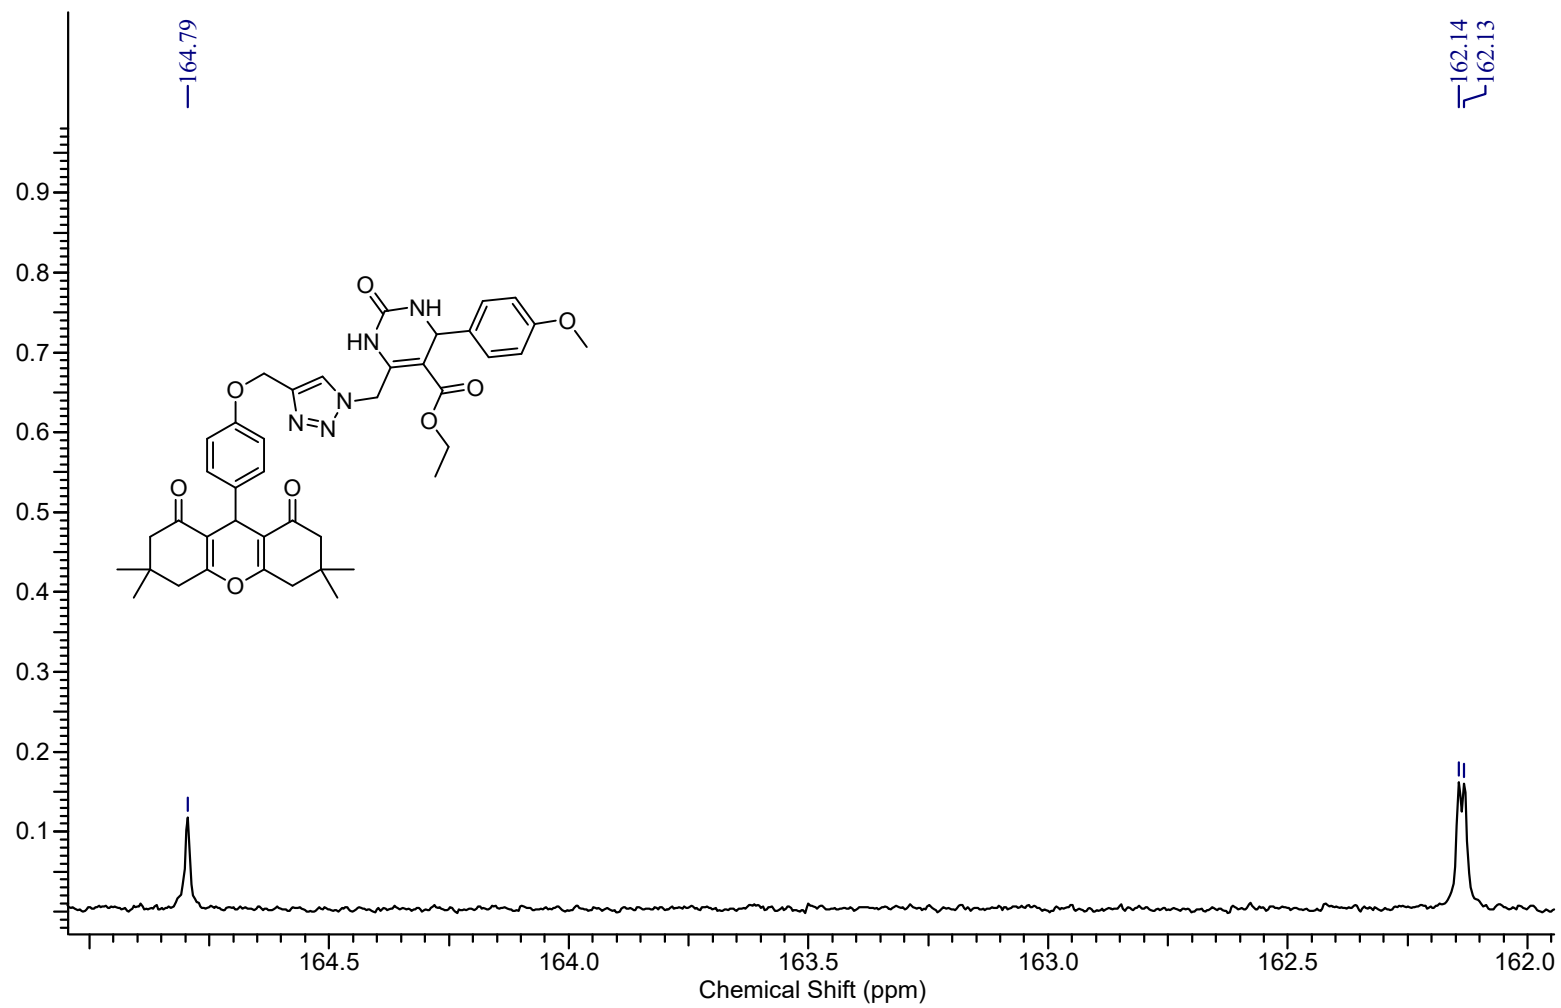

Figure S75: <sup>13</sup>C-NMR (100 MHz, CDCl<sub>3</sub>) of 15o (162.0 to 165.0 ppm).

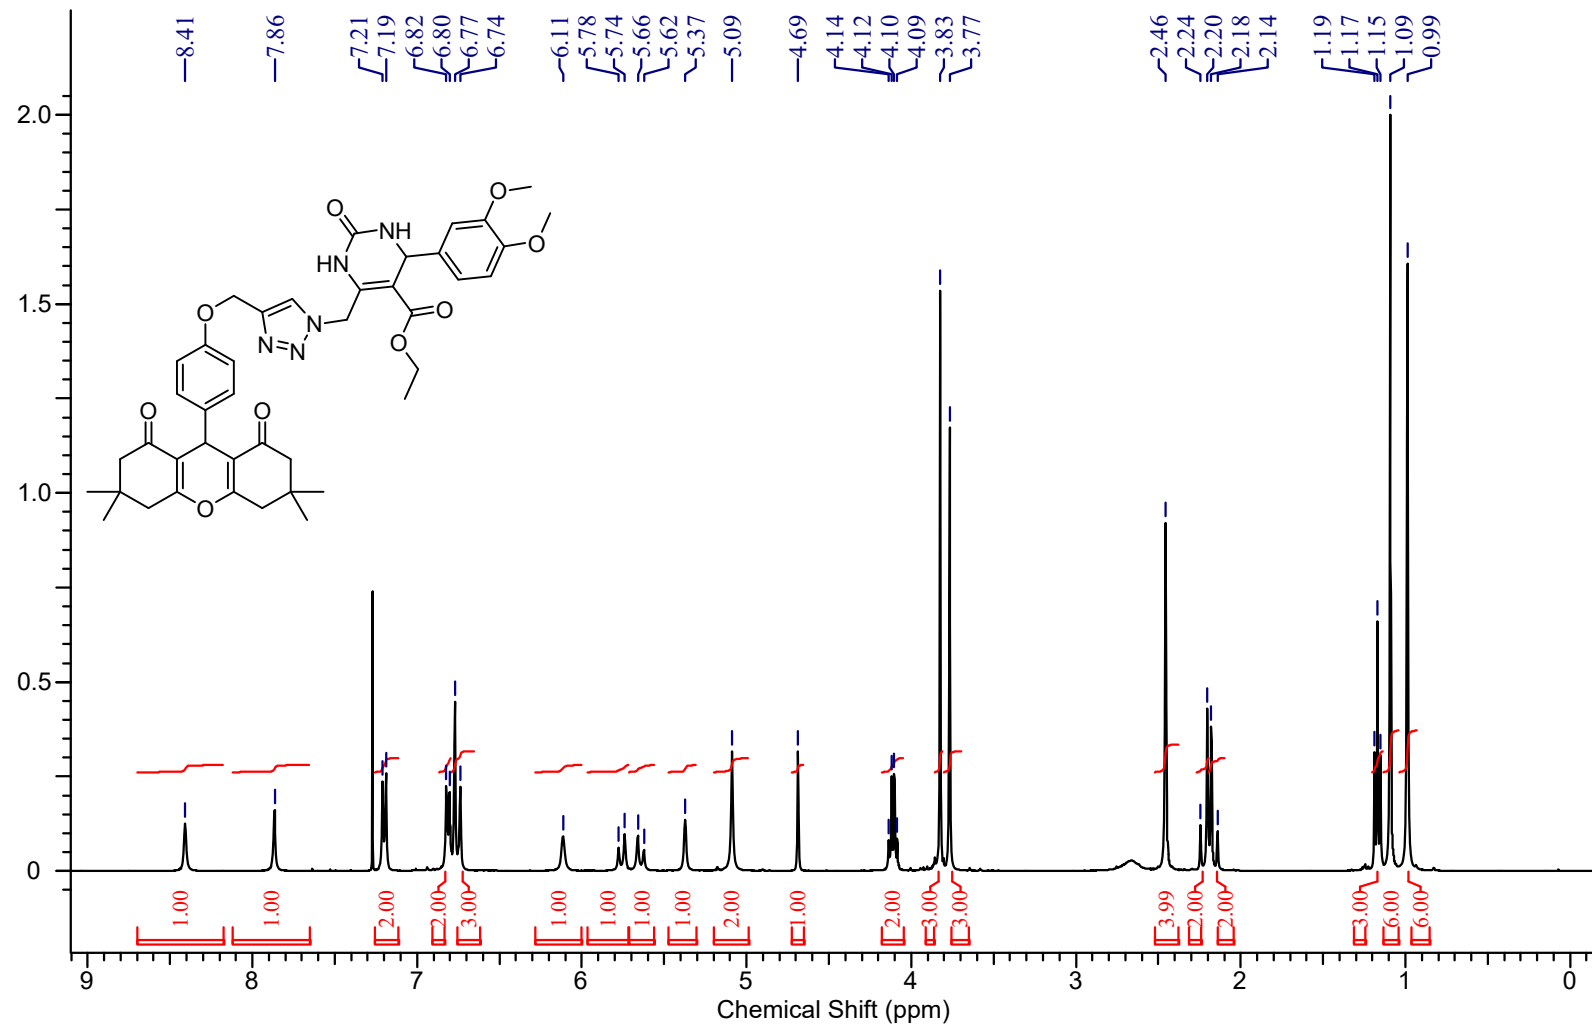

Figure S76: <sup>1</sup>H-NMR (400 MHz, CDCl<sub>3</sub>) of 15q.

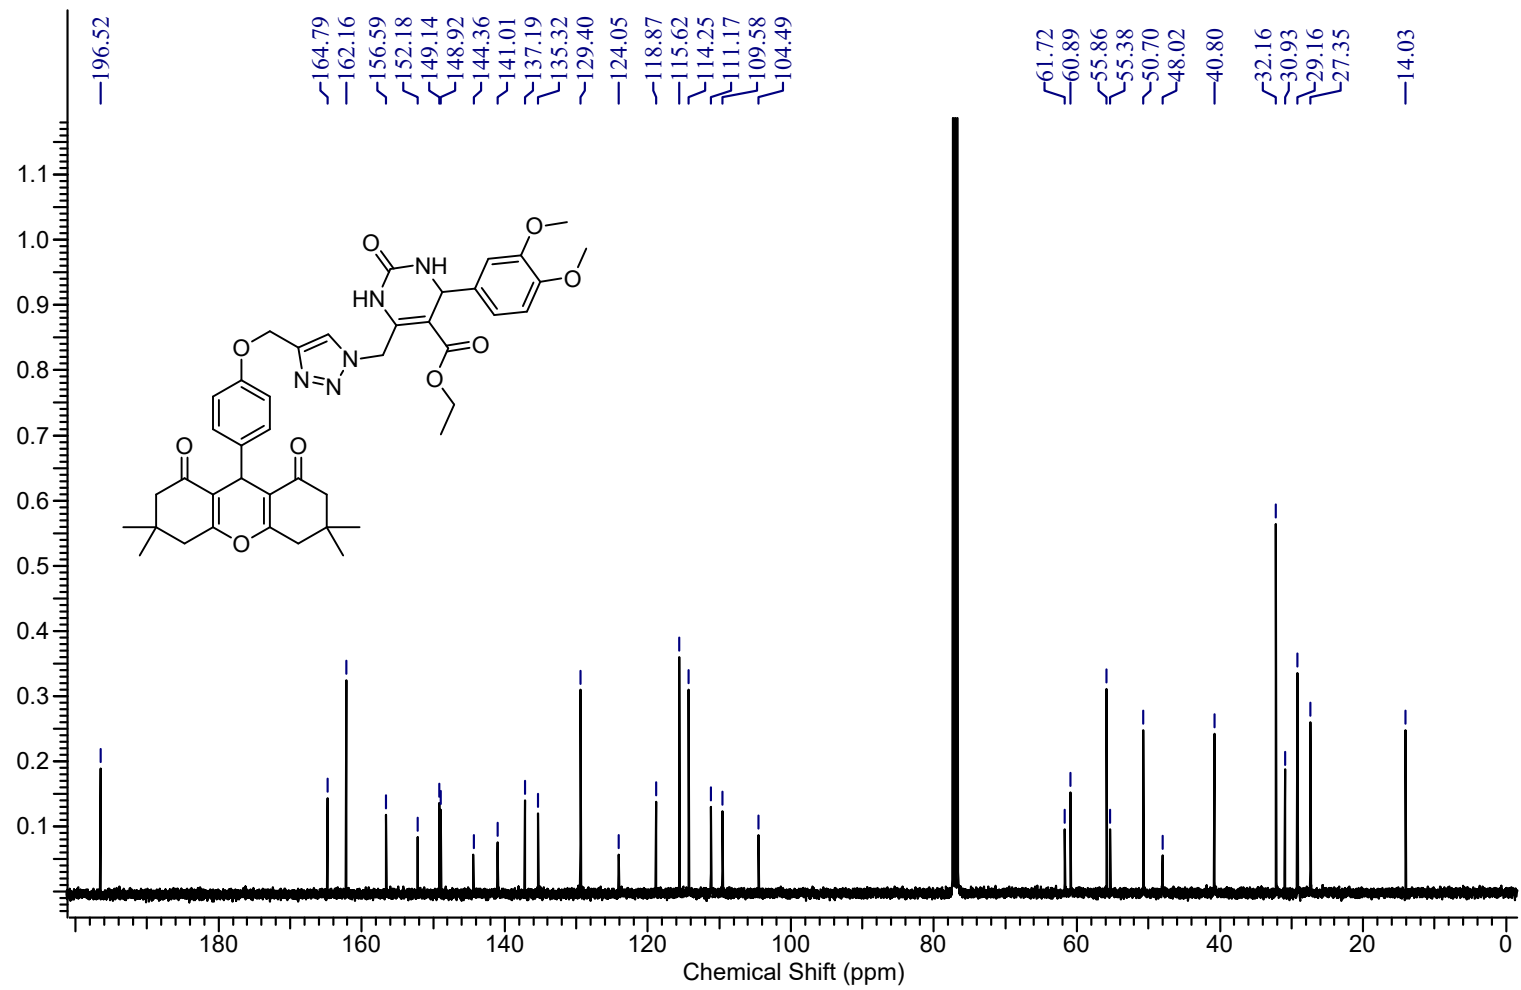

Figure S77:  $^{13}\text{C}$ -NMR (100 MHz,  $\text{CDCl}_3$ ) of 15q.

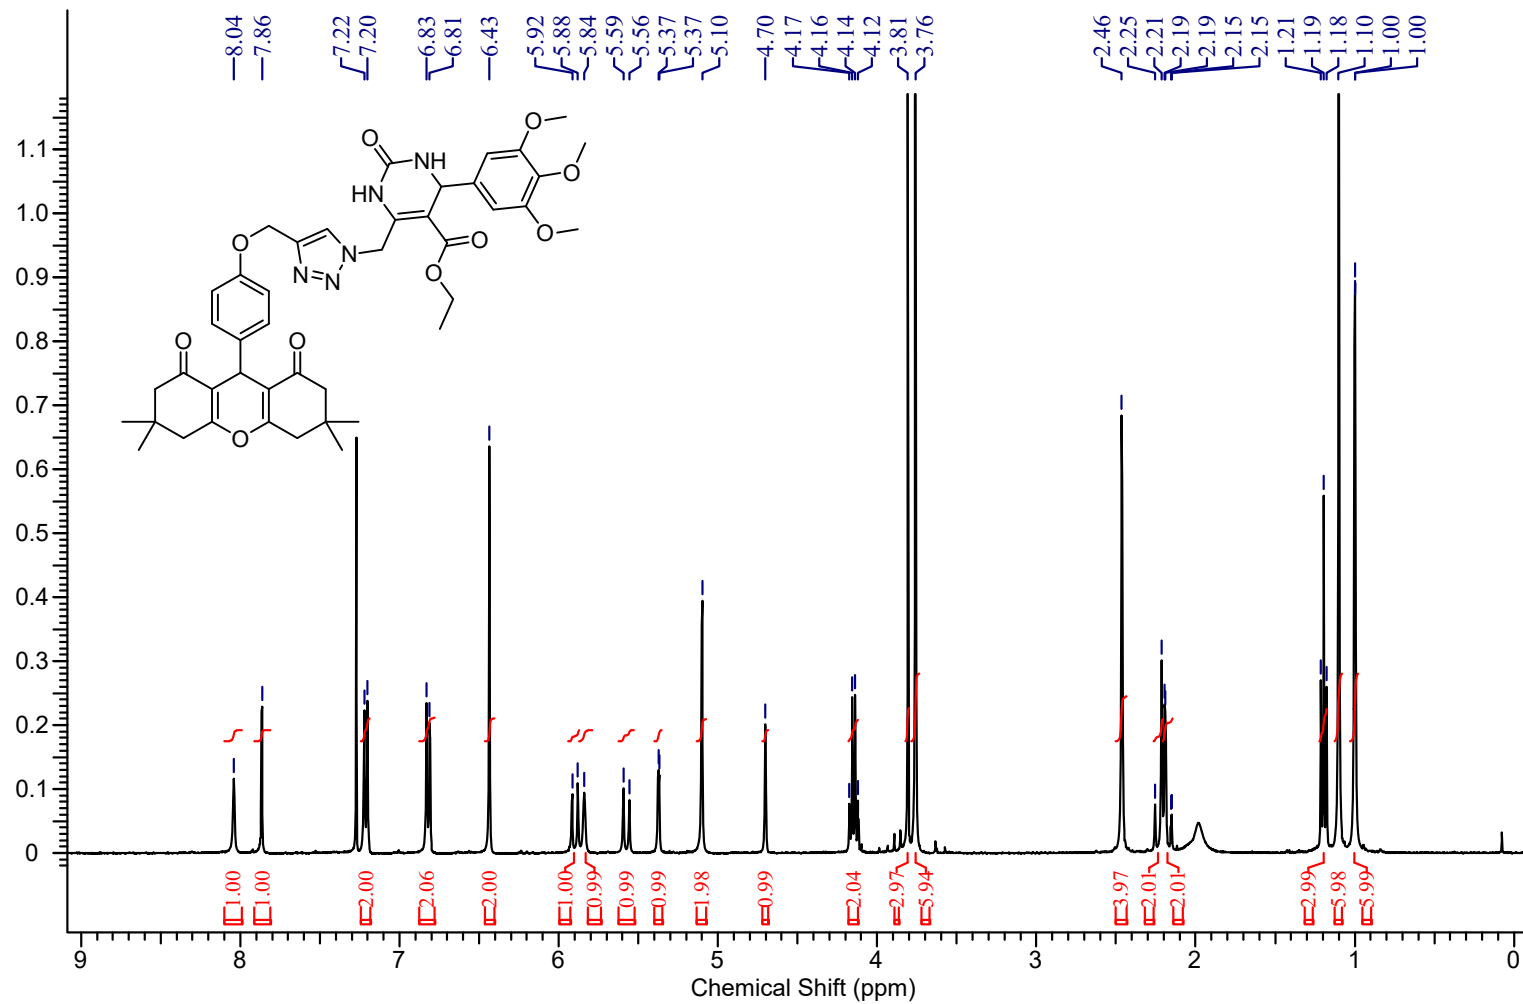

Figure S78: <sup>1</sup>H-NMR (400 MHz, CDCl<sub>3</sub>) of 15r.

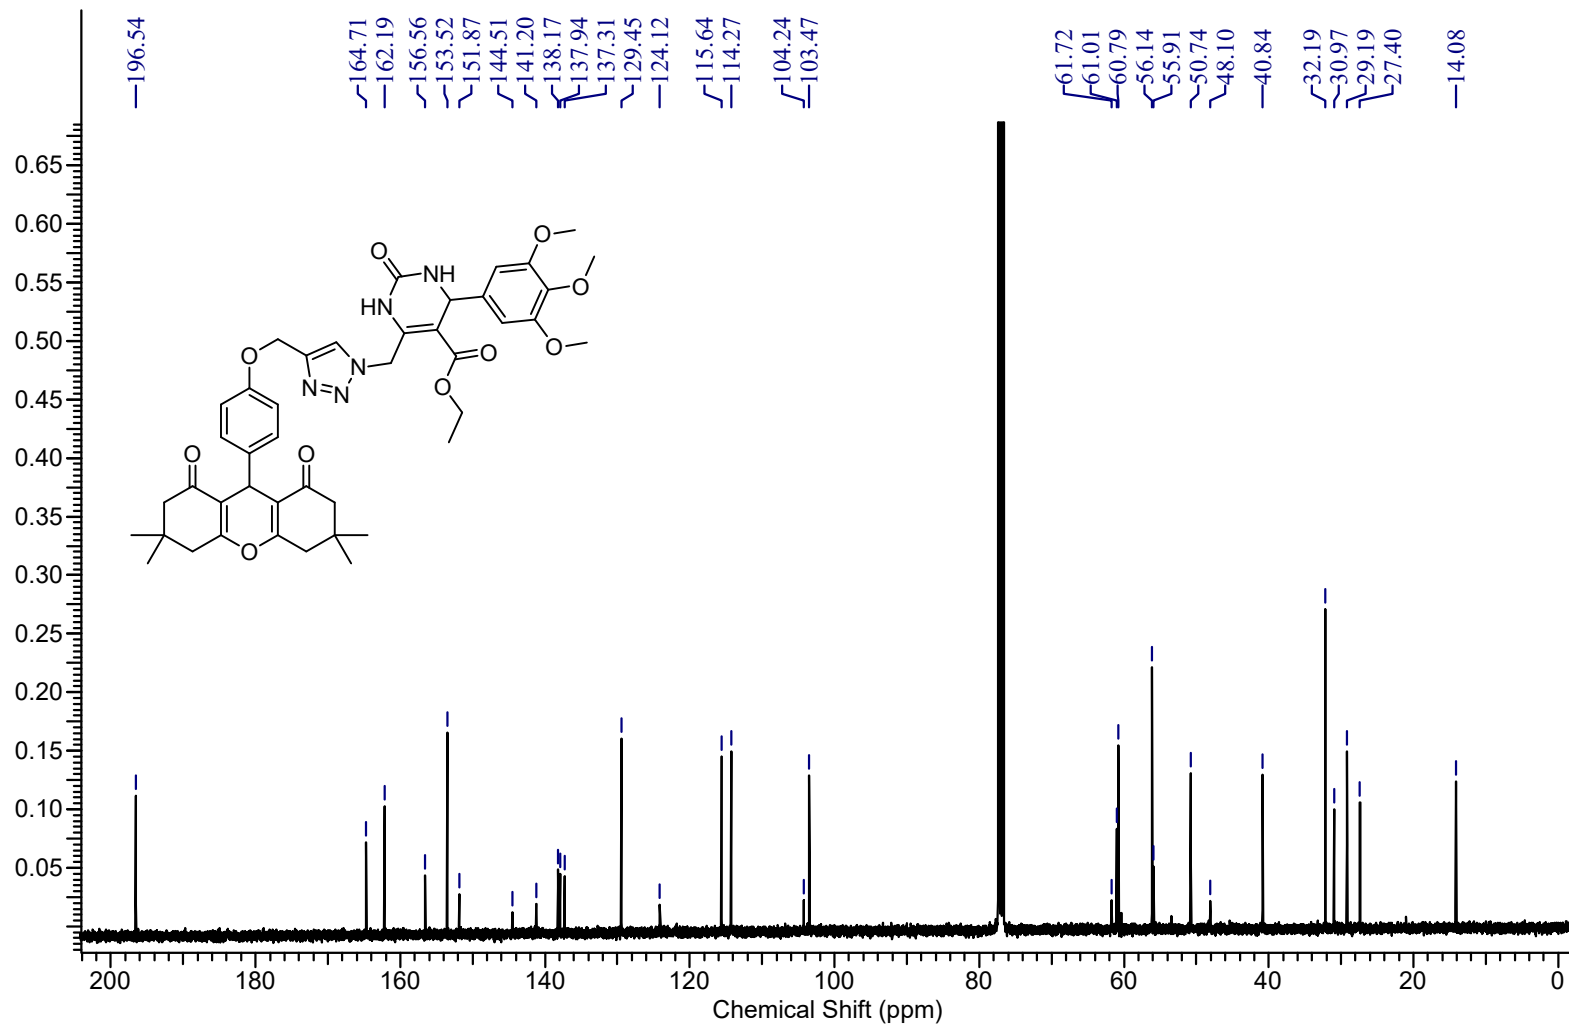

Figure S79:  $^{13}\text{C}$ -NMR (100 MHz,  $\text{CDCl}_3$ ) of 15r.



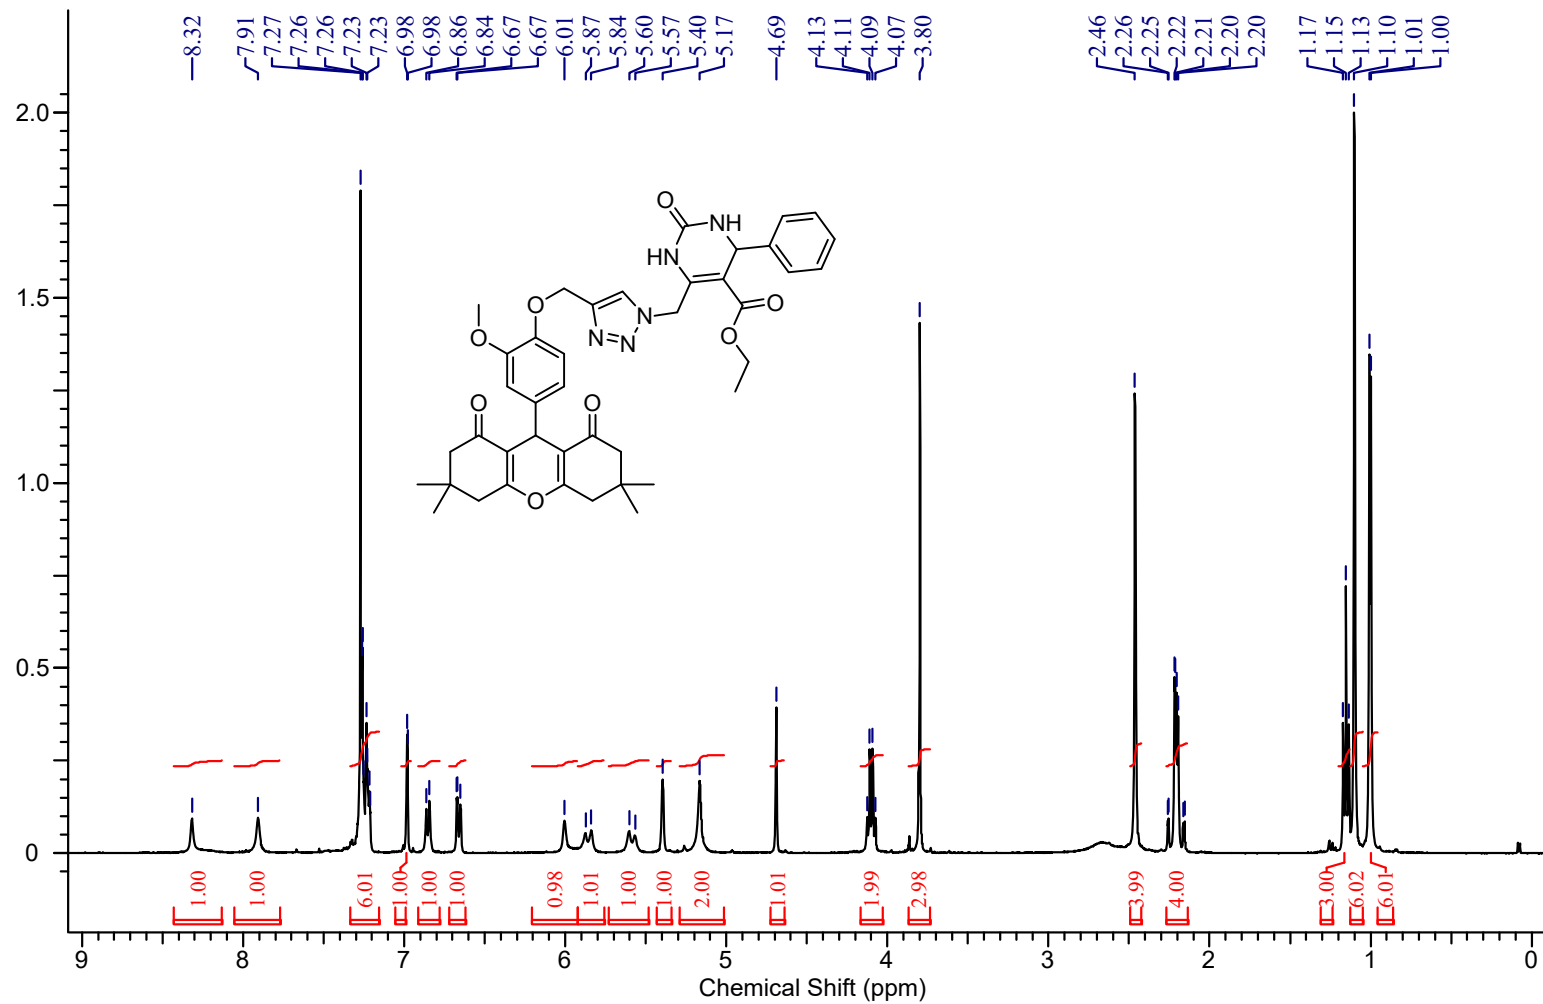

Figure S80:  $^1\text{H-NMR}$  (400 MHz,  $\text{CDCl}_3$ ) of 15s.

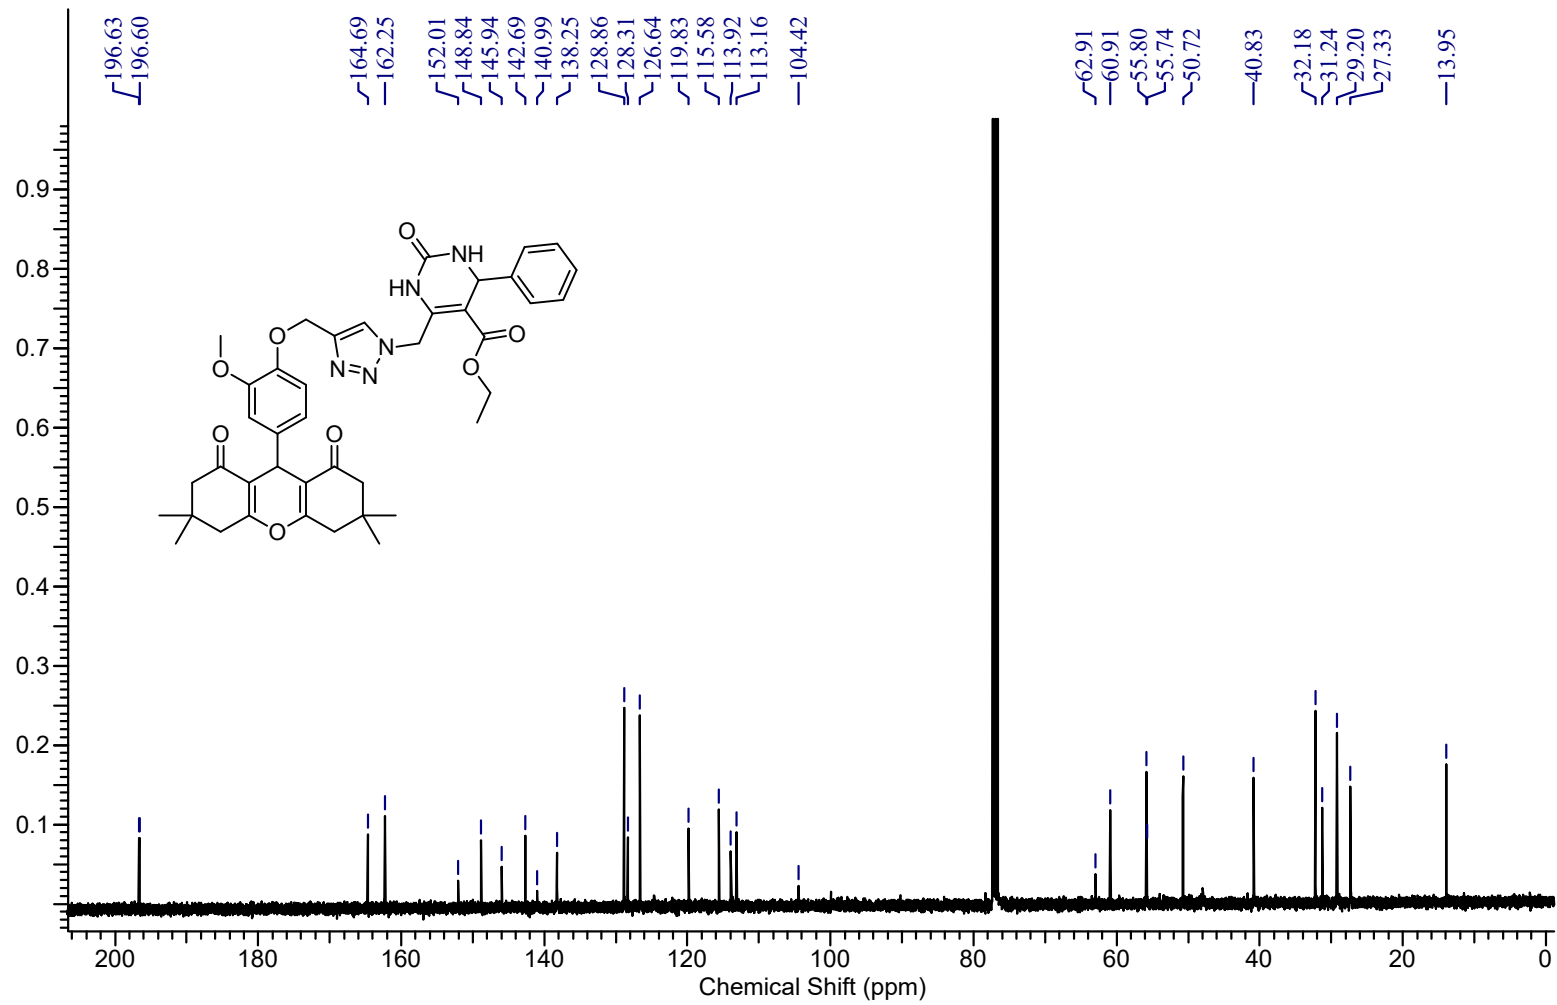

Figure S81:  $^{13}\text{C}$ -NMR (100 MHz,  $\text{CDCl}_3$ ) of 15s.

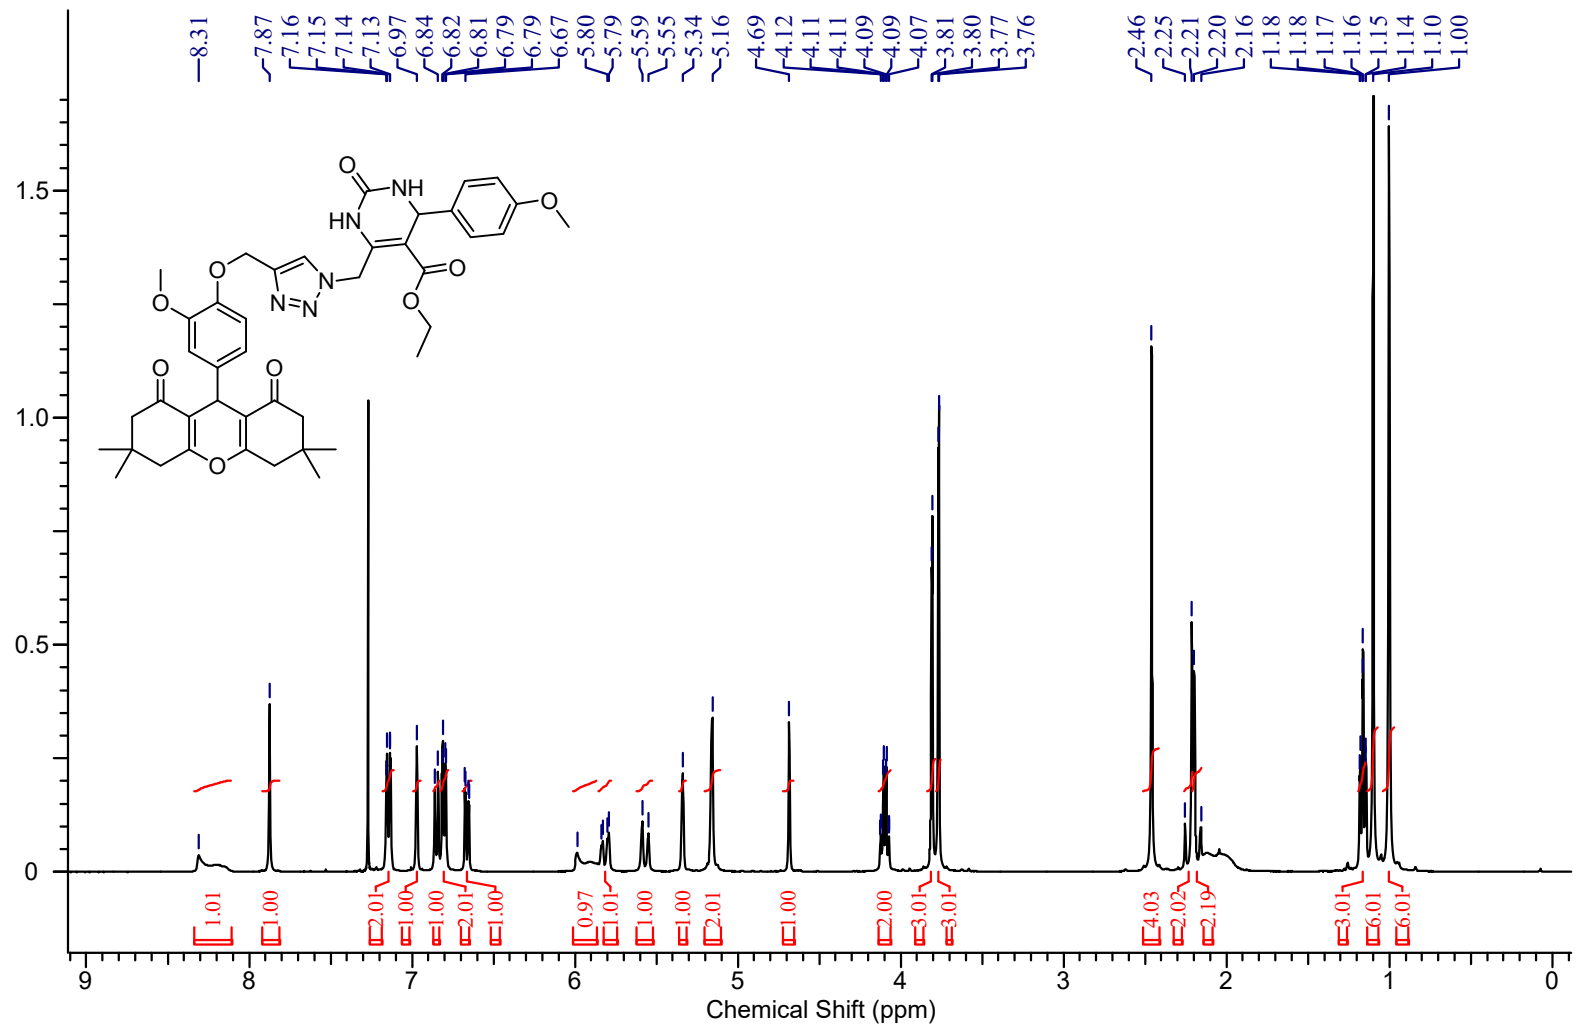

Figure S82:  $^1\text{H-NMR}$  (400 MHz,  $\text{CDCl}_3$ ) of 15t.

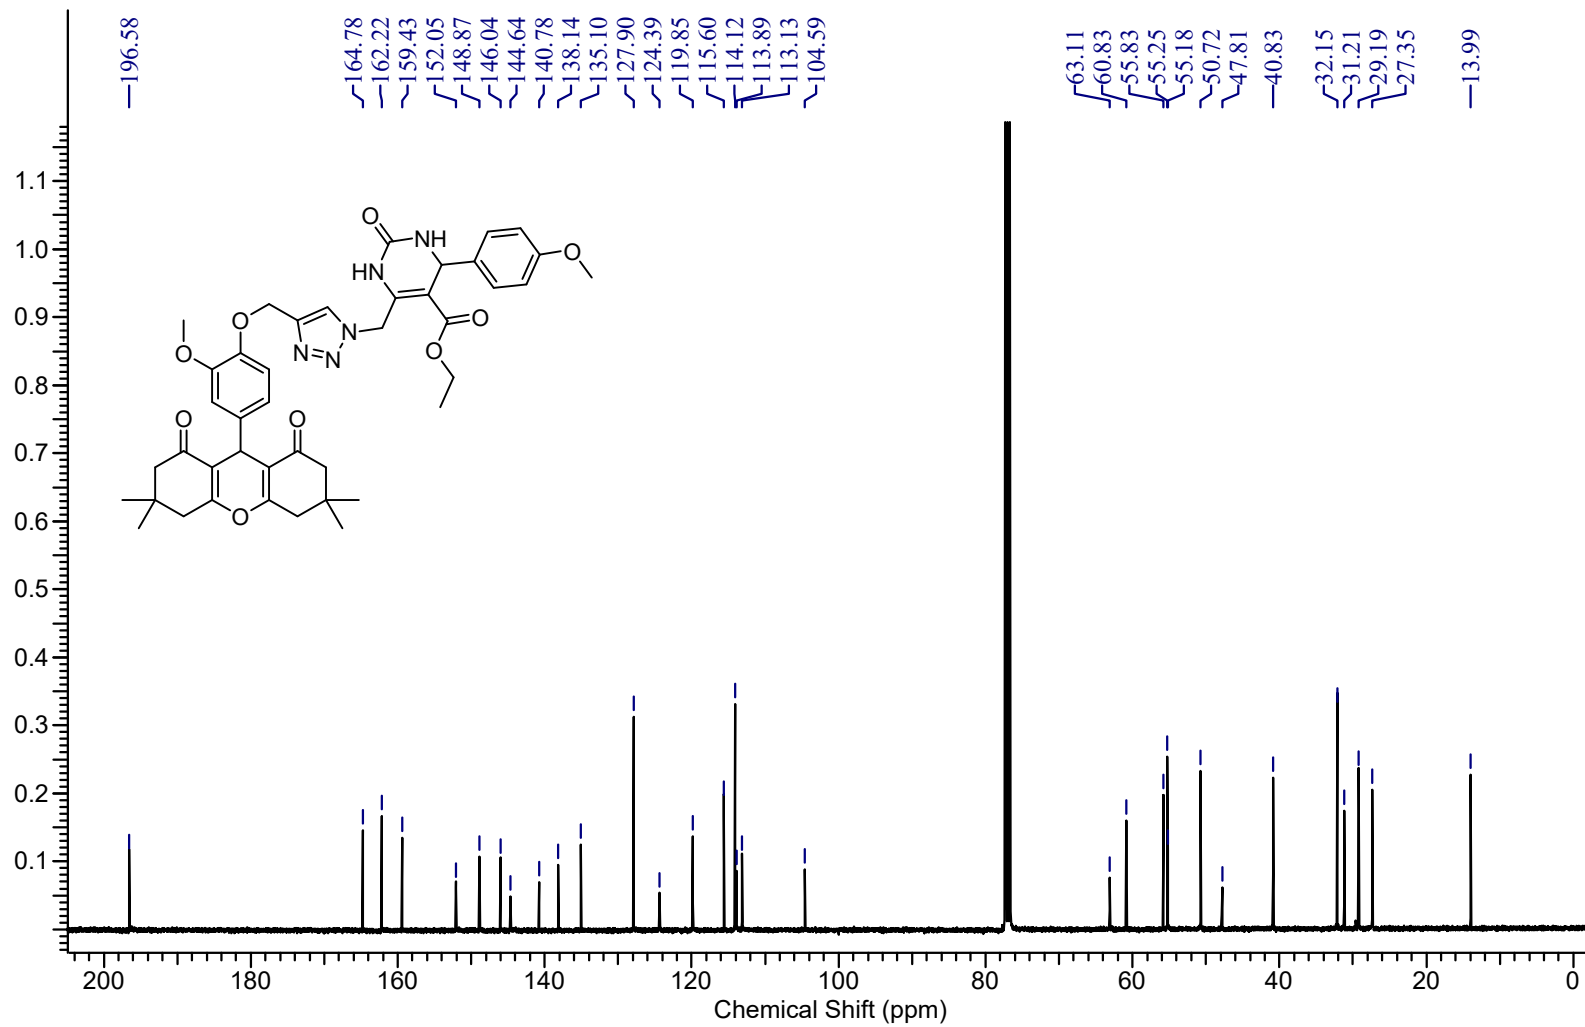

Figure S83: <sup>13</sup>C-NMR (100 MHz, CDCl<sub>3</sub>) of 15t.

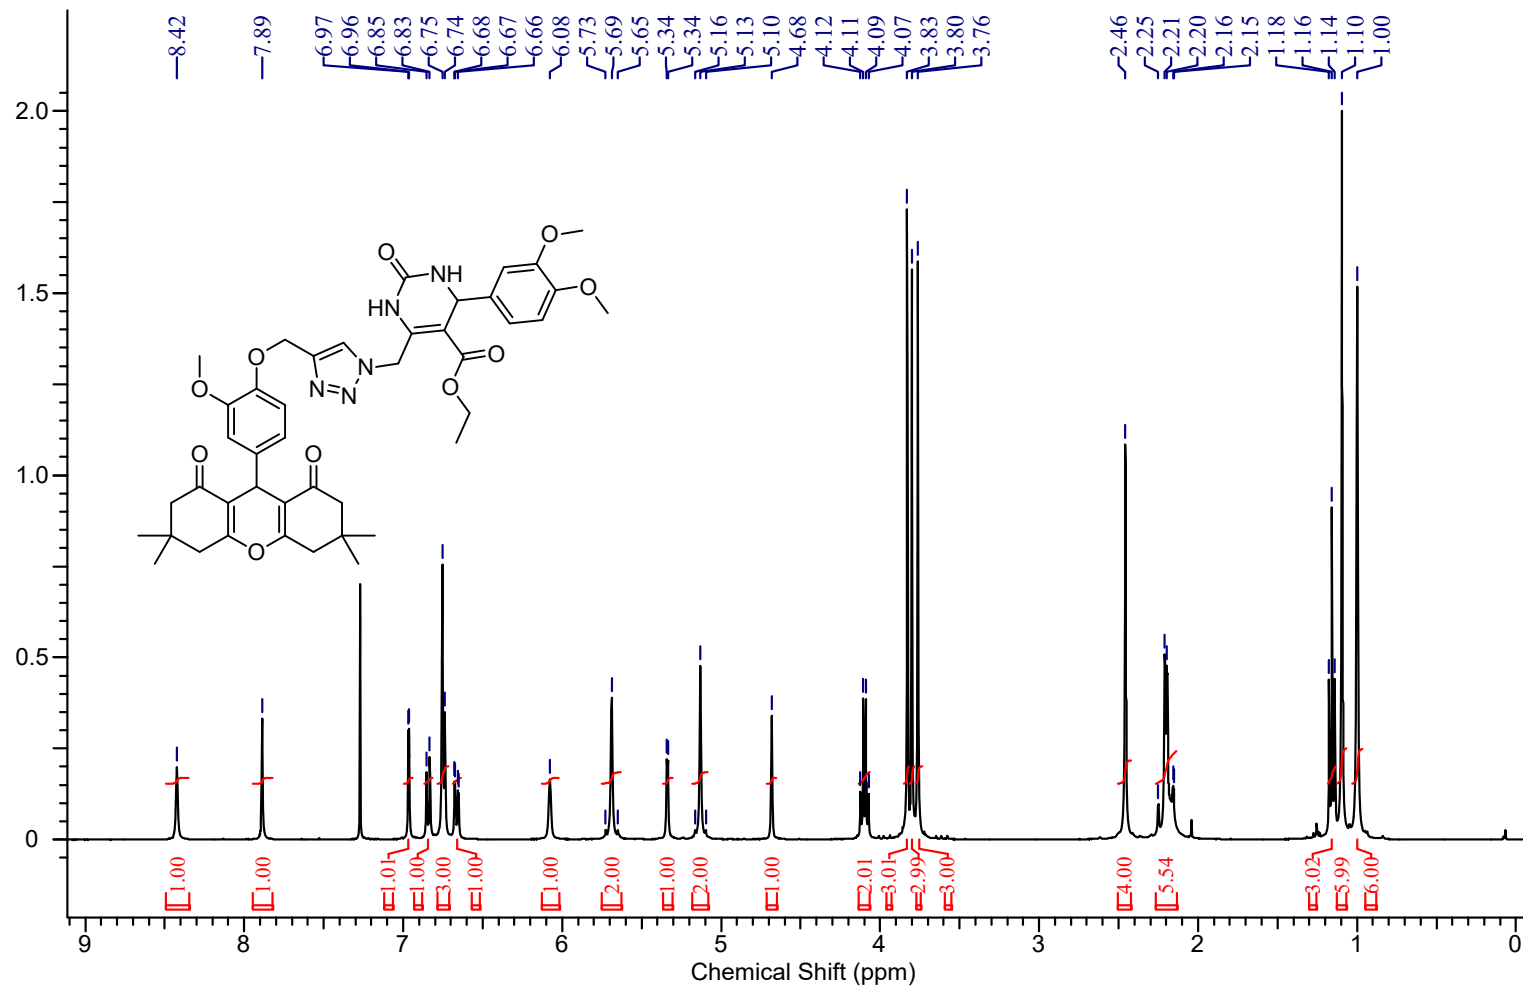

Figure S84:  $^1\text{H-NMR}$  (400 MHz,  $\text{CDCl}_3$ ) of 15u.

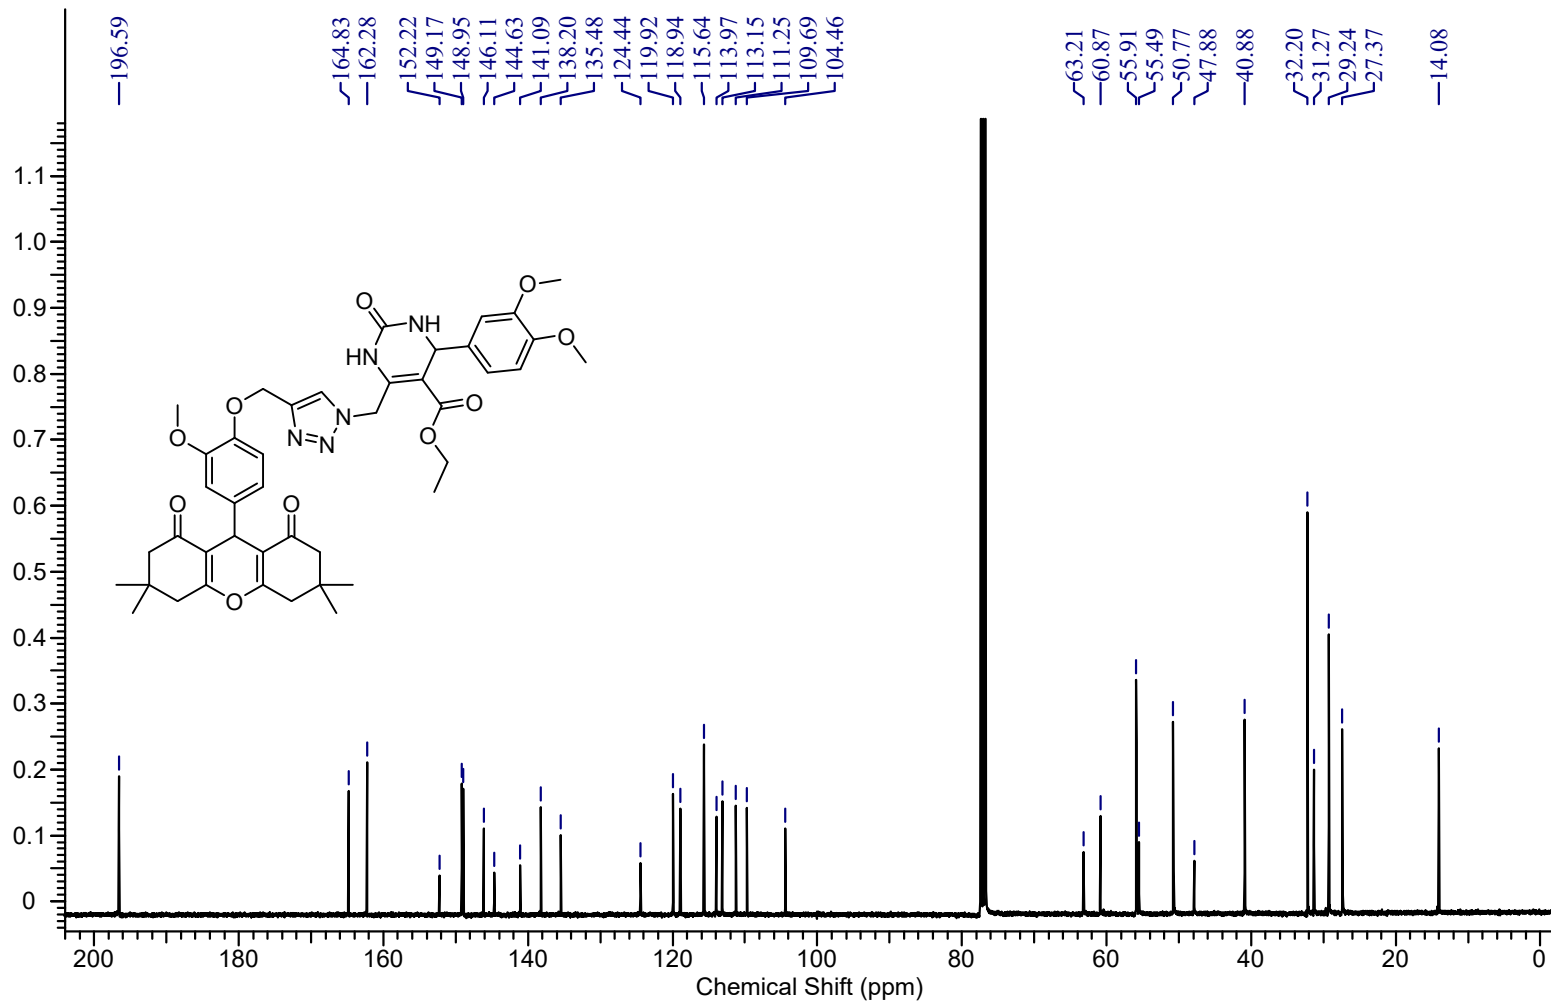

Figure S85:  $^{13}\text{C}$ -NMR (100 MHz,  $\text{CDCl}_3$ ) of 15u.

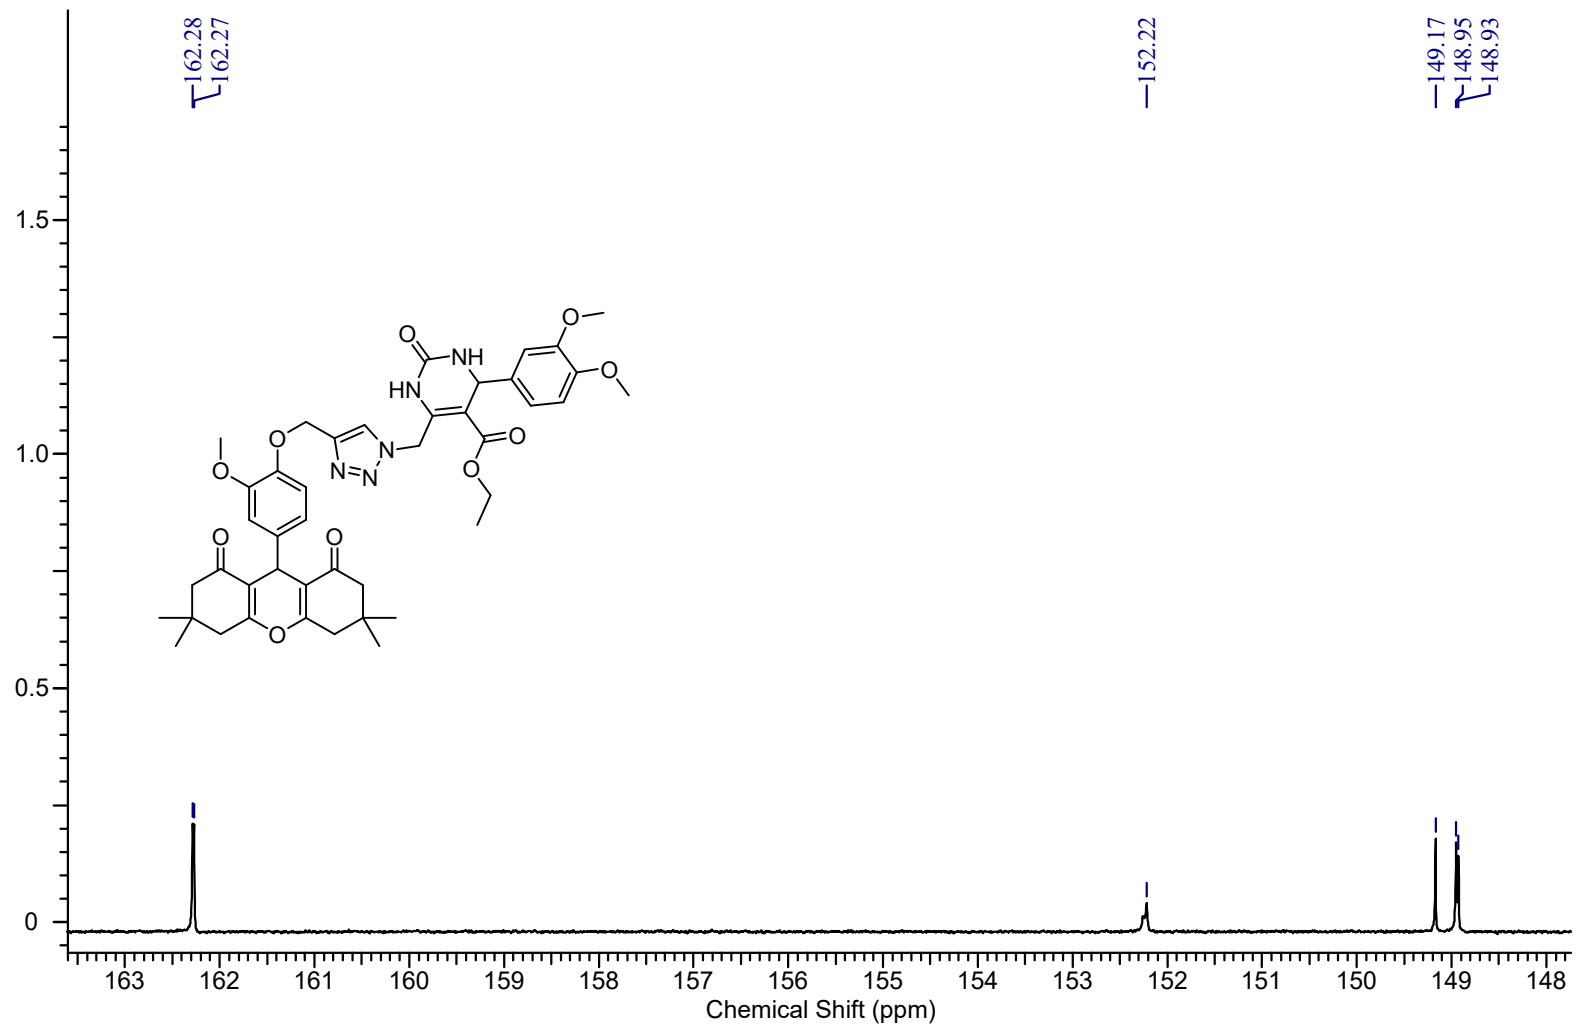

Figure S86: <sup>1</sup>H-NMR (400 MHz, CDCl<sub>3</sub>) of 15u (148.0 to 163.0 ppm).

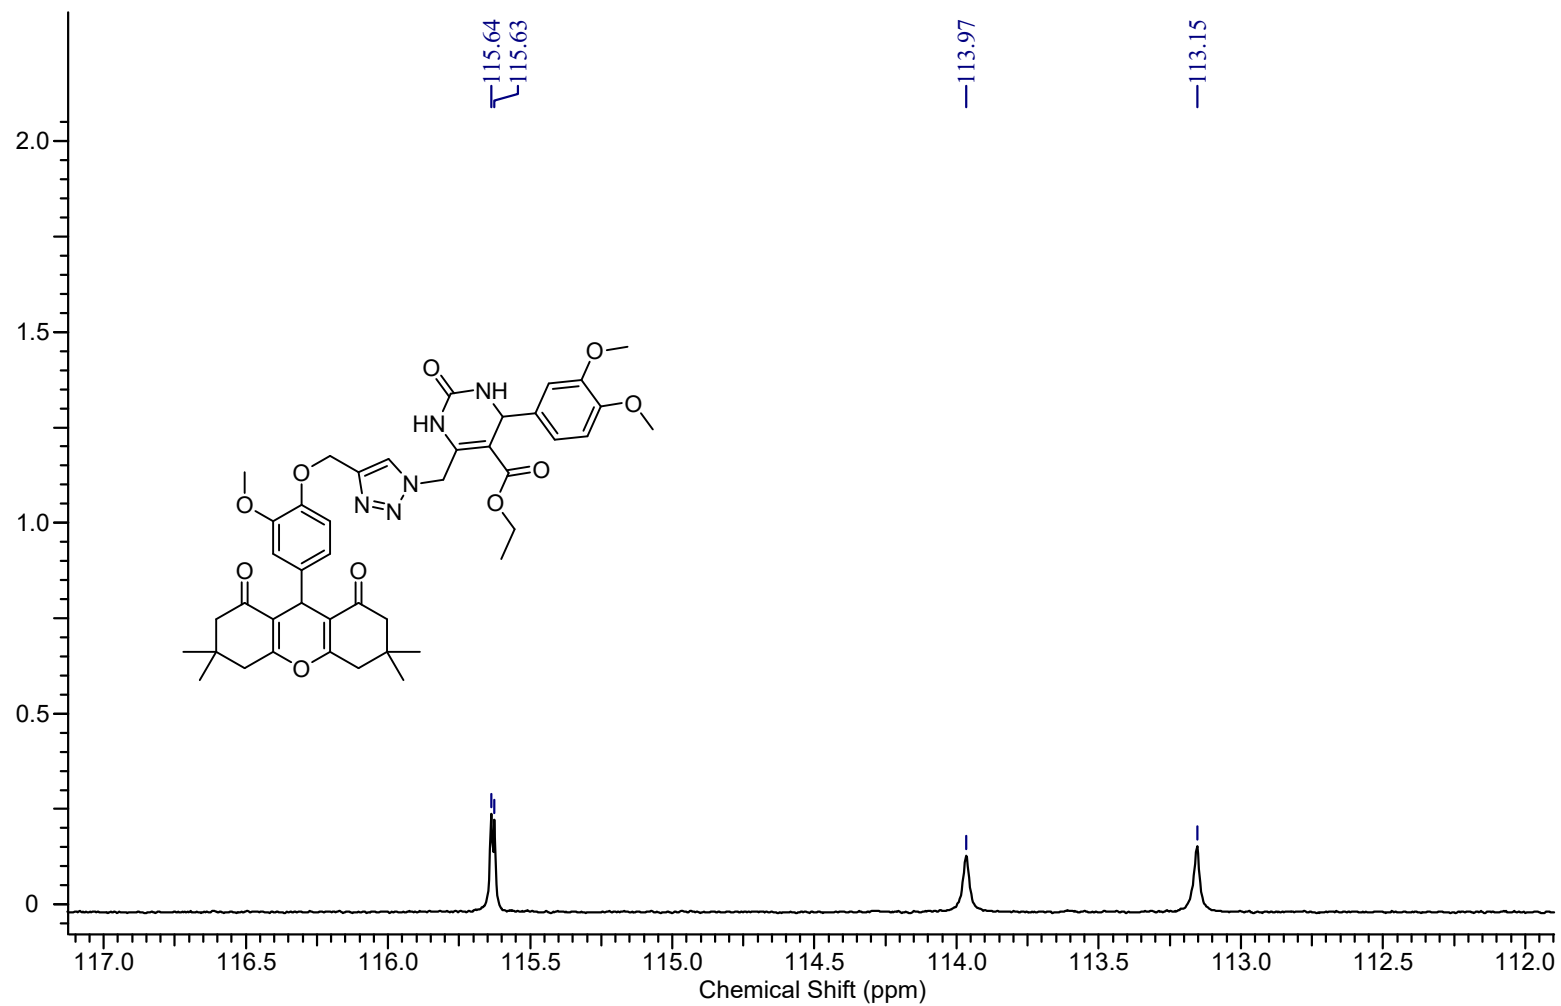

Figure S87: <sup>1</sup>H-NMR (400 MHz, CDCl<sub>3</sub>) of 15u (112.0 to 117.0 ppm).



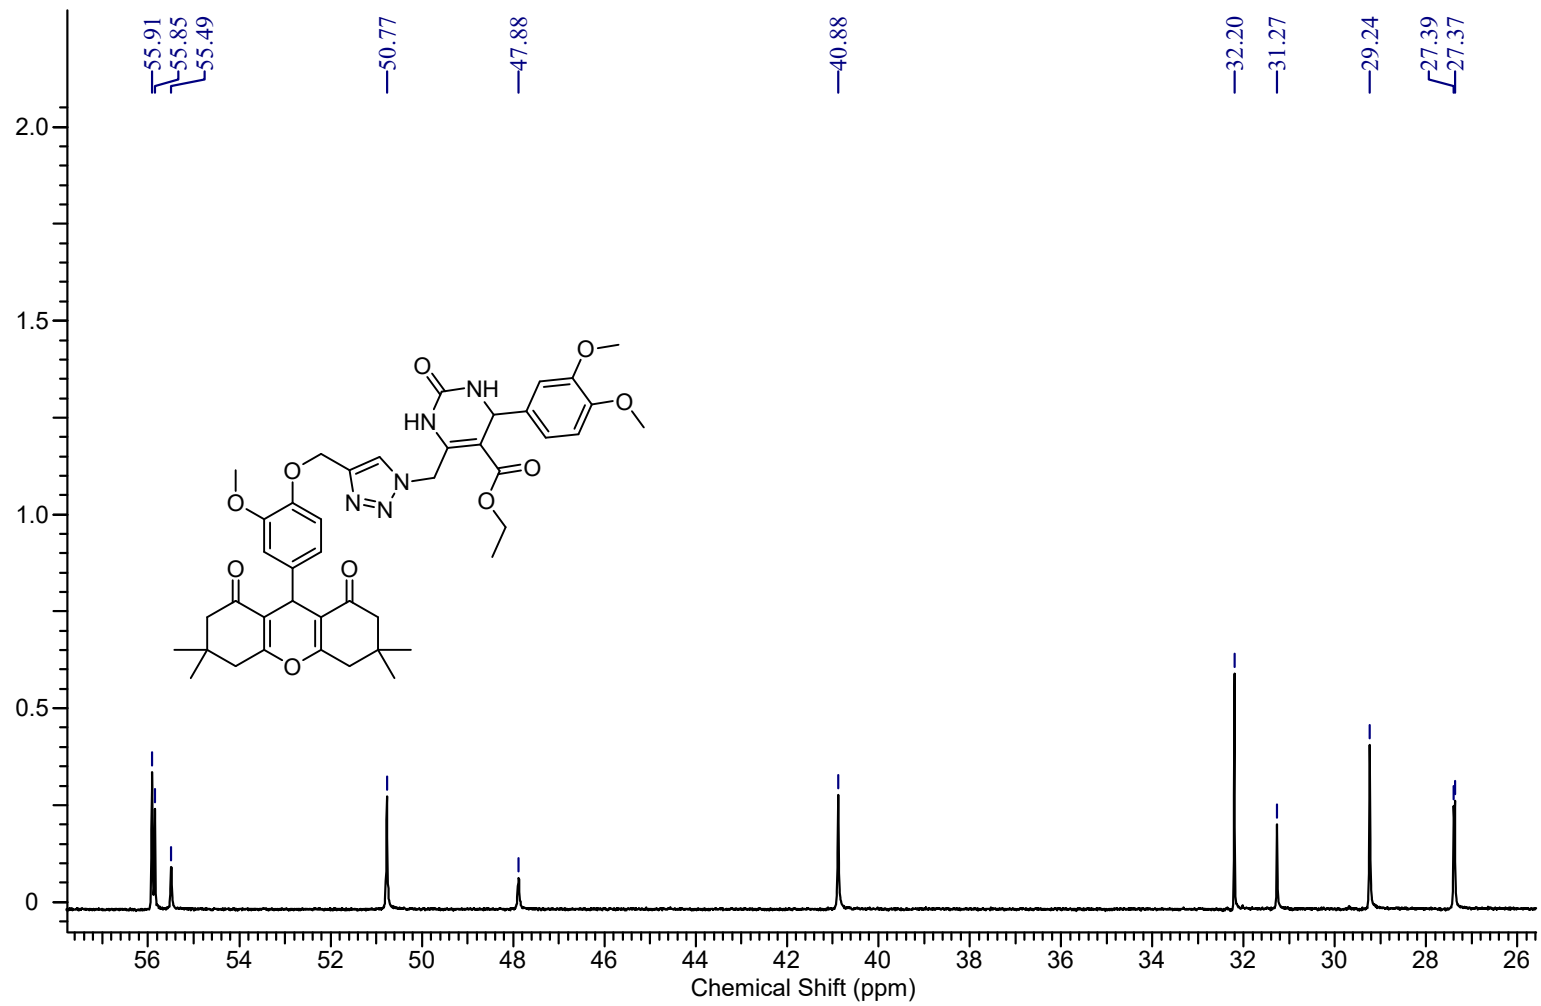

Figure S88:  $^1\text{H-NMR}$  (400 MHz,  $\text{CDCl}_3$ ) of 15u (26.0 to 57.0 ppm).

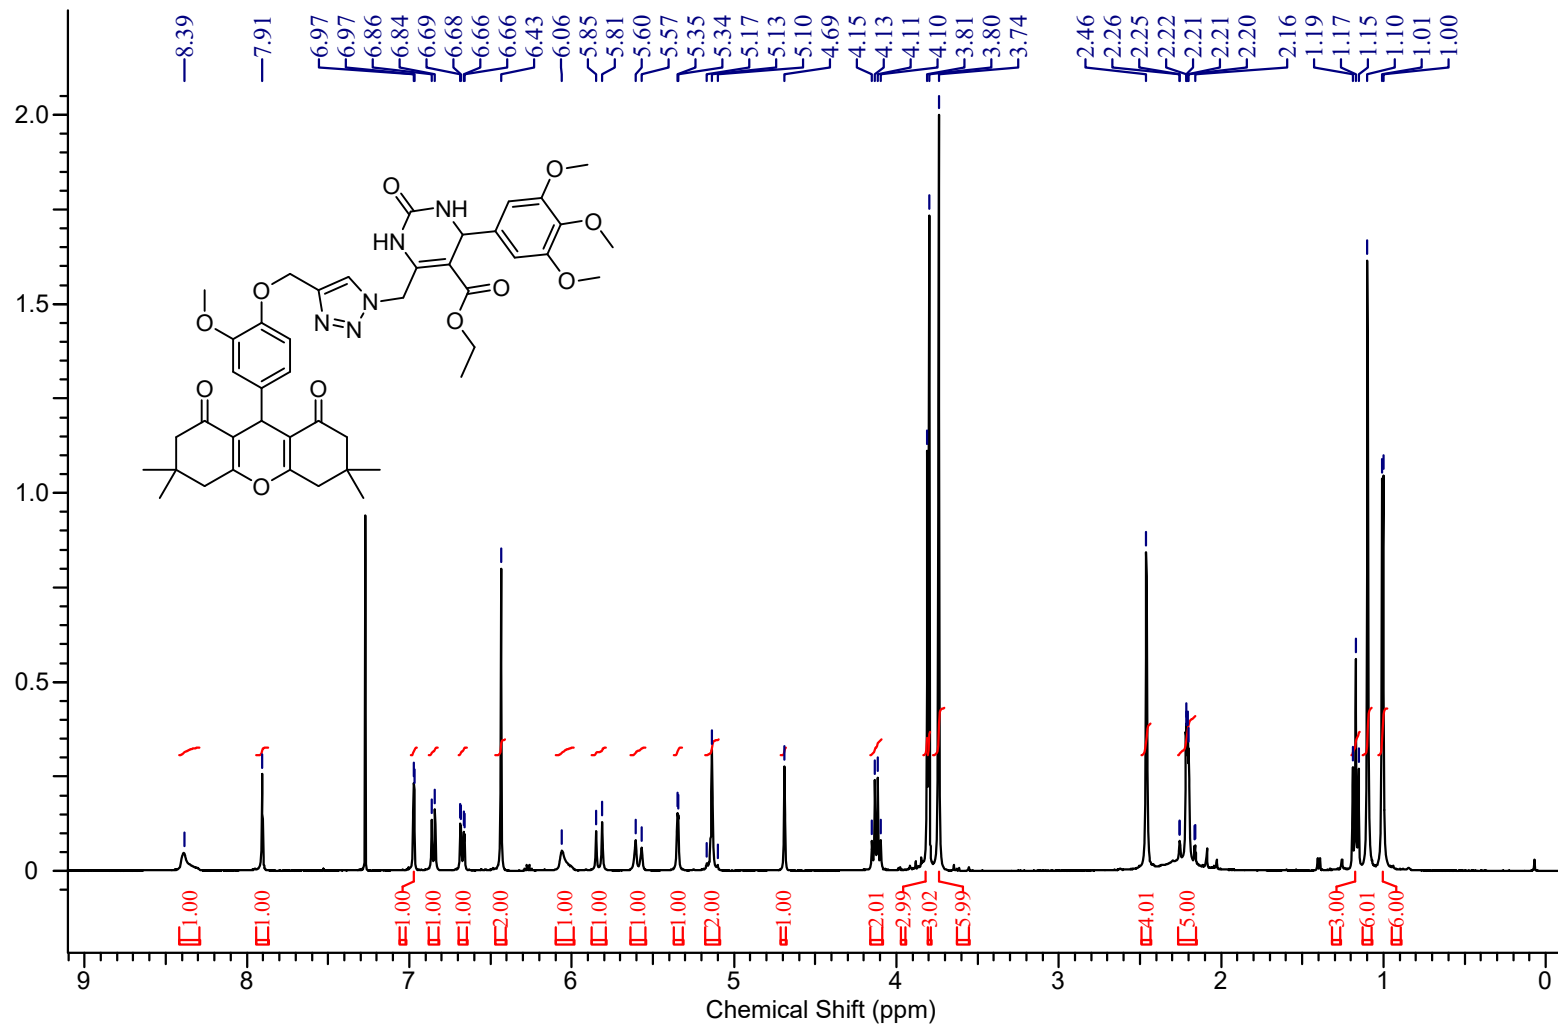

Figure S89: <sup>1</sup>H-NMR (400 MHz, CDCl<sub>3</sub>) of 15v.

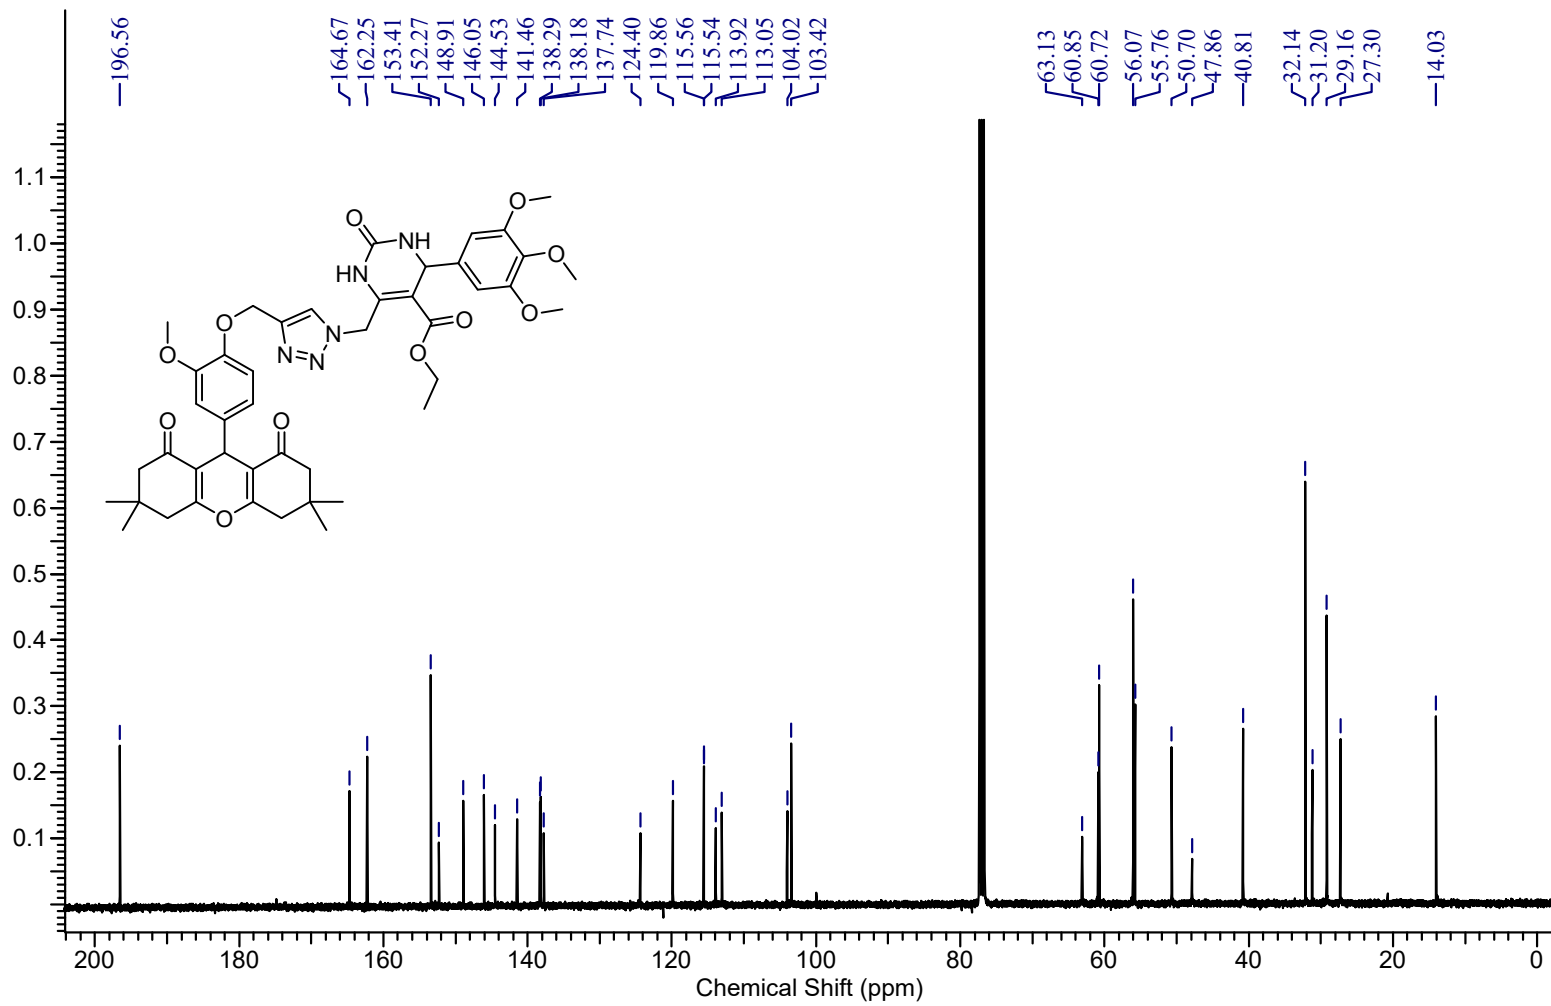

Figure S90:  $^{13}\text{C}$ -NMR (100 MHz,  $\text{CDCl}_3$ ) of 15v.

**Table S1. Antibiofilm activity of chromene and xanthene derivatives against *S. aureus*. The results are reported in % of biofilm formation at 570 nm compared to the untreated control (100% of biofilm formation).**

| Compound   | Concentration ( $\mu\text{g mL}^{-1}$ ) |                    |                   |                    |                     |                    |                    |                     |
|------------|-----------------------------------------|--------------------|-------------------|--------------------|---------------------|--------------------|--------------------|---------------------|
|            | 128                                     | 64                 | 32                | 16                 | 8                   | 4                  | 2                  | 1                   |
| 15a        | 46.37 $\pm$ 7.75*                       | 57.10 $\pm$ 7.60*  | 72.13 $\pm$ 8.68* | 82.81 $\pm$ 12.90  | 90.04 $\pm$ 7.33    | 91.38 $\pm$ 11.34  | 94.73 $\pm$ 12.55  | 100.61 $\pm$ 9.73   |
| 15b        | 50.38 $\pm$ 5.19*                       | 71.76 $\pm$ 5.47*  | 88.86 $\pm$ 11.15 | 90.11 $\pm$ 11.75  | 98.40 $\pm$ 6.01    | 100.39 $\pm$ 7.57  | 100.19 $\pm$ 10.72 | 114.84 $\pm$ 14.10  |
| 15c        | 66.29 $\pm$ 7.48*                       | 97.09 $\pm$ 6.66   | 103.19 $\pm$ 7.59 | 110.17 $\pm$ 12.69 | 110.68 $\pm$ 7.43   | 105.80 $\pm$ 5.67  | 110.38 $\pm$ 7.20  | 106.20 $\pm$ 8.34   |
| 15d        | 76.16 $\pm$ 3.87*                       | 81.32 $\pm$ 7.83*  | 80.35 $\pm$ 7.45* | 103.59 $\pm$ 6.85  | 109.83 $\pm$ 3.21*  | 97.48 $\pm$ 5.40   | 82.96 $\pm$ 3.03*  | 78.79 $\pm$ 4.46*   |
| 15e        | 65.54 $\pm$ 6.61*                       | 96.21 $\pm$ 12.63  | 106.70 $\pm$ 9.89 | 108.20 $\pm$ 9.40  | 111.99 $\pm$ 13.56  | 104.38 $\pm$ 8.59  | 106.06 $\pm$ 5.47  | 112.39 $\pm$ 15.43  |
| 15f        | 63.89 $\pm$ 9.22*                       | 85.93 $\pm$ 7.31*  | 93.58 $\pm$ 12.17 | 95.15 $\pm$ 8.24   | 93.71 $\pm$ 11.50   | 92.11 $\pm$ 12.05  | 93.05 $\pm$ 1.55*  | 98.78 $\pm$ 9.89    |
| 15g        | 79.15 $\pm$ 8.59*                       | 88.90 $\pm$ 7.41*  | 99.57 $\pm$ 3.72  | 104.45 $\pm$ 13.15 | 95.06 $\pm$ 7.28    | 92.68 $\pm$ 7.58   | 98.79 $\pm$ 3.15   | 108.32 $\pm$ 8.01   |
| 15h        | 85.45 $\pm$ 5.39*                       | 88.63 $\pm$ 9.69   | 95.40 $\pm$ 10.25 | 107.73 $\pm$ 9.24  | 101.00 $\pm$ 5.97   | 103.15 $\pm$ 10.80 | 95.60 $\pm$ 6.65   | 91.92 $\pm$ 8.24    |
| 15i        | 63.29 $\pm$ 1.64*                       | 74.19 $\pm$ 6.71*  | 88.82 $\pm$ 6.56* | 94.85 $\pm$ 4.41   | 95.90 $\pm$ 5.23    | 99.91 $\pm$ 7.65   | 96.78 $\pm$ 9.95   | 105.47 $\pm$ 10.10  |
| 15j        | 84.57 $\pm$ 5.06*                       | 89.05 $\pm$ 2.46*  | 94.19 $\pm$ 4.56  | 98.49 $\pm$ 1.68   | 100.39 $\pm$ 5.21   | 95.12 $\pm$ 6.43   | 93.33 $\pm$ 4.56   | 93.82 $\pm$ 9.23    |
| 15k        | 79.13 $\pm$ 0.99*                       | 82.45 $\pm$ 5.75*  | 93.46 $\pm$ 6.76  | 95.81 $\pm$ 11.60  | 97.23 $\pm$ 3.48    | 98.28 $\pm$ 5.52   | 96.38 $\pm$ 2.08*  | 99.26 $\pm$ 9.06    |
| 15l        | 58.21 $\pm$ 7.54*                       | 83.67 $\pm$ 7.57*  | 94.92 $\pm$ 5.87  | 109.66 $\pm$ 10.46 | 115.50 $\pm$ 2.21*  | 114.58 $\pm$ 6.48* | 108.90 $\pm$ 2.17* | 113.73 $\pm$ 10.32  |
| 15m        | 56.32 $\pm$ 7.78*                       | 78.28 $\pm$ 8.47*  | 86.31 $\pm$ 8.68  | 100.58 $\pm$ 4.95  | 105.67 $\pm$ 5.92   | 99.28 $\pm$ 9.87   | 102.03 $\pm$ 5.67  | 101.10 $\pm$ 9.11   |
| 15n        | 58.25 $\pm$ 7.08*                       | 72.65 $\pm$ 3.90*  | 98.24 $\pm$ 7.03  | 111.09 $\pm$ 8.46  | 108.95 $\pm$ 16.91  | 104.20 $\pm$ 9.42  | 106.41 $\pm$ 8.94  | 109.89 $\pm$ 3.61*  |
| 15o        | 72.75 $\pm$ 11.53*                      | 94.53 $\pm$ 8.34   | 102.88 $\pm$ 3.99 | 107.06 $\pm$ 4.11* | 123.19 $\pm$ 10.15* | 125.86 $\pm$ 16.83 | 128.31 $\pm$ 20.30 | 112.80 $\pm$ 0.66   |
| 15p        | 66.38 $\pm$ 7.29*                       | 81.78 $\pm$ 8.16*  | 92.53 $\pm$ 10.56 | 107.44 $\pm$ 5.34  | 116.65 $\pm$ 7.14*  | 116.10 $\pm$ 8.13* | 111.82 $\pm$ 5.86* | 123.08 $\pm$ 11.85* |
| 15q        | 54.19 $\pm$ 8.46*                       | 63.00 $\pm$ 11.32* | 69.72 $\pm$ 7.74* | 79.14 $\pm$ 7.16*  | 87.23 $\pm$ 8.11    | 86.24 $\pm$ 6.98*  | 90.48 $\pm$ 6.34   | 90.32 $\pm$ 12.47   |
| 15r        | 71.01 $\pm$ 10.46*                      | 73.86 $\pm$ 4.43*  | 99.84 $\pm$ 7.08  | 106.88 $\pm$ 7.38  | 107.16 $\pm$ 9.26   | 101.83 $\pm$ 6.30  | 102.49 $\pm$ 1.34  | 102.24 $\pm$ 1.49   |
| 15s        | 73.80 $\pm$ 8.21*                       | 88.58 $\pm$ 8.85   | 91.59 $\pm$ 9.14  | 96.09 $\pm$ 7.89   | 99.42 $\pm$ 4.48    | 101.18 $\pm$ 8.74  | 103.24 $\pm$ 8.76  | 122.70 $\pm$ 8.60*  |
| 15t        | 76.65 $\pm$ 5.99*                       | 81.96 $\pm$ 5.61*  | 98.70 $\pm$ 8.86  | 103.19 $\pm$ 7.03  | 110.63 $\pm$ 10.96  | 111.57 $\pm$ 9.44  | 107.43 $\pm$ 11.63 | 110.11 $\pm$ 10.22  |
| 15u        | 82.15 $\pm$ 5.40*                       | 94.10 $\pm$ 2.04*  | 97.61 $\pm$ 2.26  | 99.55 $\pm$ 3.58   | 105.11 $\pm$ 3.14*  | 101.54 $\pm$ 2.32  | 98.16 $\pm$ 5.74   | 97.28 $\pm$ 4.69    |
| 15v        | 77.29 $\pm$ 6.03*                       | 97.70 $\pm$ 10.79  | 99.60 $\pm$ 11.40 | 103.19 $\pm$ 3.87  | 103.10 $\pm$ 8.90   | 100.60 $\pm$ 14.78 | 102.28 $\pm$ 4.54  | 106.41 $\pm$ 7.02   |
| Vancomycin | Concentration ( $\mu\text{g mL}^{-1}$ ) |                    |                   |                    |                     |                    |                    |                     |
|            | 16                                      | 8                  | 4                 | 2                  | 1                   | 0.5                | 0.25               | 0.125               |
|            | 9.55 $\pm$ 1.46*                        | 10.27 $\pm$ 0.98*  | 12.88 $\pm$ 4.80* | 19.22 $\pm$ 3.22*  | 23.77 $\pm$ 1.80*   | 26.84 $\pm$ 4.10*  | 38.13 $\pm$ 3.93*  | 49.80 $\pm$ 4.65*   |

\* $p < 0.05$ .
